# Supplementary material for: Carbapenem-Nonsusceptible Enterobacteriaceae in Taiwan
Source: PubMed Central journal article supplement (PMC4368706; doi:10.1371/journal.pone.0121668), 2015-03-20
Supplement: pone.0121668.s001.pdf [file pone.0121668.s001.pdf]

S1. The raw data of 1135 carbapenem-resistant *Enterobacteriaceae* isolates

| CDCNO        | Special_ | Species_ Hosp | ETP | ERT_C20 | ETP_C20 | ETP_EU | IMP |
|--------------|----------|---------------|-----|---------|---------|--------|-----|
| 2011CRE E581 |          | C. freunc NTU | 2   | R       | R       | R      | 2   |
| 2011CRE E582 |          | C. freunc NTU | 1   | I       | R       | I      | 2   |
| 2011CRE E583 |          | C. freunc NTU | 2   | R       | R       | R      | 16  |
| 2011CRE E584 |          | E. cloaca NTU | 1   | I       | R       | I      | 1   |
| 2011CRE E585 |          | E. cloaca NTU | 0.5 | S       | I       | S      | 2   |
| 2011CRE E586 |          | E. cloaca NTU | 1   | I       | R       | I      | 1   |
| 2011CRE E587 |          | E. cloaca NTU | 2   | R       | R       | R      | 2   |
| 2011CRE E588 |          | E. aeroge NTU | 8   | R       | R       | R      | 8   |
| 2011CRE E590 |          | E. aeroge NTU | 2   | R       | R       | R      | 2   |
| 2011CRE E591 |          | E. aeroge NTU | 0.5 | S       | I       | S      | 2   |
| 2011CRE E592 |          | E. aeroge NTU | 0.5 | S       | I       | S      | 2   |
| 2011CRE E593 |          | E. aeroge NTU | 2   | R       | R       | R      | 2   |
| 2011CRE E594 |          | E. aeroge NTU | 1   | I       | R       | I      | 1   |
| 2011CRE E595 |          | E. aeroge NTU | 1   | I       | R       | I      | 1   |
| 2011CRE E596 |          | E. aeroge NTU | 2   | R       | R       | R      | 1   |
| 2011CRE E597 |          | E. cloaca NTU | 2   | R       | R       | R      | 1   |
| 2011CRE E598 |          | E. cloaca NTU | 2   | R       | R       | R      | 2   |
| 2011CRE E599 |          | E. cloaca NTU | 2   | R       | R       | R      | 32  |
| 2011CRE E600 |          | E. cloaca NTU | 1   | I       | R       | I      | 1   |
| 2011CRE E601 |          | E. cloaca NTU | 1   | I       | R       | I      | 2   |
| 2011CRE E602 |          | E. cloaca NTU | 4   | R       | R       | R      | 2   |
| 2011CRE E603 |          | E. cloaca NTU | 0.5 | S       | I       | S      | 2   |
| 2011CRE E604 |          | E. cloaca NTU | 2   | R       | R       | R      | 8   |
| 2011CRE E605 |          | E. cloaca NTU | 2   | R       | R       | R      | 1   |
| 2011CRE E606 |          | E. cloaca NTU | 2   | R       | R       | R      | 1   |
| 2011CRE E607 |          | E. cloaca NTU | 1   | I       | R       | I      | 1   |
| 2011CRE E608 |          | E. cloaca NTU | 1   | I       | R       | I      | 4   |
| 2011CRE E609 |          | E. cloaca NTU | 1   | I       | R       | I      | 1   |
| 2011CRE E612 |          | E. cloaca NTU | 1   | I       | R       | I      | 2   |
| 2011CRE E614 |          | E. coli NTU   | 4   | R       | R       | R      | 0.5 |
| 2011CRE E615 |          | E. coli NTU   | 1   | I       | R       | I      | 1   |
| 2011CRE E616 |          | E. coli NTU   | 1   | I       | R       | I      | 1   |
| 2011CRE E617 |          | E. coli NTU   | 1   | I       | R       | I      | 1   |
| 2011CRE E618 |          | E. coli NTU   | 4   | R       | R       | R      | 4   |
| 2011CRE E619 |          | E. coli NTU   | 2   | R       | R       | R      | 2   |
| 2011CRE E621 |          | E. coli NTU   | 4   | R       | R       | R      | 2   |
| 2011CRE E622 |          | E. coli NTU   | 16  | R       | R       | R      | 4   |
| 2011CRE E623 |          | E. coli NTU   | 4   | R       | R       | R      | 2   |
| 2011CRE E624 |          | E. cloaca NTU | 1   | I       | R       | I      | 1   |
| 2011CRE E625 |          | E. coli NTU   | 8   | R       | R       | R      | 2   |
| 2011CRE E626 |          | E. coli NTU   | 8   | R       | R       | R      | 4   |
| 2011CRE E627 |          | K. pneun NTU  | 1   | I       | R       | I      | 8   |
| 2011CRE E628 |          | K. pneun NTU  | 0.5 | S       | I       | S      | 2   |
| 2011CRE E629 |          | K. pneun NTU  | 1   | I       | R       | I      | 1   |
| 2011CRE E630 |          | K. pneun NTU  | 2   | R       | R       | R      | 4   |

|              |               |      |   |   |   |       |
|--------------|---------------|------|---|---|---|-------|
| 2011CRE E631 | K. pneunNTU   | 1    | I | R | I | 2     |
| 2011CRE E632 | K. pneunNTU   | 1    | I | R | I | 1     |
| 2011CRE E633 | K. pneunNTU   | 1    | I | R | I | 1     |
| 2011CRE E634 | K. pneunNTU   | 2    | R | R | R | 4     |
| 2011CRE E635 | K. pneunNTU   | 1    | I | R | I | 2     |
| 2011CRE E636 | K. pneunNTU   | 32   | R | R | R | 8     |
| 2011CRE E637 | K. pneunNTU   | 0.5  | S | I | S | 2     |
| 2011CRE E638 | K. pneunNTU   | 4    | R | R | R | 4     |
| 2011CRE E639 | K. pneunNTU   | 2    | R | R | R | 4     |
| 2011CRE E640 | K. pneunNTU   | 0.5  | S | I | S | 8     |
| 2011CRE E641 | K. pneunNTU   | 4    | R | R | R | 4     |
| 2011CRE E642 | K. pneunNTU   | 8    | R | R | R | 8     |
| 2011CRE E643 | K. pneunNTU   | 2    | R | R | R | 1     |
| 2011CRE E644 | K. pneunNTU   | 2    | R | R | R | 2     |
| 2011CRE E646 | K. pneunNTU   | >128 | R | R | R | 32    |
| 2011CRE E651 | E. aerogεNTU  | 1    | I | R | R | 2     |
| 2011CRE E652 | E. aerogεNTU  | 128  | R | R | R | 16    |
| 2011CRE E656 | E. aerogεNTU  | 1    | I | R | R | 0.5   |
| 2011CRE E657 | E. cloaca NTU | 1    | I | R | R | 0.25  |
| 2011CRE E658 | E. cloaca NTU | 1    | I | R | R | 0.5   |
| 2011CRE E659 | E. cloaca NTU | 1    | I | R | R | 0.5   |
| 2011CRE E660 | E. cloaca NTU | 1    | I | R | R | 0.5   |
| 2011CRE E661 | E. cloaca NTU | 8    | R | R | R | 2     |
| 2011CRE E663 | E. cloaca NTU | 2    | R | R | R | 0.5   |
| 2011CRE E664 | E. cloaca NTU | 8    | R | R | R | 1     |
| 2011CRE E665 | E. cloaca NTU | 1    | I | R | R | 0.5   |
| 2011CRE E666 | E. cloaca NTU | 1    | I | R | R | 0.25  |
| 2011CRE E667 | E. cloaca NTU | 1    | I | R | R | 0.5   |
| 2011CRE E668 | E. cloaca NTU | 2    | R | R | R | 0.25  |
| 2011CRE E669 | E. cloaca NTU | 1    | I | R | R | 0.25  |
| 2011CRE E670 | E. coli NTU   | 4    | R | R | R | 0.5   |
| 2011CRE E671 | E. coli NTU   | 1    | I | R | R | 0.125 |
| 2011CRE E672 | E. coli NTU   | 4    | R | R | R | 0.125 |
| 2011CRE E675 | E. coli NTU   | 8    | R | R | R | 1     |
| 2011CRE E676 | E. coli NTU   | 8    | R | R | R | 2     |
| 2011CRE E678 | K. pneunNTU   | 2    | R | R | R | 0.125 |
| 2011CRE E680 | K. pneunNTU   | 1    | I | R | R | 0.25  |
| 2011CRE E681 | K. pneunNTU   | 1    | I | R | R | 1     |
| 2011CRE E683 | K. pneunNTU   | 2    | R | R | R | 0.5   |
| 2011CRE E685 | K. pneunNTU   | 1    | I | R | R | 1     |
| 2011CRE E686 | K. pneunNTU   | 2    | R | R | R | 0.5   |
| 2011CRE E687 | K. pneunNTU   | 16   | R | R | R | 1     |
| 2011CRE E689 | K. pneunNTU   | 128  | R | R | R | 64    |
| 2011CRE E692 | K. pneunNTU   | 2    | R | R | R | 1     |
| 2011CRE E694 | K. pneunNTU   | 4    | R | R | R | 2     |
| 2011CRE E695 | K. pneunNTU   | 128  | R | R | R | 32    |

|              |               |     |   |   |   |       |
|--------------|---------------|-----|---|---|---|-------|
| 2011CRE E697 | K. pneunNTU   | 2   | R | R | R | 0.25  |
| 2011CRE E700 | K. pneunNTU   | 1   | I | R | R | 1     |
| 2011CRE E701 | K. pneunNTU   | 1   | I | R | R | 1     |
| 2011CRE E704 | C. koseri NTU | 1   | I | R | R | 0.25  |
| 2011CRE E705 | E. aerogεNTU  | 1   | I | R | R | 0.5   |
| 2011CRE E706 | E. aerogεNTU  | 1   | I | R | R | 1     |
| 2011CRE E710 | E. cloaca NTU | 1   | I | R | R | 0.5   |
| 2011CRE E711 | E. cloaca NTU | 1   | I | R | R | 2     |
| 2011CRE E713 | E. coli NTU   | 2   | R | R | R | 0.25  |
| 2011CRE E715 | E. coli NTU   | 2   | R | R | R | 1     |
| 2011CRE E718 | K. oxytoxNTU  | 64  | R | R | R | 64    |
| 2011CRE E719 | K. pneunNTU   | 2   | R | R | R | 1     |
| 2011CRE E720 | K. pneunNTU   | 4   | R | R | R | 0.5   |
| 2011CRE E721 | K. pneunNTU   | 2   | R | R | R | 0.25  |
| 2011CRE E723 | K. pneunNTU   | 32  | R | R | R | 4     |
| 2011CRE E724 | K. pneunNTU   | 2   | R | R | R | 0.5   |
| 2011CRE E725 | K. pneunNTU   | 1   | I | R | R | 1     |
| 2011CRE E726 | K. pneunNTU   | 1   | I | R | R | 0.25  |
| 2011CRE E727 | K. pneunNTU   | 2   | R | R | R | 1     |
| 2011CRE E728 | K. pneunNTU   | 128 | R | R | R | 16    |
| 2011CRE E729 | K. pneunNTU   | 2   | R | R | R | 1     |
| 2011CRE E730 | K. pneunNTU   | 1   | I | R | R | 2     |
| 2011CRE E731 | K. pneunNTU   | 2   | R | R | R | 2     |
| 2011CRE E732 | K. pneunNTU   | 1   | I | R | R | 1     |
| 2011CRE E733 | C. freuncNTU  | 1   | I | R | R | 8     |
| 2011CRE E735 | K. pneunNTU   | 8   | R | R | R | 4     |
| 2011CRE E736 | K. pneunNTU   | 1   | I | R | R | 0.25  |
| 2011CRE E737 | S. marce NTU  | 16  | R | R | R | 4     |
| 2011CRE E740 | E. cloaca NTU | 2   | R | R | R | 0.25  |
| 2011CRE E742 | E. cloaca NTU | 2   | R | R | R | 0.5   |
| 2011CRE E743 | E. cloaca NTU | 1   | I | R | R | 0.25  |
| 2011CRE E744 | K. pneunNTU   | 2   | R | R | R | 1     |
| 2011CRE E745 | K. pneunNTU   | 1   | I | R | R | 1     |
| 2011CRE E746 | K. pneunNTU   | 128 | R | R | R | 16    |
| 2011CRE E749 | K. pneunNTU   | 1   | I | R | R | 0.25  |
| 2011CRE E750 | E. coli NTU   | 4   | R | R | R | 0.5   |
| 2011CRE E752 | E. coli NTU   | 1   | I | R | R | 0.25  |
| 2011CRE E753 | K. pneunNTU   | 1   | I | R | R | 0.5   |
| 2011CRE E754 | K. pneunNTU   | 64  | R | R | R | 8     |
| 2011CRE E755 | K. pneunNTU   | 4   | R | R | R | 1     |
| 2011CRE E756 | E. coli NTU   | 4   | R | R | R | 0.25  |
| 2011CRE E757 | K. pneunNTU   | 1   | I | R | R | 0.125 |
| 2011CRE E759 | E. aerogεNTU  | 1   | I | R | R | 0.25  |
| 2011CRE E760 | K. pneunNTU   | 2   | R | R | R | 0.5   |
| 2011CRE E763 | K. pneunNTU   | 128 | R | R | R | 16    |
| 2011CRE E764 | E. cloaca NTU | 1   | I | R | R | 4     |

|             |                         |     |   |   |   |       |
|-------------|-------------------------|-----|---|---|---|-------|
| 2011CREE767 | K. pneunNTU             | 2   | R | R | R | 1     |
| 2011CREE768 | E. coli NTU             | 4   | R | R | R | 1     |
| 2011CREE769 | E. coli NTU             | 1   | I | R | R | 0.25  |
| 2011CREE770 | K. pneunNTU             | 2   | R | R | R | 1     |
| 2011CREE771 | K. pneunNTU             | 1   | I | R | R | 1     |
| 2011CREE773 | E. cloaca NTU           | 8   | R | R | R | 0.5   |
| 2011CREE774 | K. pneunNTU             | 1   | I | R | R | 0.5   |
| 2011CREE775 | E. cloaca NTU           | 1   | I | R | R | 0.25  |
| 2011CREE776 | K. pneunNTU             | 2   | R | R | R | 0.5   |
| 2011CREE777 | K. pneunNTU             | 2   | R | R | R | 0.125 |
| 2011CREE778 | K. pneunNTU             | 1   | I | R | R | 2     |
| 2011CREE779 | K. pneunNTU             | 1   | I | R | R | 1     |
| 2011CREE780 | E. cloaca NTU           | 2   | R | R | R | 0.25  |
| 2011CREE783 | K. pneunNTU             | 1   | I | R | R | 0.5   |
| 2011CREE784 | K. pneunNTU             | 2   | R | R | R | 1     |
| 2011CREE785 | K. pneunNTU             | 2   | R | R | R | 0.5   |
| 2011CREE786 | K. pneunNTU             | 2   | R | R | R | 0.125 |
| 2011CREE787 | K. pneunNTU             | 1   | I | R | R | 0.25  |
| 2011CREE788 | K. pneunNTU             | 32  | R | R | R | 8     |
| 2011CREE789 | K. pneunNTU             | 4   | R | R | R | 0.5   |
| 2011CREE791 | E. cloaca NTU           | 1   | I | R | R | 0.25  |
| 2011CREE793 | E. aerog $\epsilon$ NTU | 64  | R | R | R | 8     |
| 2011CREE798 | E. coli NTU             | 1   | I | R | R | 0.25  |
| 2011CREE799 | E. aerog $\epsilon$ NTU | 1   | I | R | R | 1     |
| 2011CREE800 | K. pneunNTU             | 2   | R | R | R | 0.5   |
| 2011CREE801 | K. pneunNTU             | 32  | R | R | R | 2     |
| 2011CREE802 | E. coli NTU             | 2   | R | R | R | 0.5   |
| 2011CREE803 | K. pneunNTU             | 2   | R | R | R | 1     |
| 2011CREE804 | E. cloaca NTU           | 2   | R | R | R | 1     |
| 2011CREE805 | E. cloaca NTU           | 2   | R | R | R | 1     |
| 2011CREE806 | E. aerog $\epsilon$ NTU | 1   | I | R | R | 2     |
| 2011CREE807 | E. coli NTU             | 2   | R | R | R | 1     |
| 2011CREE808 | K. pneunNTU             | 2   | R | R | R | 1     |
| 2011CREE809 | K. pneunNTU             | 8   | R | R | R | 8     |
| 2011CREE810 | K. pneunNTU             | 2   | R | R | R | 0.5   |
| 2011CREE811 | E. cloaca NTU           | 2   | R | R | R | 1     |
| 2011CREE813 | E. coli NTU             | 2   | R | R | R | 1     |
| 2011CREE814 | K. pneunNTU             | 1   | I | R | R | 0.5   |
| 2011CREE816 | E. aerog $\epsilon$ NTU | 2   | R | R | R | 2     |
| 2011CREE817 | E. cloaca NTU           | 2   | R | R | R | 0.25  |
| 2011CREE819 | K. pneunNTU             | 1   | I | R | R | 0.5   |
| 2011CREE820 | E. aerog $\epsilon$ NTU | 4   | R | R | R | 0.5   |
| 2011CREE822 | K. pneunNTU             | 128 | R | R | R | 16    |
| 2011CREE823 | E. cloaca NTU           | 4   | R | R | R | 1     |
| 2011CREE824 | E. aerog $\epsilon$ NTU | 1   | I | R | R | 1     |
| 2011CREE826 | K. pneunNTU             | 4   | R | R | R | 1     |

|              |                |     |   |   |   |       |
|--------------|----------------|-----|---|---|---|-------|
| 2011CRE E827 | E. coli NTU    | 1   | I | R | R | 0.25  |
| 2011CRE E828 | K. pneunNTU    | 2   | R | R | R | 1     |
| 2011CRE E831 | K. pneunNTU    | 16  | R | R | R | 2     |
| 2011CRE E832 | K. pneunNTU    | 2   | R | R | R | 0.5   |
| 2011CRE E833 | E. cloaca NTU  | 16  | R | R | R | 1     |
| 2011CRE E834 | E. cloaca NTU  | 4   | R | R | R | 16    |
| 2011CRE E835 | K. pneunNTU    | 2   | R | R | R | 1     |
| 2011CRE E836 | E. cloaca NTU  | 4   | R | R | R | 0.5   |
| 2011CRE E839 | K. pneunNTU    | 2   | R | R | R | 1     |
| 2011CRE E840 | E. coli NTU    | 4   | R | R | R | 1     |
| 2011CRE E841 | K. pneunNTU    | 1   | I | R | R | 0.5   |
| 2011CRE E844 | E. aerogεNTU   | 2   | R | R | R | 2     |
| 2011CRE E845 | E. cloaca NTU  | 2   | R | R | R | 0.5   |
| 2011CRE E846 | E. cloaca NTU  | 1   | I | R | R | 0.25  |
| 2011CRE E848 | E. coli NTU    | 4   | R | R | R | 0.25  |
| 2011CRE E849 | E. coli NTU    | 2   | R | R | R | 0.5   |
| 2011CRE E850 | E. cloaca NTU  | 1   | I | R | R | 0.5   |
| 2011CRE E851 | K. pneunNTU    | 2   | R | R | R | 0.5   |
| 2011CRE E853 | E. cloaca NTU  | 0.5 | S | I | S | 2     |
| 2011CRE E854 | E. aerogεNTU   | 32  | R | R | R | 8     |
| 2011CRE E855 | E. cloaca NTU  | 1   | I | R | R | 0.25  |
| 2011CRE E858 | E. coli NTU    | 4   | R | R | R | 1     |
| 2011CRE E859 | C. freuncNTU   | 2   | R | R | R | 0.25  |
| 2011CRE E860 | E. cloaca NTU  | 1   | I | R | R | 0.25  |
| 2011CRE E861 | E. coli NTU    | 2   | R | R | R | 1     |
| 2011CRE E862 | K. pneunNTU    | 1   | I | R | R | 0.25  |
| 2011CRE E863 | K. pneunNTU    | 1   | I | R | R | 0.125 |
| 2011CRE E864 | K. pneunNTU    | 1   | I | R | R | 1     |
| 2011CRE E865 | E. cloaca NTU  | 16  | R | R | R | 2     |
| 2011CRE E866 | E. cloaca NTU  | 2   | R | R | R | 0.5   |
| 2011CRE E867 | K. pneunNTU    | 1   | I | R | R | 0.5   |
| 2011CRE E869 | E. cloaca NTU  | 2   | R | R | R | 2     |
| 2011CRE E870 | E. cloaca NTU  | 1   | I | R | R | 0.5   |
| 2011CRE E871 | K. pneunNTU    | 2   | R | R | R | 1     |
| 2011CRE E873 | E. coli NTU    | 2   | R | R | R | 0.25  |
| 2011CRE E874 | P. stuarti NTU | 4   | R | R | R | 2     |
| 2011CRE E875 | K. pneunNTU    | 1   | I | R | R | 0.5   |
| 2011CRE E876 | E. cloaca NTU  | 1   | I | R | R | 0.25  |
| 2011CRE E877 | K. pneunNTU    | 1   | I | R | R | 0.5   |
| 2011CRE E878 | E. cloaca NTU  | 2   | R | R | R | 0.5   |
| 2011CRE E880 | K. pneunNTU    | 8   | R | R | R | 1     |
| 2011CRE E881 | K. pneunNTU    | 2   | R | R | R | 0.5   |
| 2011CRE E882 | K. pneunNTU    | 2   | R | R | R | 0.5   |
| 2011CRE E884 | K. pneunNTU    | 1   | I | R | R | 0.5   |
| 2011CRE E885 | K. planticNTU  | 2   | R | R | R | 1     |
| 2011CRE E892 | E. cloaca NTU  | 1   | I | R | R | 0.5   |

|              |               |    |   |   |   |       |
|--------------|---------------|----|---|---|---|-------|
| 2011CRE E893 | E. coli NTU   | 2  | R | R | R | 0.25  |
| 2011CRE E894 | E. aerogεNTU  | 1  | I | R | R | 0.5   |
| 2011CRE E896 | K. pneunNTU   | 1  | I | R | R | 0.5   |
| 2011CRE E897 | K. pneunNTU   | 2  | R | R | R | 0.125 |
| 2011CRE E899 | E. coli NTU   | 2  | R | R | R | 1     |
| 2011CRE E900 | K. pneunNTU   | 2  | R | R | R | 0.5   |
| 2011CRE E901 | K. pneunNTU   | 64 | R | R | R | 16    |
| 2011CRE E903 | K. pneunNTU   | 8  | R | R | R | 1     |
| 2011CRE E905 | K. pneunNTU   | 1  | I | R | R | 0.5   |
| 2011CRE E906 | E. aerogεNTU  | 1  | I | R | R | 1     |
| 2011CRE E907 | E. cloaca NTU | 2  | R | R | R | 1     |
| 2011CRE E908 | E. cloaca NTU | 1  | I | R | R | 0.5   |
| 2011CRE E909 | K. pneunNTU   | 4  | R | R | R | 1     |
| 2011CRE E910 | E. aerogεNTU  | 1  | I | R | R | 0.25  |
| 2011CRE E911 | E. cloaca NTU | 1  | I | R | R | 0.5   |
| 2011CRE E912 | K. pneunNTU   | 1  | I | R | R | 1     |
| 2011CRE E914 | E. coli NTU   | 32 | R | R | R | 4     |
| 2011CRE E915 | C. freuncNTU  | 1  | I | R | R | 0.5   |
| 2011CRE E917 | K. pneunNTU   | 1  | I | R | R | 1     |
| 2011CRE E922 | E. cloaca NTU | 1  | I | R | R | 0.5   |
| 2011CRE E924 | E. cloaca NTU | 8  | R | R | R | 2     |
| 2011CRE E927 | E. coli NTU   | 4  | R | R | R | 1     |
| 2011CRE E928 | E. coli NTU   | 16 | R | R | R | 2     |
| 2011CRE E929 | K. pneunNTU   | 1  | I | R | R | 0.5   |
| 2011CRE E930 | K. pneunNTU   | 1  | I | R | R | 2     |
| 2011CRE E931 | K. pneunNTU   | 2  | R | R | R | 1     |
| 2011CRE E932 | K. pneunNTU   | 8  | R | R | R | 1     |
| 2011CRE E933 | K. pneunNTU   | 1  | I | R | R | 1     |
| 2011CRE E937 | E. aerogεNTU  | 2  | R | R | R | 0.25  |
| 2011CRE E938 | C. freuncNTU  | 2  | R | R | R | 0.5   |
| 2011CRE E939 | E. aerogεNTU  | 16 | R | R | R | 2     |
| 2011CRE E940 | E. aerogεNTU  | 1  | I | R | R | 2     |
| 2011CRE E942 | E. aerogεNTU  | 1  | I | R | R | 0.5   |
| 2011CRE E943 | E. aerogεNTU  | 1  | I | R | R | 0.25  |
| 2011CRE E944 | E. cloaca NTU | 8  | R | R | R | 4     |
| 2011CRE E946 | E. cloaca NTU | 64 | R | R | R | 64    |
| 2011CRE E947 | E. cloaca NTU | 4  | R | R | R | 1     |
| 2011CRE E948 | E. cloaca NTU | 1  | I | R | R | 0.25  |
| 2011CRE E949 | E. cloaca NTU | 16 | R | R | R | 2     |
| 2011CRE E950 | E. cloaca NTU | 1  | I | R | R | 0.5   |
| 2011CRE E951 | E. coli NTU   | 2  | R | R | R | 1     |
| 2011CRE E952 | E. coli NTU   | 1  | I | R | R | 0.125 |
| 2011CRE E954 | E. coli NTU   | 2  | R | R | R | 0.5   |
| 2011CRE E955 | E. coli NTU   | 32 | R | R | R | 16    |
| 2011CRE E956 | K. pneunNTU   | 2  | R | R | R | 0.125 |
| 2011CRE E957 | K. pneunNTU   | 2  | R | R | R | 0.5   |

|               |                |     |   |   |   |      |
|---------------|----------------|-----|---|---|---|------|
| 2011CRE E958  | K. pneun NTU   | 1   | I | R | R | 0.5  |
| 2011CRE E962  | K. pneun NTU   | 1   | I | R | R | 1    |
| 2011CRE E963  | K. pneun NTU   | 1   | I | R | R | 0.5  |
| 2011CRE E965  | E. cloaca NTU  | 1   | I | R | R | 0.5  |
| 2011CRE E966  | K. pneun NTU   | 2   | R | R | R | 0.5  |
| 2011CRE E967  | K. pneun NTU   | 2   | R | R | R | 0.5  |
| 2011CRE E968  | K. pneun NTU   | 1   | I | R | R | 0.25 |
| 2011CRE E969  | K. pneun NTU   | 1   | I | R | R | 0.5  |
| 2011CRE E970  | E. cloaca NTU  | 1   | I | R | R | 0.25 |
| 2011CRE E971  | E. cloaca NTU  | 1   | I | R | R | 0.25 |
| 2011CRE E972  | E. cloaca NTU  | 2   | R | R | R | 0.5  |
| 2011CRE E973  | E. cloaca NTU  | 1   | I | R | R | 0.5  |
| 2011CRE E974  | K. pneun NTU   | 0.5 | S | I | S | 2    |
| 2011CRE E975  | E. cloaca NTU  | 1   | I | R | R | 0.25 |
| 2011CRE E977  | E. cloaca NTU  | 2   | R | R | R | 0.5  |
| 2011CRE E978  | K. pneun NTU   | 1   | I | R | R | 0.25 |
| 2011CRE E980  | E. cloaca NTU  | 1   | I | R | R | 0.5  |
| 2011CRE E982  | K. pneun NTU   | 2   | R | R | R | 0.25 |
| 2011CRE E984  | E. cloaca NTU  | 1   | I | R | R | 0.5  |
| 2011CRE E985  | E. cloaca NTU  | 8   | R | R | R | 0.5  |
| 2011CRE E986  | K. pneun NTU   | 1   | I | R | R | 2    |
| 2011CRE E987  | E. cloaca NTU  | 4   | R | R | R | 0.5  |
| 2011CRE E988  | E. cloaca NTU  | 1   | I | R | R | 0.5  |
| 2011CRE E989  | E. coli NTU    | 2   | R | R | R | 0.25 |
| 2011CRE E991  | E. aerogε NTU  | 4   | R | R | R | 2    |
| 2011CRE E995  | E. aerogε NTU  | 4   | R | R | R | 2    |
| 2011CRE E997  | E. cloaca NTU  | 1   | I | R | R | 0.25 |
| 2011CRE E998  | E. cloaca NTU  | 32  | R | R | R | 8    |
| 2011CRE E999  | E. cloaca NTU  | 64  | R | R | R | 16   |
| 2011CRE E1000 | E. cloaca NTU  | 1   | I | R | R | 1    |
| 2011CRE F002  | E. aerogε NTU  | 32  | R | R | R | 4    |
| 2011CRE F004  | E. aerogε NTU  | 128 | R | R | R | 16   |
| 2011CRE F006  | K. pneun NTU   | 4   | R | R | R | 2    |
| 2011CRE F007  | K. pneun NTU   | 2   | R | R | R | 0.5  |
| 2011CRE F009  | K. pneun NTU   | 1   | I | R | R | 0.25 |
| 2011CRE F011  | K. plantic NTU | 16  | R | R | R | 64   |
| 2011CRE F013  | M. morg NTU    | 2   | R | R | R | 4    |
| 2011CRE F014  | P. rettge NTU  | 4   | R | R | R | 2    |
| 2011CRE F015  | K. pneun NTU   | 2   | R | R | R | 1    |
| 2011CRE F016  | E. coli NTU    | 1   | I | R | R | 0.5  |
| 2011CRE F017  | E. cloaca NTU  | 1   | I | R | R | 0.5  |
| 2011CRE F018  | K. pneun NTU   | 4   | R | R | R | 2    |
| 2011CRE F019  | E. aerogε NTU  | 2   | R | R | R | 0.5  |
| 2011CRE F020  | E. cloaca NTU  | 4   | R | R | R | 0.5  |
| 2011CRE F021  | E. cloaca NTU  | 1   | I | R | R | 1    |
| 2011CRE F022  | E. cloaca NTU  | 1   | I | R | R | 0.5  |

|              |               |      |   |   |   |      |
|--------------|---------------|------|---|---|---|------|
| 2011CRE F023 | E. cloaca NTU | 2    | R | R | R | 1    |
| 2011CRE F025 | E. cloaca NTU | 4    | R | R | R | 0.5  |
| 2011CRE F026 | E. cloaca NTU | 2    | R | R | R | 2    |
| 2011CRE F027 | E. cloaca NTU | 2    | R | R | R | 0.5  |
| 2011CRE F028 | E. cloaca NTU | 1    | I | R | R | 0.25 |
| 2011CRE F029 | C. koseri NTU | 2    | R | R | R | 1    |
| 2011CRE F030 | E. aerogε NTU | 1    | I | R | R | 0.5  |
| 2011CRE F032 | E. cloaca NTU | 4    | R | R | R | 1    |
| 2011CRE F036 | E. cloaca NTU | 2    | R | R | R | 1    |
| 2011CRE F037 | E. cloaca NTU | 8    | R | R | R | 8    |
| 2011CRE F038 | E. cloaca NTU | 1    | I | R | R | 0.5  |
| 2011CRE F039 | E. cloaca NTU | 1    | I | R | R | 0.5  |
| 2011CRE F041 | E. cloaca NTU | 4    | R | R | R | 1    |
| 2011CRE F042 | E. cloaca NTU | 2    | R | R | R | 0.5  |
| 2011CRE F044 | E. cloaca NTU | 1    | I | R | R | 0.5  |
| 2011CRE F046 | E. coli NTU   | 1    | I | R | R | 0.5  |
| 2011CRE F178 | K. pneunYTM   | 1    | I | R | R | 0.25 |
| 2011CRE F182 | K. pneunYTM   | 2    | R | R | R | 1    |
| 2011CRE F183 | K. pneunYTM   | 2    | R | R | R | 1    |
| 2011CRE F184 | E. aerogε YTM | 2    | R | R | R | 1    |
| 2011CRE F190 | K. pneunYTM   | 128  | R | R | R | 16   |
| 2011CRE F192 | K. pneunYTM   | 2    | R | R | R | 2    |
| 2011CRE F193 | K. pneunYTM   | 4    | R | R | R | 2    |
| 2011CRE F194 | E. coli YTM   | 4    | R | R | R | 0.5  |
| 2011CRE F196 | K. pneunYTM   | 64   | R | R | R | 8    |
| 2011CRE F197 | S. marce YTM  | 128  | R | R | R | 8    |
| 2011CRE F200 | E. cloaca YTM | 16   | R | R | R | 8    |
| 2011CRE F203 | E. coli YTM   | 2    | R | R | R | 0.5  |
| 2011CRE F204 | K. pneunYTM   | >128 | R | R | R | 64   |
| 2011CRE F206 | M. morg YTM   | 0.5  | S | I | S | 4    |
| 2011CRE F209 | K. pneunYTM   | 2    | R | R | R | 1    |
| 2011CRE F211 | K. pneunYTM   | 1    | I | R | R | 1    |
| 2011CRE F212 | E. cloaca YTM | 4    | R | R | R | 0.5  |
| 2011CRE F216 | K. pneunYTM   | 2    | R | R | R | 2    |
| 2011CRE F222 | E. coli YTM   | 1    | I | R | R | 0.25 |
| 2011CRE F224 | E. aerogε YTM | 128  | R | R | R | 0.5  |
| 2011CRE F225 | E. aerogε YTM | 1    | I | R | R | 8    |
| 2011CRE F228 | C. freunc YTM | 1    | I | R | R | 1    |
| 2011CRE F229 | E. cloaca YTM | 4    | R | R | R | 8    |
| 2011CRE F230 | E. cloaca YTM | 1    | I | R | R | 4    |
| 2011CRE F231 | K. pneunYTM   | 1    | I | R | R | 0.25 |
| 2011CRE F232 | E. cloaca YTM | 2    | R | R | R | 2    |
| 2011CRE F234 | K. pneunYTM   | 1    | I | R | R | 2    |
| 2011CRE F236 | K. pneunYTM   | >128 | R | R | R | 64   |
| 2011CRE F237 | K. pneunYTM   | >128 | R | R | R | 64   |
| 2011CRE F238 | K. pneunYTM   | >128 | R | R | R | 32   |



|              |                |      |   |   |   |      |
|--------------|----------------|------|---|---|---|------|
| 2011CRE F239 | K. pneun YTM   | 1    | I | R | R | 1    |
| 2011CRE F240 | E. cloaca YTM  | 2    | R | R | R | 1    |
| 2011CRE F243 | E. cloaca YTM  | 1    | I | R | R | 0.25 |
| 2011CRE F248 | E. cloaca YTM  | 2    | R | R | R | 0.25 |
| 2011CRE F250 | K. pneun YTM   | >128 | R | R | R | 64   |
| 2011CRE F251 | K. pneun YTM   | >128 | R | R | R | 64   |
| 2011CRE F254 | K. pneun YTM   | 2    | R | R | R | 2    |
| 2011CRE F256 | K. pneun YTM   | 4    | R | R | R | 2    |
| 2011CRE F257 | K. pneun YTM   | 4    | R | R | R | 1    |
| 2011CRE F259 | K. pneun YTM   | 2    | R | R | R | 1    |
| 2011CRE F260 | E. coli YTM    | 4    | R | R | R | 0.5  |
| 2011CRE F261 | P. stuarti YTM | 4    | R | R | R | 4    |
| 2011CRE F262 | K. pneun YTM   | 2    | R | R | R | 2    |
| 2011CRE F263 | K. pneun YTM   | 4    | R | R | R | 2    |
| 2011CRE F266 | E. cloaca YTM  | 4    | R | R | R | 0.5  |
| 2011CRE F268 | E. cloaca YTM  | 4    | R | R | R | 1    |
| 2011CRE F276 | K. pneun NTU   | 2    | R | R | R | 0.25 |
| 2011CRE F277 | K. pneun NTU   | 1    | I | R | R | 0.5  |
| 2011CRE F278 | K. pneun NTU   | 2    | R | R | R | 1    |
| 2011CRE F279 | K. pneun NTU   | 2    | R | R | R | 1    |
| 2011CRE F280 | K. pneun NTU   | 32   | R | R | R | 2    |
| 2011CRE F281 | K. pneun NTU   | 1    | I | R | R | 0.5  |
| 2011CRE F282 | K. pneun NTU   | 32   | R | R | R | 4    |
| 2011CRE F283 | K. pneun NTU   | 16   | R | R | R | 2    |
| 2011CRE F284 | K. pneun NTU   | 1    | I | R | R | 0.5  |
| 2011CRE F285 | K. pneun NTY   | 2    | R | R | R | 1    |
| 2011CRE F286 | K. pneun NTY   | 8    | R | R | R | 4    |
| 2011CRE F287 | E. cloaca NTY  | 4    | R | R | R | 1    |
| 2011CRE F288 | K. pneun NTY   | 2    | R | R | R | 1    |
| 2011CRE F289 | E. coli NTY    | 8    | R | R | R | 1    |
| 2011CRE F290 | E. cloaca NTY  | 4    | R | R | R | 1    |
| 2011CRE F291 | K. pneun NTY   | 2    | R | R | R | 1    |
| 2011CRE F292 | E. aeroge NTY  | 1    | I | R | R | 0.5  |
| 2011CRE F293 | K. pneun NTY   | 1    | I | R | R | 1    |
| 2011CRE F294 | K. pneun NTY   | 2    | R | R | R | 1    |
| 2011CRE F295 | K. pneun NTY   | 2    | R | R | R | 2    |
| 2011CRE F296 | E. coli NTY    | 2    | R | R | R | 1    |
| 2011CRE F298 | K. pneun NTY   | 2    | R | R | R | 1    |
| 2011CRE F299 | E. coli NTY    | 4    | R | R | R | 0.5  |
| 2011CRE F300 | E. coli NTY    | 2    | R | R | R | 0.5  |
| 2011CRE F301 | K. pneun NTY   | 2    | R | R | R | 2    |
| 2011CRE F302 | K. pneun NTY   | >128 | R | R | R | 32   |
| 2011CRE F303 | E. coli NTY    | 4    | R | R | R | 1    |
| 2011CRE F304 | K. pneun NTY   | 2    | R | R | R | 2    |
| 2011CRE F305 | E. coli NTY    | >128 | R | R | R | 16   |
| 2011CRE F306 | K. pneun NTY   | 2    | R | R | R | 1    |

|              |              |     |   |   |   |      |
|--------------|--------------|-----|---|---|---|------|
| 2011CRE F307 | E. aerogeNTY | 2   | R | R | R | 0.5  |
| 2011CRE F308 | K. pneunNTY  | 2   | R | R | R | 1    |
| 2011CRE F309 | K. pneunNTY  | 2   | R | R | R | 2    |
| 2011CRE F310 | K. pneunNTY  | 1   | I | R | R | 1    |
| 2011CRE F311 | E. coli NTY  | 1   | I | R | R | 0.5  |
| 2011CRE F313 | K. pneunNTY  | 2   | R | R | R | 1    |
| 2011CRE F314 | K. pneunNTY  | 64  | R | R | R | 32   |
| 2011CRE F315 | K. pneunNTY  | 4   | R | R | R | 2    |
| 2011CRE F316 | K. pneunNTY  | 4   | R | R | R | 2    |
| 2011CRE F317 | K. oxytocNTY | 2   | R | R | R | 8    |
| 2011CRE F318 | K. pneunNTY  | 2   | R | R | R | 0.5  |
| 2011CRE F319 | E. coli NTY  | 2   | R | R | R | 0.5  |
| 2011CRE F320 | K. pneunNTY  | 2   | R | R | R | 1    |
| 2011CRE F321 | S. marceNTY  | 8   | R | R | R | 2    |
| 2011CRE F322 | K. pneunNTY  | 2   | R | R | R | 2    |
| 2011CRE F323 | K. pneunNTY  | 4   | R | R | R | 2    |
| 2011CRE F324 | E. coli NTY  | 2   | R | R | R | 0.5  |
| 2011CRE F326 | K. pneunNTY  | 2   | R | R | R | 0.5  |
| 2011CRE F328 | E. cloacaNTY | 1   | I | R | R | 0.25 |
| 2011CRE F330 | K. pneunNTY  | 2   | R | R | R | 0.5  |
| 2011CRE F333 | K. pneunNTY  | 2   | R | R | R | 2    |
| 2011CRE F334 | E. coli NTY  | 8   | R | R | R | 1    |
| 2011CRE F335 | K. pneunNTY  | 2   | R | R | R | 1    |
| 2011CRE F336 | K. pneunNTY  | 2   | R | R | R | 1    |
| 2011CRE F337 | S. marceNTY  | 8   | R | R | R | 8    |
| 2011CRE F338 | K. pneunNTY  | 1   | I | R | R | 1    |
| 2011CRE F339 | K. pneunNTY  | 2   | R | R | R | 2    |
| 2011CRE F340 | K. pneunNTY  | 2   | R | R | R | 0.5  |
| 2011CRE F344 | K. pneunNTY  | 2   | R | R | R | 1    |
| 2011CRE F347 | K. pneunNTY  | 2   | R | R | R | 2    |
| 2011CRE F349 | K. pneunNTY  | 2   | R | R | R | 1    |
| 2011CRE F350 | K. pneunNTY  | 1   | I | R | R | 0.5  |
| 2011CRE F351 | K. pneunNTY  | 128 | R | R | R | 32   |
| 2011CRE F352 | E. coli NTY  | 1   | I | R | R | 0.25 |
| 2011CRE F353 | E. aerogeNTY | 2   | R | R | R | 0.25 |
| 2011CRE F354 | K. pneunNTY  | 2   | R | R | R | 1    |
| 2011CRE F355 | K. pneunNTY  | 2   | R | R | R | 1    |
| 2011CRE F356 | E. cloacaNTY | 2   | R | R | R | 1    |
| 2011CRE F358 | K. pneunNTY  | 2   | R | R | R | 0.5  |
| 2011CRE F359 | S. marceNTY  | 8   | R | R | R | 2    |
| 2011CRE F360 | E. coli NTY  | 2   | R | R | R | 1    |
| 2011CRE F362 | K. pneunNTY  | 4   | R | R | R | 2    |
| 2011CRE F363 | K. pneunNTY  | 2   | R | R | R | 1    |
| 2011CRE F364 | K. pneunNTY  | 16  | R | R | R | 2    |
| 2011CRE F365 | E. cloacaNTY | 4   | R | R | R | 2    |
| 2011CRE F366 | K. pneunNTY  | 1   | I | R | R | 1    |

|              |                |      |   |   |   |      |
|--------------|----------------|------|---|---|---|------|
| 2011CRE F369 | K. pneunNTY    | 2    | R | R | R | 0.5  |
| 2011CRE F273 | E. aerogεYTM   | 1    | I | R | R | 0.5  |
| 2011CRE F275 | K. pneunYTM    | 2    | R | R | R | 0.5  |
| 2011CRE F385 | K. pneunYTM    | 2    | R | R | R | 1    |
| 2011CRE F386 | C. divers YTM  | 2    | R | R | R | 2    |
| 2011CRE F388 | E. cloaca YTM  | 1    | I | R | R | 0.25 |
| 2011CRE F389 | E. coli YTM    | 8    | R | R | R | 4    |
| 2011CRE F392 | K. pneunYTM    | 2    | R | R | R | 1    |
| 2011CRE F397 | K. pneunYTM    | 2    | R | R | R | 0.25 |
| 2011CRE F399 | K. pneunYTM    | 4    | R | R | R | 2    |
| 2011CRE F400 | E. cloaca YTM  | 4    | R | R | R | 0.5  |
| 2011CRE F403 | K. pneunYTM    | 2    | R | R | R | 1    |
| 2011CRE F404 | K. pneunYTM    | >128 | R | R | R | 32   |
| 2011CRE F406 | C. divers YTM  | 2    | R | R | R | 0.5  |
| 2011CRE F407 | E. cloaca YTM  | 1    | I | R | R | 0.5  |
| 2011CRE F410 | E. cloaca YTM  | 2    | R | R | R | 1    |
| 2011CRE F415 | E. cloaca YTM  | 1    | I | R | R | 0.25 |
| 2011CRE F421 | K. pneunYTM    | 8    | R | R | R | 2    |
| 2011CRE F423 | E. cloaca YTM  | 2    | R | R | R | 1    |
| 2011CRE F426 | E. coli YTM    | 64   | R | R | R | 8    |
| 2011CRE F427 | K. pneunYTM    | 2    | R | R | R | 1    |
| 2011CRE F429 | K. pneunYTM    | 8    | R | R | R | 4    |
| 2011CRE F431 | E. cloaca YTM  | 2    | R | R | R | 0.5  |
| 2011CRE F432 | E. cloaca YTM  | 2    | R | R | R | 2    |
| 2011CRE F434 | K. pneunYTM    | 4    | R | R | R | 4    |
| 2011CRE F435 | K. pneunYTM    | 4    | R | R | R | 4    |
| 2011CRE F436 | K. pneunYTM    | 1    | I | R | R | 0.25 |
| 2011CRE F441 | S. marce YTM   | 1    | I | R | R | 4    |
| 2011CRE F444 | K. pneunYTM    | 2    | R | R | R | 1    |
| 2011CRE F447 | E. cloaca YTM  | 0.5  | S | I | S | 2    |
| 2011CRE F448 | E. coli YTM    | 1    | I | R | R | 0.25 |
| 2011CRE F451 | K. pneunYTM    | >128 | R | R | R | 16   |
| 2011CRE F453 | E. coli YTM    | 1    | I | R | R | 2    |
| 2011CRE F457 | K. pneunYTM    | 2    | R | R | R | 0.5  |
| 2011CRE F458 | K. pneunYTM    | 2    | R | R | R | 4    |
| 2011CRE F462 | C. divers YTM  | 2    | R | R | R | 0.25 |
| 2011CRE F464 | E. aerogεYTM   | 1    | I | R | R | 1    |
| 2011CRE F466 | K. pneunYTM    | 16   | R | R | R | 2    |
| 2011CRE F467 | E. coli YTM    | 8    | R | R | R | 1    |
| 2011CRE F468 | K. pneunYTM    | 1    | I | R | R | 0.5  |
| 2011CRE F470 | K. pneunYTM    | 1    | I | R | R | 0.25 |
| 2011CRE F475 | E. coli YTM    | 2    | R | R | R | 0.5  |
| 2011CRE F477 | E. cloaca YTM  | 4    | R | R | R | 1    |
| 2011CRE F478 | E. cloaca YTM  | 1    | I | R | R | 2    |
| 2011CRE F482 | P. stuarti YTM | 16   | R | R | R | 4    |
| 2011CRE F371 | K. pneunNTY    | 2    | R | R | R | 1    |

|              |            |     |     |   |   |   |       |
|--------------|------------|-----|-----|---|---|---|-------|
| 2011CRE F372 | E. cloaca  | NTY | 1   | I | R | R | 0.5   |
| 2011CRE F373 | K. pneun   | NTY | 2   | R | R | R | 1     |
| 2011CRE F374 | K. pneun   | NTY | 2   | R | R | R | 1     |
| 2011CRE F376 | K. pneun   | NTY | 2   | R | R | R | 2     |
| 2011CRE F377 | K. pneun   | NTY | 2   | R | R | R | 1     |
| 2011CRE F378 | K. pneun   | NTY | 2   | R | R | R | 1     |
| 2011CRE F379 | K. pneun   | NTY | 2   | R | R | R | 1     |
| 2011CRE F381 | K. pneun   | NTY | 1   | I | R | R | 1     |
| 2011CRE F382 | E. coli    | NTY | 4   | R | R | R | 1     |
| 2011CRE F383 | K. pneun   | NTY | 4   | R | R | R | 1     |
| 2011CRE F384 | K. pneun   | NTY | 64  | R | R | R | 4     |
| 2012CRE F665 | E. coli    | YTM | 8   | R | R | R | 8     |
| 2012CRE F666 | E. coli    | YTM | 2   | R | R | R | 0.5   |
| 2012CRE F667 | E. aeroge  | YTM | 1   | I | R | R | 2     |
| 2012CRE F671 | K. pneun   | YTM | 2   | R | R | R | 2     |
| 2012CRE F672 | K. pneun   | YTM | 4   | R | R | R | 0.25  |
| 2012CRE F674 | K. pneun   | YTM | 128 | R | R | R | 16    |
| 2012CRE F679 | E. cloaca  | YTM | 4   | R | R | R | 4     |
| 2012CRE F680 | E. cloaca  | YTM | 1   | I | R | R | 0.5   |
| 2012CRE F681 | E. cloaca  | YTM | 2   | R | R | R | 0.5   |
| 2012CRE F684 | E. cloaca  | YTM | 2   | R | R | R | 2     |
| 2012CRE F685 | E. cloaca  | YTM | 1   | I | R | R | 1     |
| 2012CRE F687 | E. coli    | YTM | 4   | R | R | R | 1     |
| 2012CRE F688 | E. coli    | YTM | 4   | R | R | R | 4     |
| 2012CRE F690 | E. cloaca  | YTM | 1   | I | R | R | 0.5   |
| 2012CRE F695 | K. pneun   | YTM | 1   | I | R | R | 1     |
| 2012CRE F696 | K. pneun   | YTM | 1   | I | R | R | 2     |
| 2012CRE F697 | K. pneun   | YTM | 2   | R | R | R | 0.5   |
| 2012CRE F698 | K. pneun   | YTM | 2   | R | R | R | 1     |
| 2012CRE F699 | K. pneun   | YTM | 2   | R | R | R | 0.5   |
| 2012CRE F700 | K. pneun   | YTM | 2   | R | R | R | 0.5   |
| 2012CRE F701 | K. pneun   | YTM | 2   | R | R | R | 0.5   |
| 2012CRE F702 | K. pneun   | YTM | 8   | R | R | R | 2     |
| 2012CRE F703 | K. pneun   | YTM | 2   | R | R | R | 1     |
| 2012CRE F704 | K. pneun   | YTM | 2   | R | R | R | 1     |
| 2012CRE F706 | P. stuarti | YTM | 16  | R | R | R | 8     |
| 2012CRE F708 | E. coli    | YTM | 1   | I | R | R | 0.25  |
| 2012CRE F711 | E. cloaca  | YTM | 2   | R | R | R | 1     |
| 2012CRE F712 | K. pneun   | YTM | 16  | R | R | R | 4     |
| 2012CRE F714 | E. aeroge  | YTM | 1   | I | R | R | 0.5   |
| 2012CRE F717 | K. pneun   | YTM | 2   | R | R | R | 1     |
| 2012CRE F721 | K. pneun   | YTM | 2   | R | R | R | 0.5   |
| 2012CRE F722 | K. pneun   | YTM | 1   | I | R | R | 0.5   |
| 2012CRE F725 | E. coli    | YTM | 4   | R | R | R | 0.125 |
| 2012CRE F726 | E. cloaca  | YTM | 1   | I | R | R | 0.25  |
| 2012CRE F728 | K. pneun   | YTM | 1   | I | R | R | 1     |

|              |               |      |   |   |   |      |
|--------------|---------------|------|---|---|---|------|
| 2012CRE F730 | K. pneunYTM   | 128  | R | R | R | 16   |
| 2012CRE F732 | E. coli YTM   | 8    | R | R | R | 1    |
| 2012CRE F733 | K. pneunYTM   | 1    | I | R | R | 0.5  |
| 2012CRE F734 | E. cloaca YTM | 2    | R | R | R | 2    |
| 2012CRE F738 | K. pneunYTM   | 0.5  | S | I | S | 4    |
| 2012CRE F741 | K. pneunYTM   | 2    | R | R | R | 1    |
| 2012CRE F742 | K. pneunYTM   | 128  | R | R | R | 8    |
| 2012CRE F744 | K. pneunYTM   | 64   | R | R | R | 4    |
| 2012CRE F745 | E. cloaca YTM | 0.5  | S | I | S | 2    |
| 2012CRE F746 | K. pneunYTM   | 2    | R | R | R | 1    |
| 2012CRE F747 | K. pneunYTM   | 8    | R | R | R | 4    |
| 2012CRE F748 | E. cloaca YTM | 2    | R | R | R | 0.5  |
| 2012CRE F749 | P. rettge YTM | 8    | R | R | R | 8    |
| 2012CRE F750 | K. pneunYTM   | 2    | R | R | R | 1    |
| 2012CRE F752 | K. pneunYTM   | 32   | R | R | R | 16   |
| 2012CRE F756 | K. pneunYTM   | 4    | R | R | R | 1    |
| 2012CRE F757 | K. pneunYTM   | 8    | R | R | R | 2    |
| 2012CRE F760 | K. pneunYTM   | 16   | R | R | R | 2    |
| 2012CRE F761 | K. pneunYTM   | 8    | R | R | R | 1    |
| 2012CRE F506 | E. aerogεNTU  | 1    | I | R | R | 1    |
| 2012CRE F509 | K. pneunNTU   | 2    | R | R | R | 2    |
| 2012CRE F510 | K. pneunNTU   | 1    | I | R | R | 0.5  |
| 2012CRE F511 | E. coli NTU   | 1    | I | R | R | 0.5  |
| 2012CRE F512 | E. aerogεNTU  | 32   | R | R | R | 8    |
| 2012CRE F513 | E. aerogεNTU  | 16   | R | R | R | 4    |
| 2012CRE F517 | E. cloaca NTU | 2    | R | R | S | 1    |
| 2012CRE F519 | E. cloaca NTU | 1    | I | R | R | 0.5  |
| 2012CRE F520 | E. cloaca NTU | 2    | R | R | R | 0.5  |
| 2012CRE F521 | K. pneunNTU   | 64   | R | R | R | 16   |
| 2012CRE F522 | K. pneunNTU   | 1    | I | R | R | 1    |
| 2012CRE F523 | K. pneunNTU   | 2    | R | R | R | 0.5  |
| 2012CRE F524 | K. pneunNTU   | 2    | R | R | R | 0.5  |
| 2012CRE F525 | K. pneunNTU   | 2    | R | R | R | 0.5  |
| 2012CRE F528 | K. pneunNTU   | 2    | R | R | R | 2    |
| 2012CRE F529 | K. pneunNTU   | 1    | I | R | R | 0.5  |
| 2012CRE F531 | K. pneunNTU   | >128 | R | R | R | 32   |
| 2012CRE F592 | E. aerogεNTU  | 1    | I | R | R | 0.5  |
| 2012CRE F593 | E. cloaca NTU | 4    | R | R | R | 0.5  |
| 2012CRE F594 | E. cloaca NTU | 1    | I | R | R | 0.5  |
| 2012CRE F595 | E. cloaca NTU | 1    | I | R | R | 0.5  |
| 2012CRE F596 | E. cloaca NTU | 1    | I | R | R | 0.5  |
| 2012CRE F597 | E. cloaca NTU | 4    | R | R | R | 1    |
| 2012CRE F598 | E. cloaca NTU | 1    | I | R | R | 0.25 |
| 2012CRE F599 | E. cloaca NTU | 1    | I | R | R | 1    |
| 2012CRE F600 | E. cloaca NTU | 2    | R | R | R | 0.25 |
| 2012CRE F602 | E. cloaca NTU | 1    | I | R | R | 0.5  |

|              |               |      |   |   |   |      |
|--------------|---------------|------|---|---|---|------|
| 2012CRE F603 | E. cloaca NTU | 1    | I | R | R | 1    |
| 2012CRE F604 | E. coli NTU   | 2    | R | R | R | 0.25 |
| 2012CRE F605 | E. coli NTU   | 1    | I | R | R | 0.5  |
| 2012CRE F606 | K. pneunNTU   | 1    | I | R | R | 0.5  |
| 2012CRE F607 | K. pneunNTU   | 1    | I | R | R | 0.5  |
| 2012CRE F608 | K. pneunNTU   | 2    | R | R | R | 1    |
| 2012CRE F609 | K. pneunNTU   | 2    | R | R | R | 1    |
| 2012CRE F610 | K. pneunNTU   | 2    | R | R | R | 1    |
| 2012CRE F611 | K. pneunNTU   | 1    | I | R | R | 0.5  |
| 2012CRE F613 | E. aerogεNTU  | 2    | R | R | R | 1    |
| 2012CRE F614 | E. aerogεNTU  | 8    | R | R | R | 4    |
| 2012CRE F615 | E. aerogεNTU  | 1    | I | R | R | 0.25 |
| 2012CRE F617 | E. aerogεNTU  | 2    | R | R | R | 0.5  |
| 2012CRE F618 | E. aerogεNTU  | 1    | I | R | R | 0.5  |
| 2012CRE F619 | E. cloaca NTU | 8    | R | R | R | 1    |
| 2012CRE F620 | E. cloaca NTU | 2    | R | R | R | 0.5  |
| 2012CRE F621 | E. cloaca NTU | 1    | I | R | R | 0.5  |
| 2012CRE F622 | E. cloaca NTU | 1    | I | R | R | 0.5  |
| 2012CRE F623 | E. cloaca NTU | 2    | R | R | R | 0.5  |
| 2012CRE F624 | E. coli NTU   | 2    | R | R | R | 1    |
| 2012CRE F626 | E. coli NTU   | 2    | R | R | R | 0.5  |
| 2012CRE F627 | K. pneunNTU   | 4    | R | R | R | 1    |
| 2012CRE F628 | K. pneunNTU   | 4    | R | R | R | 0.5  |
| 2012CRE F629 | K. pneunNTU   | 1    | I | R | R | 1    |
| 2012CRE F631 | K. pneunNTU   | 2    | R | R | R | 0.5  |
| 2012CRE F632 | K. pneunNTU   | 64   | R | R | R | 8    |
| 2012CRE F633 | K. pneunNTU   | 4    | R | R | R | 2    |
| 2012CRE F634 | K. pneunNTU   | 2    | R | R | R | 1    |
| 2012CRE F635 | K. pneunNTU   | 1    | I | R | R | 1    |
| 2012CRE F636 | K. pneunNTU   | 2    | R | R | R | 1    |
| 2012CRE F637 | K. pneunNTU   | 1    | I | R | R | 0.5  |
| 2012CRE F639 | K. pneunNTU   | 128  | R | R | R | 4    |
| 2012CRE F642 | C. freuncNTU  | 1    | I | R | R | 0.5  |
| 2012CRE F644 | E. aerogεNTU  | 64   | R | R | R | 8    |
| 2012CRE F645 | E. cloaca NTU | 2    | R | R | R | 0.5  |
| 2012CRE F646 | E. cloaca NTU | 2    | R | R | R | 0.5  |
| 2012CRE F647 | E. cloaca NTU | 4    | R | R | R | 0.25 |
| 2012CRE F649 | E. coli NTU   | 1    | I | R | R | 0.25 |
| 2012CRE F650 | E. coli NTU   | 1    | I | R | R | 0.25 |
| 2012CRE F651 | E. coli NTU   | >128 | R | R | R | 64   |
| 2012CRE F652 | K. pneunNTU   | 2    | R | R | R | 0.5  |
| 2012CRE F653 | K. pneunNTU   | 2    | R | R | R | 1    |
| 2012CRE F654 | K. pneunNTU   | 8    | R | R | R | 1    |
| 2012CRE F655 | K. pneunNTU   | 8    | R | R | R | 1    |
| 2012CRE F656 | K. pneunNTU   | 1    | I | R | R | 0.25 |
| 2012CRE F657 | K. pneunNTU   | 2    | R | R | R | 1    |

|              |               |      |   |   |   |       |
|--------------|---------------|------|---|---|---|-------|
| 2012CRE F659 | K. pneunNTU   | 2    | R | R | R | 0.125 |
| 2012CRE F660 | K. pneunNTU   | >128 | R | R | R | 128   |
| 2012CRE F661 | M. morg NTU   | 2    | R | R | R | 4     |
| 2012CRE F663 | C. freuncNTU  | 1    | I | R | R | 2     |
| 2012CRE F664 | C. freuncNTU  | 32   | R | R | R | 2     |
| 2012CRE F763 | C. freuncNTU  | 2    | R | R | R | 0.5   |
| 2012CRE F764 | E. aerogεNTU  | 1    | I | R | R | 0.5   |
| 2012CRE F765 | E. aerogεNTU  | 1    | I | R | R | 0.5   |
| 2012CRE F766 | E. aerogεNTU  | 1    | I | R | R | 1     |
| 2012CRE F767 | E. cloaca NTU | 4    | R | R | R | 0.5   |
| 2012CRE F768 | E. cloaca NTU | 1    | I | R | R | 0.5   |
| 2012CRE F769 | E. cloaca NTU | 4    | R | R | R | 2     |
| 2012CRE F770 | E. cloaca NTU | 2    | R | R | R | 0.5   |
| 2012CRE F771 | E. cloaca NTU | 1    | I | R | R | 0.5   |
| 2012CRE F772 | E. cloaca NTU | 16   | R | R | R | 2     |
| 2012CRE F773 | E. cloaca NTU | 2    | R | R | R | 0.25  |
| 2012CRE F774 | E. coli NTU   | 8    | R | R | R | 0.25  |
| 2012CRE F775 | E. coli NTU   | 1    | I | R | R | 0.25  |
| 2012CRE F776 | K. pneunNTU   | 1    | I | R | R | 0.5   |
| 2012CRE F777 | K. pneunNTU   | 1    | I | R | R | 1     |
| 2012CRE F778 | K. pneunNTU   | 2    | R | R | R | 0.5   |
| 2012CRE F779 | K. pneunNTU   | 8    | R | R | R | 0.5   |
| 2012CRE F780 | K. pneunNTU   | 128  | R | R | R | 4     |
| 2012CRE F782 | K. pneunNTU   | 2    | R | R | R | 0.5   |
| 2012CRE F783 | K. pneunNTU   | 2    | R | R | R | 2     |
| 2012CRE F784 | K. pneunNTU   | 1    | I | R | R | 0.25  |
| 2012CRE F785 | K. pneunNTU   | 1    | I | R | R | 0.25  |
| 2012CRE F786 | K. pneunNTU   | 2    | R | R | R | 0.5   |
| 2012CRE F787 | K. pneunNTU   | 4    | R | R | R | 4     |
| 2012CRE F788 | K. pneunNTU   | 1    | I | R | R | 0.125 |
| 2012CRE F789 | K. pneunNTU   | 2    | R | R | R | 0.5   |
| 2012CRE F792 | E. aerogεNTU  | 1    | I | R | R | 0.25  |
| 2012CRE F794 | E. aerogεNTU  | 1    | I | R | R | 0.5   |
| 2012CRE F795 | E. cloaca NTU | 1    | I | R | R | 1     |
| 2012CRE F797 | E. cloaca NTU | 4    | R | R | R | 0.5   |
| 2012CRE F798 | E. cloaca NTU | 8    | R | R | R | 1     |
| 2012CRE F799 | E. coli NTU   | 1    | I | R | R | 0.125 |
| 2012CRE F800 | E. coli NTU   | 2    | R | R | R | 0.25  |
| 2012CRE F801 | K. pneunNTU   | 4    | R | R | R | 0.5   |
| 2012CRE F802 | K. pneunNTU   | 1    | I | R | R | 1     |
| 2012CRE F803 | K. pneunNTU   | 1    | I | R | R | 1     |
| 2012CRE F804 | K. pneunNTU   | 1    | I | R | R | 0.125 |
| 2012CRE F805 | K. pneunNTU   | 1    | I | R | R | 0.25  |
| 2012CRE F806 | K. pneunNTU   | 2    | R | R | R | 0.25  |
| 2012CRE F807 | K. pneunNTU   | 128  | R | R | R | 16    |
| 2012CRE G236 | C. freuncNTU  | 1    | I | R | R | 0.25  |

|             |               |      |   |   |   |       |
|-------------|---------------|------|---|---|---|-------|
| 2012CREG237 | E. aerogεNTU  | 2    | R | R | R | 0.5   |
| 2012CREG238 | E. cloaca NTU | 1    | I | R | R | 0.5   |
| 2012CREG239 | E. cloaca NTU | 4    | R | R | R | 2     |
| 2012CREG240 | E. cloaca NTU | 2    | R | R | R | 0.25  |
| 2012CREF795 | E. cloaca NTU | 1    | I | R | R | 1     |
| 2012CREF806 | K. pneunNTU   | 2    | R | R | R | 0.25  |
| 2012CREF807 | K. pneunNTU   | 128  | R | R | R | 16    |
| 2012CREG273 | E. cloaca NTU | 2    | R | R | R | 2     |
| 2012CREG297 | E. aerogεNTU  | 16   | R | R | R | 4     |
| 2012CREG321 | K. pneunNTU   | 2    | R | R | R | 0.25  |
| 2012CREG322 | K. pneunNTU   | 4    | R | R | R | 0.125 |
| 2012CREG018 | K. pneunNTU   | 2    | R | R | R | 0.5   |
| 2012CREG051 | K. pneunNTU   | 2    | R | R | R | 0.25  |
| 2012CRE     | E. cloaca NTU | 1    | I | R | R | 0.5   |
| 2012CRE     | S. marce NTU  | 4    | R | R | R | 1     |
| 2012CRE     | E. coli NTU   | 4    | R | R | R | 0.125 |
| 2012CRE     | E. aerogεNTU  | 1    | I | R | R | 0.5   |
| 2012CRE     | E. coli NTU   | 8    | R | R | R | 0.5   |
| 2012CRE     | E. coli NTU   | 32   | R | R | R | 2     |
| 2012CREG572 | K. planticNTU | 4    | R | R | R | 1     |
| 2012CREG573 | E. coli NTU   | 4    | R | R | R | 2     |
| 2012CRE     | K. pneunNTU   | 128  | R | R | R | 16    |
| 2012CREG324 | E. cloaca NTU | 4    | R | R | R | 0.5   |
| 2012CREG329 | E. aerogεNTU  | 1    | I | R | R | 0.5   |
| 2012CREG330 | M. morg NTU   | 0.5  | S | I | S | 2     |
| 2012CREG486 | K. pneunNTU   | 4    | R | R | R | 1     |
| 2012CREG560 | E. cloaca NTU | 8    | R | R | R | 0.25  |
| 2012CREG566 | E. cloaca NTU | 2    | R | R | R | 0.25  |
| 2012CREG711 | K. pneunNTU   | 2    | R | R | R | 0.5   |
| 2012CREG712 | K. pneunNTU   | 4    | R | R | R | 1     |
| 2012CREG713 | E. coli NTU   | 32   | R | R | R | 8     |
| 2012CREG714 | E. coli NTU   | 2    | R | R | R | 1     |
| 2012CREG715 | K. pneunNTU   | 4    | R | R | R | 1     |
| 2012CREG010 | K. pneunNTY   | 2    | R | R | R | 0.5   |
| 2012CREG011 | K. pneunNTY   | 2    | R | R | R | 0.25  |
| 2012CREG012 | K. pneunNTY   | 4    | R | R | R | 2     |
| 2012CREG013 | E. coli NTY   | 2    | R | R | R | 0.5   |
| 2012CREG014 | E. coli NTY   | 2    | R | R | R | 0.125 |
| 2012CREG015 | K. pneunNTY   | 2    | R | R | R | 0.5   |
| 2012CREG016 | K. pneunNTY   | 2    | R | R | R | 0.5   |
| 2012CREG017 | K. pneunNTY   | 1    | I | R | R | 0.25  |
| 2012CREG018 | K. pneunNTY   | 2    | R | R | R | 0.5   |
| 2012CREG019 | E. coli NTY   | 2    | R | R | R | 0.5   |
| 2012CREG020 | K. pneunNTY   | 4    | R | R | R | 0.5   |
| 2012CREG021 | K. pneunNTY   | >128 | R | R | R | 32    |
| 2012CREG022 | E. coli NTY   | 2    | R | R | R | 0.5   |



|             |               |      |   |   |   |      |
|-------------|---------------|------|---|---|---|------|
| 2012CREG023 | K. pneunNTY   | 8    | R | R | R | 2    |
| 2012CREG024 | K. pneunNTY   | 4    | R | R | R | 0.5  |
| 2012CREG025 | K. pneunNTY   | 4    | R | R | R | 0.5  |
| 2012CREG026 | E. cloaca NTY | 1    | I | R | R | 0.25 |
| 2012CREG027 | E. cloaca NTY | 4    | R | R | R | 2    |
| 2012CREG028 | E. coli NTY   | 128  | R | R | R | 16   |
| 2012CREG029 | E. cloaca NTY | 64   | R | R | R | 8    |
| 2012CREG030 | E. coli NTY   | 2    | R | R | R | 1    |
| 2012CREG031 | K. pneunNTY   | 2    | R | R | R | 1    |
| 2012CREG032 | K. pneunNTY   | 2    | R | R | R | 1    |
| 2012CREG033 | K. pneunNTY   | 2    | R | R | R | 0.5  |
| 2012CREG034 | K. pneunNTY   | 1    | I | R | R | 1    |
| 2012CREG035 | K. pneunNTY   | 2    | R | R | R | 1    |
| 2012CREG037 | K. pneunNTY   | 4    | R | R | R | 0.5  |
| 2012CREG038 | K. pneunNTY   | 2    | R | R | R | 1    |
| 2012CREG039 | K. pneunNTY   | 2    | R | R | R | 0.5  |
| 2012CREG041 | K. pneunNTY   | 1    | I | R | R | 0.5  |
| 2012CREG042 | K. pneunNTY   | 1    | I | R | R | 1    |
| 2012CREG043 | K. pneunNTY   | 1    | I | R | R | 0.5  |
| 2012CREG044 | K. pneunNTY   | 1    | I | R | R | 1    |
| 2012CREG046 | K. pneunNTY   | 4    | R | R | R | 1    |
| 2012CREG047 | K. pneunNTY   | 1    | I | R | R | 0.5  |
| 2012CREG048 | K. pneunNTY   | 2    | R | R | R | 1    |
| 2012CREG049 | K. pneunNTY   | 2    | R | R | R | 1    |
| 2012CREG050 | K. pneunNTY   | 2    | R | R | R | 1    |
| 2012CREG051 | K. pneunNTY   | 2    | R | R | R | 0.25 |
| 2012CREG053 | K. pneunNTY   | 2    | R | R | R | 0.25 |
| 2012CREG054 | K. pneunNTY   | 2    | R | R | R | 0.25 |
| 2012CREG055 | E. aerogēNTY  | 1    | I | R | R | 0.5  |
| 2012CREG056 | K. pneunNTY   | 2    | R | R | R | 0.25 |
| 2012CREG057 | E. coli NTY   | 1    | I | R | R | 0.25 |
| 2012CREG058 | K. pneunNTY   | 4    | R | R | R | 0.25 |
| 2012CREG059 | K. pneunNTY   | 2    | R | R | R | 1    |
| 2012CREG060 | K. pneunNTY   | 2    | R | R | R | 4    |
| 2012CREG061 | K. pneunNTY   | 2    | R | R | R | 0.25 |
| 2012CREG062 | K. pneunNTY   | 2    | R | R | R | 0.5  |
| 2012CREG064 | K. pneunNTY   | 2    | R | R | R | 2    |
| 2012CREG065 | K. pneunNTY   | 2    | R | R | R | 0.5  |
| 2012CREG066 | K. pneunNTY   | 1    | I | R | R | 0.25 |
| 2012CREG068 | K. pneunNTY   | >128 | R | R | R | 16   |
| 2012CREG069 | K. pneunNTY   | 2    | R | R | R | 2    |
| 2012CREG070 | K. pneunNTY   | 2    | R | R | R | 0.5  |
| 2012CREG072 | K. pneunNTY   | 2    | R | R | R | 1    |
| 2012CREG073 | K. pneunNTY   | 4    | R | R | R | 0.5  |
| 2012CREG075 | K. pneunNTY   | 1    | I | R | R | 1    |
| 2012CREG077 | E. coli NTY   | 2    | R | R | R | 0.5  |

|             |               |      |   |   |   |       |
|-------------|---------------|------|---|---|---|-------|
| 2012CREG078 | K. pneunNTY   | 2    | R | R | R | 0.5   |
| 2012CREG079 | K. pneunNTY   | 4    | R | R | R | 0.5   |
| 2012CREG080 | E. coli NTY   | 2    | R | R | R | 0.25  |
| 2012CREG081 | K. pneunNTY   | 4    | R | R | R | 0.5   |
| 2012CREG082 | K. pneunNTY   | 2    | R | R | R | 0.5   |
| 2012CREG083 | K. pneunNTY   | 2    | R | R | R | 1     |
| 2012CREG084 | K. pneunNTY   | 4    | R | R | R | 1     |
| 2012CREG085 | K. pneunNTY   | 2    | R | R | R | 0.5   |
| 2012CREG086 | K. pneunNTY   | 2    | R | R | R | 1     |
| 2012CREG087 | K. pneunNTY   | 2    | R | R | R | 0.5   |
| 2012CREG089 | E. cloaca NTY | 2    | R | R | R | 1     |
| 2012CREG090 | E. cloaca NTY | 2    | R | R | R | 2     |
| 2012CREG091 | E. coli NTY   | 2    | R | R | R | 0.25  |
| 2012CREG092 | E. cloaca NTY | 2    | R | R | R | 1     |
| 2012CREG093 | E. coli NTY   | 2    | R | R | R | 0.5   |
| 2012CREG094 | K. pneunNTY   | 64   | R | R | R | 4     |
| 2012CREG095 | E. cloaca NTY | 1    | I | R | R | 1     |
| 2012CREG096 | K. pneunNTY   | 2    | R | R | R | 0.5   |
| 2012CREG097 | K. pneunNTY   | 2    | R | R | R | 0.5   |
| 2012CREG098 | E. cloaca NTY | 4    | R | R | R | 4     |
| 2012CREG099 | E. coli NTY   | 2    | R | R | R | 0.5   |
| 2012CREG100 | E. cloaca NTY | 4    | R | R | R | 1     |
| 2012CREG101 | K. pneunNTY   | 4    | R | R | R | 0.125 |
| 2012CREG102 | K. pneunNTY   | 8    | R | R | R | 0.25  |
| 2012CREG103 | E. coli NTY   | 1    | I | R | R | 0.25  |
| 2012CREG104 | E. coli NTY   | 32   | R | R | R | 8     |
| 2012CREG105 | K. pneunNTY   | 2    | R | R | R | 2     |
| 2012CREG242 | E. cloaca NTU | 2    | R | R | R | 0.5   |
| 2012CREG243 | E. cloaca NTU | 4    | R | R | R | 0.5   |
| 2012CREG244 | E. coli NTU   | 4    | R | R | R | 0.125 |
| 2012CREG245 | K. pneunNTU   | 1    | I | R | R | 0.5   |
| 2012CREG246 | K. pneunNTU   | 2    | R | R | R | 0.25  |
| 2012CREG247 | K. pneunNTU   | 8    | R | R | R | 1     |
| 2012CREG248 | K. pneunNTU   | 2    | R | R | R | 0.25  |
| 2012CREG249 | K. pneunNTU   | 2    | R | R | R | 1     |
| 2012CREG251 | K. pneunNTU   | 1    | I | R | R | 0.5   |
| 2012CREG252 | K. pneunNTU   | 4    | R | R | R | 0.5   |
| 2012CREG253 | K. pneunNTU   | 2    | R | R | R | 1     |
| 2012CREG254 | K. pneunNTU   | >128 | R | R | R | 64    |
| 2012CREG255 | K. planticNTU | 2    | R | R | R | 1     |
| 2012CREG256 | K. pneunNTU   | 2    | R | R | R | 2     |
| 2012CREG257 | K. pneunNTU   | 8    | R | R | R | 1     |
| 2012CREG258 | K. pneunNTU   | 4    | R | R | R | 0.5   |
| 2012CREG259 | S. marce NTU  | 4    | R | R | R | 2     |
| 2012CREG260 | E. aerog€NTU  | 1    | I | R | R | 0.25  |
| 2012CREG261 | E. aerog€NTU  | 2    | R | R | R | 0.5   |

|             |                 |      |   |   |   |      |
|-------------|-----------------|------|---|---|---|------|
| 2012CREG262 | E. cloaca NTU   | 1    | I | R | R | 0.5  |
| 2012CREG263 | E. cloaca NTU   | 1    | I | R | R | 0.5  |
| 2012CREG264 | K. pneun NTU    | 2    | R | R | R | 0.5  |
| 2012CREG265 | K. pneun NTU    | 1    | I | R | R | 1    |
| 2012CREG266 | K. pneun NTU    | >128 | R | R | R | 32   |
| 2012CREG267 | K. pneun NTU    | 1    | I | R | R | 0.5  |
| 2012CREG268 | K. pneun NTU    | 2    | R | R | R | 2    |
| 2012CREG269 | K. pneun NTU    | 2    | R | R | R | 1    |
| 2012CREG270 | K. pneun NTU    | 1    | I | R | R | 1    |
| 2012CREG271 | K. pneun NTU    | >128 | R | R | R | 16   |
| 2012CREG273 | E. cloaca NTU   | 2    | R | R | R | 2    |
| 2012CREG274 | E. cloaca NTU   | 2    | R | R | R | 0.5  |
| 2012CREG275 | E. aerogε NTU   | 4    | R | R | R | 4    |
| 2012CREG276 | E. aerogε NTU   | 1    | I | R | R | 0.5  |
| 2012CREG279 | E. cloaca NTU   | 1    | I | R | R | 0.25 |
| 2012CREG282 | E. cloaca NTU   | 2    | R | R | R | 0.5  |
| 2012CREG284 | E. coli NTU     | 1    | I | R | R | 0.25 |
| 2012CREG285 | E. coli NTU     | 8    | R | R | R | 0.5  |
| 2012CREG286 | K. pneun NTU    | 2    | R | R | R | 0.5  |
| 2012CREG287 | K. pneun NTU    | 2    | R | R | R | 0.5  |
| 2012CREG288 | K. pneun NTU    | 1    | I | R | R | 1    |
| 2012CREG289 | S. marce NTU    | 2    | R | R | R | 1    |
| 2012CREG290 | S. marce NTU    | 2    | R | R | R | 1    |
| 2012CREG291 | K. pneun NTU    | 4    | R | R | R | 0.5  |
| 2012CREG292 | K. pneun NTU    | 32   | R | R | R | 1    |
| 2012CREG293 | E. cloaca NTU   | 16   | R | R | R | 0.5  |
| 2012CREG294 | K. pneun NTU    | 128  | R | R | R | 8    |
| 2012CREG295 | K. pneun NTU    | 128  | R | R | R | 0.25 |
| 2012CREG296 | K. pneun NTU    | 2    | R | R | R | 1    |
| 2012CREG297 | E. aerogε NTU   | 8    | R | R | R | 4    |
| 2012CREG300 | E. cloaca NTU   | 1    | I | R | R | 1    |
| 2012CREG301 | E. cloaca NTU   | 2    | R | R | R | 1    |
| 2012CREG302 | E. cloaca NTU   | 1    | I | R | R | 0.25 |
| 2012CREG303 | E. cloaca NTU   | 1    | I | R | R | 0.5  |
| 2012CREG304 | E. cloaca NTU   | 1    | I | R | R | 0.25 |
| 2012CREG305 | E. cloaca NTU   | 2    | R | R | R | 0.25 |
| 2012CREG337 | K. pneun 台大新竹   | 1    | I | R | R | 1    |
| 2012CREG342 | K. pneun 台大新竹   | >128 | R | R | R | 32   |
| 2012CREG346 | P. stuarti 台大新竹 | 0.5  | S | I | S | 8    |
| 2012CREG354 | K. pneun 台大新竹   | 2    | R | R | R | 0.5  |
| 2012CREG361 | E. cloaca 台大新竹  | 4    | R | R | R | 0.5  |
| 2012CREG362 | K. pneun 台大新竹   | 1    | I | R | R | 2    |
| 2012CREG367 | K. pneun 台大新竹   | 1    | I | R | R | 1    |
| 2012CREG369 | E. coli 台大新竹    | 2    | R | R | R | 1    |
| 2012CREG371 | C. freunc 台大新竹  | 1    | I | R | R | 2    |
| 2012CREG372 | E. cloaca 台大新竹  | 1    | I | R | R | 1    |

|             |               |      |   |   |   |      |
|-------------|---------------|------|---|---|---|------|
| 2012CREG455 | E. cloaca YTM | 2    | R | R | R | 1    |
| 2012CREG456 | E. cloaca YTM | 2    | R | R | R | 0.5  |
| 2012CREG457 | E. coli YTM   | 1    | I | R | R | 0.25 |
| 2012CREG459 | E. cloaca YTM | 4    | R | R | R | 2    |
| 2012CREG460 | E. cloaca YTM | 1    | I | R | R | 1    |
| 2012CREG461 | K. pneun YTM  | 8    | R | R | R | 0.5  |
| 2012CREG462 | E. cloaca YTM | 2    | R | R | R | 1    |
| 2012CREG463 | K. pneun YTM  | 2    | R | R | R | 1    |
| 2012CREG465 | E. cloaca YTM | 4    | R | R | R | 1    |
| 2012CREG466 | E. cloaca YTM | 2    | R | R | R | 1    |
| 2012CREG467 | K. pneun YTM  | 2    | R | R | R | 1    |
| 2012CREG471 | E. cloaca YTM | 2    | R | R | R | 0.5  |
| 2012CREG472 | K. pneun YTM  | >128 | R | R | R | 64   |
| 2012CREG473 | K. pneun YTM  | 2    | R | R | R | 1    |
| 2012CREG474 | K. pneun YTM  | >128 | R | R | R | 64   |
| 2012CREG477 | E. cloaca YTM | 4    | R | R | R | 0.5  |
| 2012CREG478 | E. cloaca YTM | 4    | R | R | R | 0.5  |
| 2012CREG479 | K. pneun YTM  | 2    | R | R | R | 1    |
| 2012CREG481 | E. coli YTM   | 32   | R | R | R | 2    |
| 2012CREG482 | E. cloaca YTM | 2    | R | R | R | 1    |
| 2012CREG487 | K. pneun YTM  | 2    | R | R | R | 1    |
| 2012CREG488 | P. rettge YTM | 16   | R | R | R | 8    |
| 2012CREG492 | K. pneun YTM  | 16   | R | R | R | 8    |
| 2012CREG494 | E. coli YTM   | 4    | R | R | R | 0.5  |
| 2012CREG496 | K. pneun YTM  | 2    | R | R | R | 1    |
| 2012CREG497 | K. pneun YTM  | 4    | R | R | R | 1    |
| 2012CREG498 | C. freunc YTM | 64   | R | R | R | 16   |
| 2012CREG501 | K. pneun YTM  | 2    | R | R | R | 0.5  |
| 2012CREG503 | K. pneun YTM  | 2    | R | R | R | 0.5  |
| 2012CREG504 | K. pneun YTM  | 2    | R | R | R | 0.5  |
| 2012CREG509 | K. pneun YTM  | 2    | R | R | R | 2    |
| 2012CREG511 | K. pneun YTM  | 64   | R | R | R | 8    |
| 2012CREG515 | E. cloaca YTM | 1    | I | R | R | 1    |
| 2012CREG516 | E. cloaca YTM | 1    | I | R | R | 0.5  |
| 2012CREG517 | K. pneun YTM  | >128 | R | R | R | 64   |
| 2012CREG518 | E. cloaca YTM | 4    | R | R | R | 0.5  |
| 2012CREG520 | M. morg YTM   | >128 | R | R | R | 8    |
| 2012CREG521 | K. pneun YTM  | 2    | R | R | R | 1    |
| 2012CREG523 | K. pneun YTM  | 1    | I | R | R | 0.25 |
| 2012CREG524 | E. cloaca YTM | 4    | R | R | R | 4    |
| 2012CREG525 | E. cloaca YTM | 4    | R | R | R | 1    |
| 2012CREG526 | E. aeroge YTM | 4    | R | R | R | 1    |
| 2012CREG530 | K. pneun YTM  | 2    | R | R | R | 1    |
| 2012CREG532 | E. aeroge YTM | 2    | R | R | R | 2    |
| 2012CREG535 | E. coli YTM   | 8    | R | R | R | 0.5  |
| 2012CREG536 | E. coli YTM   | 4    | R | R | R | 0.5  |

|             |               |     |   |   |   |      |
|-------------|---------------|-----|---|---|---|------|
| 2012CREG537 | E. cloaca YTM | 0.5 | S | I | S | 2    |
| 2012CREG542 | E. coli YTM   | 8   | R | R | R | 1    |
| 2012CREG543 | K. pneun YTM  | 64  | R | R | R | 8    |
| 2012CREG545 | K. pneun YTM  | 2   | R | R | R | 0.5  |
| 2012CREG546 | K. pneun YTM  | 2   | R | R | R | 1    |
| 2012CREG549 | K. pneun YTM  | 4   | R | R | R | 0.5  |
| 2012CREG722 | E. cloaca YTM | 4   | R | R | R | 1    |
| 2012CREG724 | K. pneun YTM  | 4   | R | R | R | 1    |
| 2012CREG727 | K. pneun YTM  | 8   | R | R | R | 1    |
| 2012CREG729 | E. cloaca YTM | 4   | R | R | R | 2    |
| 2012CREG731 | K. pneun YTM  | 8   | R | R | R | 1    |
| 2012CREG732 | E. coli YTM   | 4   | R | R | R | 0.5  |
| 2012CREG734 | K. pneun YTM  | 32  | R | R | R | 4    |
| 2012CREG736 | E. aeroge YTM | 1   | I | R | R | 1    |
| 2012CREG737 | K. pneun NTY  | 2   | R | R | R | 1    |
| 2012CREG738 | K. pneun NTY  | 2   | R | R | R | 0.5  |
| 2012CREG739 | E. aeroge NTY | 1   | I | R | R | 0.5  |
| 2012CREG740 | K. pneun NTY  | 2   | R | R | R | 1    |
| 2012CREG741 | K. pneun NTY  | 1   | I | R | R | 0.5  |
| 2012CREG742 | E. cloaca NTY | 4   | R | R | R | 0.5  |
| 2012CREG743 | K. pneun NTY  | 2   | R | R | R | 0.5  |
| 2012CREG744 | E. coli NTY   | 2   | R | R | R | 0.5  |
| 2012CREG745 | E. cloaca NTY | 2   | R | R | R | 1    |
| 2012CREG746 | C. freunc NTY | 8   | R | R | R | 4    |
| 2012CREG747 | K. pneun NTY  | 4   | R | R | R | 1    |
| 2012CREG748 | E. cloaca NTY | 4   | R | R | R | 1    |
| 2012CREG749 | K. pneun NTY  | 2   | R | R | R | 0.5  |
| 2012CREG750 | K. pneun NTY  | 2   | R | R | R | 0.25 |
| 2012CREG751 | K. pneun NTY  | 4   | R | R | R | 2    |
| 2012CREG753 | K. pneun NTY  | 2   | R | R | R | 0.5  |
| 2012CREG754 | E. coli NTY   | 2   | R | R | R | 1    |
| 2012CREG755 | K. pneun NTY  | 2   | R | R | R | 0.25 |
| 2012CREG756 | K. pneun NTY  | 2   | R | R | R | 1    |
| 2012CREG757 | K. pneun NTY  | 2   | R | R | R | 1    |
| 2012CREG758 | K. pneun NTY  | 128 | R | R | R | 32   |
| 2012CREG759 | K. pneun NTY  | 4   | R | R | R | 1    |
| 2012CREG760 | K. pneun NTY  | 8   | R | R | R | 1    |
| 2012CREG761 | E. cloaca NTY | 2   | R | R | R | 0.5  |
| 2012CREG762 | E. cloaca NTY | 8   | R | R | R | 4    |
| 2012CREG763 | E. cloaca NTY | 1   | I | R | R | 0.25 |
| 2012CREG764 | E. cloaca NTY | 8   | R | R | R | 1    |
| 2012CREG765 | K. pneun NTY  | 4   | R | R | R | 0.25 |
| 2012CREG766 | K. pneun NTY  | 2   | R | R | R | 1    |
| 2012CREG767 | K. pneun NTY  | 2   | R | R | R | 0.5  |
| 2012CREG768 | K. pneun NTY  | 4   | R | R | R | 0.5  |
| 2012CREG769 | E. coli NTY   | 128 | R | R | R | 16   |

|             |           |      |     |   |   |   |       |
|-------------|-----------|------|-----|---|---|---|-------|
| 2012CREG770 | E. cloaca | NTY  | 4   | R | R | R | 0.5   |
| 2012CREG771 | K. pneun  | NTY  | 4   | R | R | R | 0.5   |
| 2012CREG772 | E. cloaca | NTY  | 4   | R | R | R | 1     |
| 2012CREG773 | E. coli   | NTY  | 2   | R | R | R | 0.06  |
| 2012CREG774 | K. pneun  | NTY  | 2   | R | R | R | 1     |
| 2012CREG775 | E. coli   | NTY  | 4   | R | R | R | 2     |
| 2012CREG776 | K. pneun  | NTY  | 8   | R | R | R | 0.5   |
| 2012CREG777 | K. pneun  | NTY  | 128 | R | R | R | 8     |
| 2012CREG778 | E. cloaca | NTY  | 2   | R | R | R | 0.5   |
| 2012CREG779 | K. pneun  | NTY  | 2   | R | R | R | 1     |
| 2012CREG780 | K. pneun  | NTY  | 4   | R | R | R | 1     |
| 2012CREG781 | K. pneun  | NTY  | 2   | R | R | R | 0.5   |
| 2012CREG782 | K. pneun  | NTY  | 16  | R | R | R | 1     |
| 2012CREG783 | K. pneun  | NTY  | 128 | R | R | R | 8     |
| 2012CREG784 | K. pneun  | NTY  | 4   | R | R | R | 0.5   |
| 2012CREG785 | K. pneun  | NTY  | 2   | R | R | R | 1     |
| 2012CREG786 | E. cloaca | NTY  | 2   | R | R | R | 0.5   |
| 2012CREG787 | E. cloaca | NTY  | 4   | R | R | R | 2     |
| 2012CREG788 | K. pneun  | NTY  | 16  | R | R | R | 0.5   |
| 2012CREG789 | K. pneun  | NTY  | 1   | I | R | R | 0.5   |
| 2012CREG790 | E. cloaca | NTY  | 4   | R | R | R | 0.25  |
| 2012CREG791 | K. pneun  | NTY  | 16  | R | R | R | 0.5   |
| 2012CREG792 | S. marce  | NTY  | 32  | R | R | R | 8     |
| 2012CREG793 | K. pneun  | NTY  | 4   | R | R | R | 0.25  |
| 2012CREG794 | E. coli   | NTY  | 4   | R | R | R | 0.5   |
| 2012CREG717 | E. coli   | 台大新竹 | 16  | R | R | R | 4     |
| 2012CREG272 | E. cloaca | NTU  | 1   | I | R | R | 0.5   |
| 2012CREG306 | E. cloaca | NTU  | 2   | R | R | R | 8     |
| 2012CREG307 | E. coli   | NTU  | 4   | R | R | R | 0.25  |
| 2012CREG308 | E. coli   | NTU  | 2   | R | R | R | 0.125 |
| 2012CREG310 | K. pneun  | NTU  | 2   | R | R | R | 0.25  |
| 2012CREG311 | K. pneun  | NTU  | 2   | R | R | R | 0.5   |
| 2012CREG312 | K. pneun  | NTU  | 2   | R | R | R | 0.25  |
| 2012CREG313 | K. pneun  | NTU  | 2   | R | R | R | 0.25  |
| 2012CREG314 | K. pneun  | NTU  | 32  | R | R | R | 2     |
| 2012CREG315 | K. pneun  | NTU  | 4   | R | R | R | 1     |
| 2012CREG316 | K. pneun  | NTU  | 2   | R | R | R | 0.25  |
| 2012CREG317 | K. pneun  | NTU  | 2   | R | R | R | 0.25  |
| 2012CREG318 | K. pneun  | NTU  | 2   | R | R | R | 2     |
| 2012CREG319 | K. pneun  | NTU  | 2   | R | R | R | 0.25  |
| 2012CREG320 | S. marce  | NTU  | 2   | R | R | R | 0.5   |
| 2012CREG321 | K. pneun  | NTU  | 2   | R | R | R | 0.5   |
| 2012CREG322 | K. pneun  | NTU  | 2   | R | R | R | 0.25  |
| 2012CREG576 | E. aeroge | NTU  | 1   | I | R | R | 0.5   |
| 2012CREG577 | E. cloaca | NTU  | 1   | I | R | R | 0.25  |
| 2012CREG578 | E. cloaca | NTU  | 1   | I | R | R | 0.25  |

|             |               |    |   |   |   |      |
|-------------|---------------|----|---|---|---|------|
| 2012CREG579 | E. cloaca NTU | 1  | I | R | R | 0.5  |
| 2012CREG580 | E. cloaca NTU | 1  | I | R | R | 0.25 |
| 2012CREG581 | E. coli NTU   | 1  | I | R | R | 0.25 |
| 2012CREG582 | E. coli NTU   | 1  | I | R | R | 0.25 |
| 2012CREG583 | K. pneunNTU   | 2  | R | R | R | 2    |
| 2012CREG584 | K. pneunNTU   | 8  | R | R | R | 8    |
| 2012CREG586 | K. pneunNTU   | 1  | I | R | R | 0.5  |
| 2012CREG587 | K. pneunNTU   | 2  | R | R | R | 1    |
| 2012CREG588 | K. pneunNTU   | 64 | R | R | R | 4    |
| 2012CREG589 | K. pneunNTU   | 1  | I | R | R | 0.5  |
| 2012CREG590 | K. pneunNTU   | 8  | R | R | R | 1    |
| 2012CREG591 | C. freuncNTU  | 1  | I | R | R | 0.5  |
| 2012CREG592 | E. aerogεNTU  | 1  | I | R | R | 0.5  |
| 2012CREG594 | E. cloaca NTU | 1  | I | R | R | 0.5  |
| 2012CREG596 | E. cloaca NTU | 2  | R | R | R | 1    |
| 2012CREG598 | E. cloaca NTU | 2  | R | R | R | 0.25 |
| 2012CREG599 | E. coli NTU   | 1  | I | R | R | 0.25 |
| 2012CREG600 | E. coli NTU   | 8  | R | R | R | 0.5  |
| 2012CREG601 | K. pneunNTU   | 4  | R | R | R | 1    |
| 2012CREG602 | K. pneunNTU   | 1  | I | R | R | 1    |
| 2012CREG603 | K. pneunNTU   | 1  | I | R | R | 0.25 |
| 2012CREG604 | K. pneunNTU   | 2  | R | R | R | 1    |
| 2012CREG605 | K. pneunNTU   | 2  | R | R | R | 1    |
| 2012CREG606 | K. pneunNTU   | 1  | I | R | R | 0.5  |
| 2012CREG607 | K. pneunNTU   | 2  | R | R | R | 0.5  |
| 2012CREG608 | E. aerogεNTU  | 1  | I | R | R | 0.5  |
| 2012CREG609 | E. cloaca NTU | 1  | I | R | R | 0.5  |
| 2012CREG453 | K. pneunNTU   | 2  | R | R | R | 0.5  |
| 2012CREG597 | E. cloaca NTU | 2  | R | R | R | 0.25 |
| 2012CREG610 | E. coli NTU   | 4  | R | R | R | 0.25 |
| 2012CREG611 | K. pneunNTU   | 2  | R | R | R | 1    |
| 2012CREG612 | K. pneunNTU   | 2  | R | R | R | 0.5  |
| 2012CREG613 | K. pneunNTU   | 4  | R | R | R | 1    |
| 2012CREG614 | K. pneunNTU   | 4  | R | R | R | 0.25 |
| 2012CREG615 | K. pneunNTU   | 32 | R | R | R | 2    |
| 2012CREG616 | K. pneunNTU   | 2  | R | R | R | 1    |
| 2012CREG617 | K. pneunNTU   | 2  | R | R | R | 0.5  |
| 2012CREG618 | K. pneunNTU   | 4  | R | R | R | 1    |
| 2012CREG619 | K. pneunNTU   | 2  | R | R | R | 1    |
| 2012CREG620 | K. pneunNTU   | 4  | R | R | R | 1    |
| 2012CREG621 | K. pneunNTU   | 4  | R | R | R | 0.5  |
| 2012CREG622 | K. pneunNTU   | 1  | I | R | R | 0.25 |
| 2012CREG624 | C. freuncNTU  | 1  | I | R | R | 0.25 |
| 2012CREG625 | C. freuncNTU  | 4  | R | R | R | 1    |
| 2012CREG626 | E. aerogεNTU  | 1  | I | R | R | 2    |
| 2012CREG627 | E. aerogεNTU  | 1  | I | R | R | 0.5  |

|             |               |      |   |   |   |       |
|-------------|---------------|------|---|---|---|-------|
| 2012CREG628 | E. aerogεNTU  | 1    | I | R | R | 2     |
| 2012CREG629 | E. aerogεNTU  | 2    | R | R | R | 1     |
| 2012CREG630 | E. aerogεNTU  | 8    | R | R | R | 2     |
| 2012CREG631 | E. cloaca NTU | 8    | R | R | R | 1     |
| 2012CREG632 | E. cloaca NTU | 2    | R | R | R | 0.5   |
| 2012CREG633 | E. cloaca NTU | 8    | R | R | R | 2     |
| 2012CREG635 | E. coli NTU   | 2    | R | R | R | 2     |
| 2012CREG636 | E. coli NTU   | 8    | R | R | R | 1     |
| 2012CREG637 | K. pneunNTU   | 16   | R | R | R | 4     |
| 2012CREG638 | K. pneunNTU   | 2    | R | R | R | 1     |
| 2012CREG639 | K. pneunNTU   | 1    | I | R | R | 0.5   |
| 2012CREG640 | K. pneunNTU   | >128 | R | R | R | 64    |
| 2012CREG641 | K. pneunNTU   | 1    | I | R | R | 0.25  |
| 2012CREG642 | K. pneunNTU   | 2    | R | R | R | 1     |
| 2012CREG643 | K. pneunNTU   | 2    | R | R | R | 0.5   |
| 2012CREG644 | K. pneunNTU   | 2    | R | R | R | 0.5   |
| 2012CREG645 | K. pneunNTU   | 4    | R | R | R | 0.5   |
| 2012CREG646 | K. pneunNTU   | >128 | R | R | R | 16    |
| 2012CREG648 | K. pneunNTU   | 1    | I | R | R | 0.5   |
| 2012CREG649 | K. pneunNTU   | 2    | R | R | R | 0.5   |
| 2012CREG650 | E. aerogεNTU  | 2    | R | R | R | 0.25  |
| 2012CREG651 | E. aerogεNTU  | 32   | R | R | R | 8     |
| 2012CREG653 | E. cloaca NTU | 4    | R | R | R | 0.25  |
| 2012CREG654 | E. cloaca NTU | 2    | R | R | R | 0.5   |
| 2012CREG656 | E. coli NTU   | 4    | R | R | R | 0.125 |
| 2012CREG657 | E. coli NTU   | 2    | R | R | R | 0.25  |
| 2012CREG658 | E. coli NTU   | 32   | R | R | R | 4     |
| 2012CREG659 | K. pneunNTU   | 2    | R | R | R | 0.5   |
| 2012CREG660 | K. pneunNTU   | 1    | I | R | R | 0.5   |
| 2012CREG661 | K. pneunNTU   | 2    | R | R | R | 0.5   |
| 2012CREG662 | K. pneunNTU   | 1    | I | R | R | 0.5   |
| 2012CREG663 | K. pneunNTU   | 128  | R | R | R | 32    |
| 2012CREG664 | K. pneunNTU   | 16   | R | R | R | 2     |
| 2012CREG665 | K. pneunNTU   | 4    | R | R | R | 0.5   |
| 2012CREG666 | S. marce NTU  | 8    | R | R | R | 2     |
| 2012CREG667 | S. marce NTU  | 0.5  | S | I | S | 4     |
| 2012CREG668 | C. freunc NTU | 2    | R | R | R | 0.5   |
| 2012CREG669 | E. aerogεNTU  | 16   | R | R | R | 2     |
| 2012CREG670 | E. aerogεNTU  | 1    | I | R | R | 0.5   |
| 2012CREG671 | E. cloaca NTU | 2    | R | R | R | 0.25  |
| 2012CREG672 | E. coli NTU   | 4    | R | R | R | 1     |
| 2012CREG673 | E. coli NTU   | 4    | R | R | R | 0.25  |
| 2012CREG674 | E. coli NTU   | 4    | R | R | R | 0.25  |
| 2012CREG675 | K. pneunNTU   | 1    | I | R | R | 1     |
| 2012CREG676 | K. pneunNTU   | 2    | R | R | R | 0.25  |
| 2012CREG677 | K. pneunNTU   | 4    | R | R | R | 0.25  |



|             |               |      |   |   |   |      |
|-------------|---------------|------|---|---|---|------|
| 2012CREG678 | K. pneunNTU   | 2    | R | R | R | 0.25 |
| 2012CREG679 | K. pneunNTU   | 16   | R | R | R | 0.5  |
| 2012CREG680 | K. pneunNTU   | >128 | R | R | R | 32   |
| 2012CREG681 | K. pneunNTU   | 2    | R | R | R | 0.5  |
| 2012CREG682 | K. pneunNTU   | 1    | I | R | R | 0.25 |
| 2012CREG683 | E. aerog€NTU  | 1    | I | R | R | 0.5  |
| 2012CREG684 | E. cloaca NTU | 1    | I | R | R | 0.25 |
| 2012CREG685 | E. cloaca NTU | 8    | R | R | R | 0.5  |
| 2012CREG686 | E. cloaca NTU | 8    | R | R | R | 0.25 |
| 2012CREG687 | E. cloaca NTU | 8    | R | R | R | 0.25 |
| 2012CREG688 | E. coli NTU   | 1    | I | R | R | 0.25 |
| 2012CREG689 | E. coli NTU   | 128  | R | R | R | 16   |
| 2012CREG690 | E. coli NTU   | 8    | R | R | R | 1    |
| 2012CREG691 | K. pneunNTU   | 2    | R | R | R | 0.25 |
| 2012CREG692 | K. pneunNTU   | 2    | R | R | R | 0.5  |
| 2012CREG693 | K. pneunNTU   | 1    | I | R | R | 0.25 |
| 2012CREG694 | K. pneunNTU   | 2    | R | R | R | 0.5  |
| 2012CREG695 | K. pneunNTU   | 2    | R | R | R | 1    |
| 2012CREG696 | K. pneunNTU   | 2    | R | R | R | 0.25 |
| 2012CREG697 | K. pneunNTU   | 4    | R | R | R | 0.5  |
| 2012CREG698 | K. pneunNTU   | 2    | R | R | R | 0.25 |
| 2012CREG699 | E. cloaca NTU | 4    | R | R | R | 2    |
| 2012CREG700 | E. cloaca NTU | 4    | R | R | R | 0.5  |
| 2012CREG701 | E. cloaca NTU | 4    | R | R | R | 2    |
| 2012CREG702 | E. cloaca NTU | 8    | R | R | R | 0.5  |
| 2012CREG703 | E. coli NTU   | 2    | R | R | R | 1    |
| 2012CREG704 | K. pneunNTU   | 1    | I | R | R | 1    |
| 2012CREG705 | K. pneunNTU   | 8    | R | R | R | 1    |
| 2012CREG706 | K. pneunNTU   | 2    | R | R | R | 0.25 |
| 2012CREG707 | K. pneunNTU   | 4    | R | R | R | 1    |
| 2012CREG709 | K. pneunNTU   | 1    | I | R | R | 0.25 |
| 2012CREG710 | K. pneunNTU   | 2    | R | R | R | 0.5  |

| IMP_C | MEM   | MEM_C | FTX  | FTX_C | FMX  | FMX_C | FEP   | FEP_C |
|-------|-------|-------|------|-------|------|-------|-------|-------|
| I     | 0.125 | S     | >128 | R     | >128 | R     | 2     | S     |
| I     | 0.06  | S     | 16   | R     | 128  | R     | 0.25  | S     |
| R     | 1     | S     | 64   | R     | 32   | I     | 0.25  | S     |
| S     | 0.06  | S     | 32   | R     | 128  | R     | 32    | R     |
| I     | 0.06  | S     | 16   | R     | 64   | R     | 0.25  | S     |
| S     | 0.06  | S     | >128 | R     | >128 | R     | 2     | S     |
| I     | 0.25  | S     | 64   | R     | >128 | R     | 16    | I     |
| R     | 0.5   | S     | >128 | R     | >128 | R     | 32    | R     |
| I     | 0.125 | S     | 64   | R     | 128  | R     | 8     | S     |
| I     | 0.06  | S     | 32   | R     | 64   | R     | 0.5   | S     |
| I     | 0.03  | S     | 8    | R     | 64   | R     | 0.25  | S     |
| I     | 0.25  | S     | 128  | R     | >128 | R     | 8     | S     |
| S     | 0.06  | S     | 64   | R     | 128  | R     | 1     | S     |
| S     | 0.06  | S     | 64   | R     | 128  | R     | 1     | S     |
| S     | 0.06  | S     | 32   | R     | 128  | R     | 1     | S     |
| S     | 0.06  | S     | 128  | R     | >128 | R     | 2     | S     |
| I     | 0.125 | S     | 128  | R     | >128 | R     | 1     | S     |
| R     | 0.5   | S     | 128  | R     | 32   | I     | 8     | S     |
| S     | 0.06  | S     | 32   | R     | 128  | R     | 0.25  | S     |
| I     | 0.125 | S     | 4    | R     | >128 | R     | 0.125 | S     |
| I     | 0.5   | S     | >128 | R     | >128 | R     | 8     | S     |
| I     | 0.06  | S     | >128 | R     | >128 | R     | 8     | S     |
| R     | 0.25  | S     | >128 | R     | >128 | R     | 16    | I     |
| S     | 0.125 | S     | 128  | R     | >128 | R     | 2     | S     |
| S     | 0.125 | S     | 64   | R     | >128 | R     | 1     | S     |
| S     | 0.06  | S     | >128 | R     | >128 | R     | 1     | S     |
| R     | 0.125 | S     | 8    | R     | 8    | S     | 2     | S     |
| S     | 0.06  | S     | 64   | R     | >128 | R     | 0.5   | S     |
| I     | 0.125 | S     | >128 | R     | 128  | R     | 64    | R     |
| S     | 0.25  | S     | >128 | R     | >128 | R     | >128  | R     |
| S     | 0.06  | S     | >128 | R     | >128 | R     | 32    | R     |
| S     | 0.06  | S     | >128 | R     | 128  | R     | 128   | R     |
| S     | 0.06  | S     | >128 | R     | >128 | R     | 128   | R     |
| R     | 0.25  | S     | >128 | R     | >128 | R     | 2     | S     |
| I     | 0.125 | S     | >128 | R     | >128 | R     | 64    | R     |
| I     | 0.25  | S     | >128 | R     | >128 | R     | 4     | S     |
| R     | 0.25  | S     | >128 | R     | >128 | R     | 4     | S     |
| I     | 0.125 | S     | 128  | R     | >128 | R     | 4     | S     |
| S     | 0.125 | S     | 128  | R     | >128 | R     | 0.5   | S     |
| I     | 0.25  | S     | >128 | R     | >128 | R     | 8     | S     |
| R     | 0.5   | S     | >128 | R     | >128 | R     | 4     | S     |
| R     | 0.06  | S     | >128 | R     | >128 | R     | 8     | S     |
| I     | 0.03  | S     | 128  | R     | 64   | R     | 16    | I     |
| S     | 0.03  | S     | 64   | R     | >128 | R     | 16    | I     |
| R     | 0.125 | S     | >128 | R     | >128 | R     | 32    | R     |

|   |       |   |      |   |      |   |       |   |
|---|-------|---|------|---|------|---|-------|---|
| I | 0.06  | S | >128 | R | 128  | R | 64    | R |
| S | 0.06  | S | >128 | R | >128 | R | 128   | R |
| S | 0.06  | S | 128  | R | 64   | R | 0.25  | S |
| R | 0.125 | S | 64   | R | 128  | R | 1     | S |
| I | 0.125 | S | 128  | R | 64   | R | 0.25  | S |
| R | 2     | I | 8    | R | 4    | S | 32    | R |
| I | 0.03  | S | >128 | R | 128  | R | 32    | R |
| R | 0.125 | S | >128 | R | >128 | R | 64    | R |
| R | 0.06  | S | 16   | R | >128 | R | 0.125 | S |
| R | 0.06  | S | 8    | R | 32   | I | 0.125 | S |
| R | 1     | S | >128 | R | >128 | R | 8     | S |
| R | 1     | S | 8    | R | >128 | R | 8     | S |
| S | 0.06  | S | 64   | R | 128  | R | 32    | R |
| I | 0.06  | S | 64   | R | 128  | R | 32    | R |
| R | 128   | R | >128 | R | >128 | R | >128  | R |
| I | 0.125 | S | 32   | R | >128 | R | 1     | S |
| R | 8     | R | >128 | R | >128 | R | >128  | R |
| S | 0.125 | S | 64   | R | 128  | R | 0.5   | S |
| S | 0.06  | S | 32   | R | >128 | R | 1     | S |
| S | 0.06  | S | 32   | R | >128 | R | 0.25  | S |
| S | 0.125 | S | 128  | R | 128  | R | 0.5   | S |
| S | 0.125 | S | 16   | R | >128 | R | 0.125 | S |
| I | 1     | R | 32   | R | >128 | R | 1     | S |
| S | 0.125 | S | 128  | R | >128 | R | 0.5   | S |
| S | 0.5   | R | >128 | R | >128 | R | 2     | S |
| S | 0.06  | S | 32   | R | >128 | R | 0.5   | S |
| S | 0.125 | S | 32   | R | 128  | R | 4     | S |
| S | 0.06  | S | 128  | R | >128 | R | 1     | S |
| S | 0.06  | S | >128 | R | >128 | R | 2     | I |
| S | 0.06  | S | 32   | R | >128 | R | 1     | S |
| S | 0.125 | S | >128 | R | >128 | R | >128  | R |
| S | 0.06  | S | >128 | R | 8    | S | >128  | R |
| S | 0.25  | S | >128 | R | 8    | S | >128  | R |
| S | 0.5   | R | 128  | R | >128 | R | 2     | S |
| I | 1     | R | 128  | R | >128 | R | 2     | S |
| S | 0.125 | S | >128 | R | 1    | S | >128  | R |
| S | 0.125 | S | >128 | R | 64   | R | 64    | R |
| S | 0.06  | S | >128 | R | 128  | R | 64    | R |
| S | 0.125 | S | 128  | R | 64   | R | 32    | R |
| S | 0.06  | S | 128  | R | 64   | R | 16    | I |
| S | 0.125 | S | >128 | R | 128  | R | 64    | R |
| S | 2     | R | 8    | R | 64   | R | 8     | S |
| R | 32    | R | >128 | R | >128 | R | >128  | R |
| S | 0.125 | S | 16   | R | 128  | R | 16    | S |
| I | 0.25  | S | >128 | R | >128 | R | >128  | R |
| R | 4     | R | 8    | R | >128 | R | 2     | S |

|   |       |   |      |   |      |   |       |   |
|---|-------|---|------|---|------|---|-------|---|
| S | 0.06  | S | >128 | R | >128 | R | 128   | R |
| S | 0.06  | S | 8    | R | 64   | R | 0.25  | S |
| S | 0.06  | S | 8    | R | 64   | R | 0.25  | S |
| S | 0.125 | S | 128  | R | >128 | R | 2     | S |
| S | 0.125 | S | 16   | R | 128  | R | 0.25  | S |
| S | 0.125 | S | 16   | R | 128  | R | 0.125 | S |
| S | 0.06  | S | >128 | R | >128 | R | 64    | R |
| I | 0.5   | I | 0.5  | S | >128 | R | 0.06  | S |
| S | 0.125 | S | >128 | R | >128 | R | 64    | R |
| S | 0.125 | S | 128  | R | >128 | R | 2     | S |
| R | 32    | R | >128 | R | >128 | R | >128  | R |
| S | 0.06  | S | >128 | R | 128  | R | 64    | R |
| S | 0.5   | S | 32   | R | 16   | I | 32    | R |
| S | 0.06  | S | >128 | R | >128 | R | 64    | R |
| R | 2     | I | >128 | R | >128 | R | 4     | S |
| S | 0.06  | S | >128 | R | 128  | R | 32    | R |
| S | <0.03 | S | 8    | R | 128  | R | 0.5   | S |
| S | <0.03 | S | 32   | R | 32   | I | 0.5   | S |
| S | 0.25  | S | >128 | R | >128 | R | 2     | S |
| R | 8     | R | >128 | R | >128 | R | >128  | R |
| S | 0.06  | S | >128 | R | >128 | R | 64    | R |
| I | 0.06  | S | 128  | R | 128  | R | 128   | R |
| I | 0.06  | S | 128  | R | 128  | R | 32    | R |
| S | 0.06  | S | 64   | R | 128  | R | 32    | R |
| R | 1     | S | 64   | R | 128  | R | 32    | R |
| R | 2     | I | >128 | R | >128 | R | 128   | R |
| S | 0.06  | S | 8    | R | 128  | R | 32    | R |
| R | 2     | I | >128 | R | 128  | R | 128   | R |
| S | 0.125 | S | >128 | R | >128 | R | 0.5   | S |
| S | 0.25  | S | >128 | R | >128 | R | 8     | S |
| S | 0.06  | S | >128 | R | >128 | R | 4     | S |
| S | 0.06  | S | >128 | R | 64   | R | 64    | R |
| S | 0.125 | S | 64   | R | 128  | R | 0.5   | S |
| R | 4     | R | >128 | R | >128 | R | 32    | R |
| S | 0.06  | S | >128 | R | 128  | R | 128   | R |
| S | 0.25  | S | 128  | R | >128 | R | 4     | S |
| S | 0.25  | S | 128  | R | >128 | R | 1     | S |
| S | 0.06  | S | 32   | R | 64   | R | 2     | S |
| R | 4     | R | >128 | R | >128 | R | >128  | R |
| S | 0.25  | S | >128 | R | >128 | R | 8     | S |
| S | 0.25  | S | >128 | R | 2    | S | >128  | R |
| S | 0.25  | S | 32   | R | 16   | I | 1     | S |
| S | 0.06  | S | 64   | R | 128  | R | 0.5   | S |
| S | 0.5   | S | >128 | R | 8    | S | >128  | R |
| R | 8     | R | >128 | R | >128 | R | >128  | R |
| R | 0.25  | S | 128  | R | >128 | R | 0.5   | S |

|   |       |   |      |   |      |   |      |   |
|---|-------|---|------|---|------|---|------|---|
| S | 0.25  | S | 64   | R | >128 | R | 8    | S |
| S | 0.25  | S | >128 | R | >128 | R | 4    | S |
| S | 0.125 | S | >128 | R | 128  | R | >128 | R |
| S | 0.125 | S | >128 | R | 128  | R | 32   | R |
| S | 0.125 | S | >128 | R | 128  | R | >128 | R |
| S | 0.5   | S | >128 | R | >128 | R | 16   | I |
| S | 0.06  | S | 8    | R | 32   | I | 0.5  | S |
| S | 0.06  | S | 64   | R | 64   | R | 0.25 | S |
| S | 0.25  | S | >128 | R | 128  | R | 128  | R |
| S | 0.125 | S | >128 | R | 1    | S | >128 | R |
| I | 0.125 | S | 64   | R | 64   | R | 0.25 | S |
| S | 0.125 | S | 32   | R | 64   | R | 0.5  | S |
| S | 0.06  | S | >128 | R | >128 | R | 4    | S |
| S | 0.125 | S | >128 | R | 128  | R | 64   | R |
| S | 0.25  | S | >128 | R | >128 | R | 1    | S |
| S | 0.06  | S | >128 | R | 128  | R | 64   | R |
| S | 0.06  | S | >128 | R | 128  | R | 128  | R |
| S | 0.125 | S | >128 | R | 0.5  | S | >128 | R |
| R | 4     | R | 128  | R | >128 | R | 64   | R |
| S | 0.5   | S | 128  | R | 8    | S | 64   | R |
| S | 0.125 | S | >128 | R | >128 | R | 2    | S |
| R | 4     | R | 128  | R | >128 | R | 4    | S |
| S | 0.06  | S | >128 | R | 1    | S | >128 | R |
| S | 0.125 | S | 64   | R | >128 | R | 1    | S |
| S | 0.06  | S | 64   | R | 128  | R | 8    | S |
| I | 2     | I | >128 | R | >128 | R | >128 | R |
| S | 0.125 | S | >128 | R | 32   | I | >128 | R |
| S | 0.06  | S | 128  | R | 128  | R | 32   | R |
| S | 0.5   | S | >128 | R | >128 | R | 8    | S |
| S | 0.5   | S | >128 | R | >128 | R | 4    | S |
| I | 0.25  | S | 8    | R | >128 | R | 0.25 | S |
| S | 0.125 | S | 128  | R | >128 | R | 2    | S |
| S | 0.06  | S | >128 | R | 128  | R | 128  | R |
| R | 4     | R | >128 | R | >128 | R | >128 | R |
| S | 0.06  | S | >128 | R | 128  | R | 64   | R |
| S | 0.25  | S | 16   | R | >128 | R | 1    | S |
| S | 0.125 | S | >128 | R | >128 | R | 2    | S |
| S | 0.06  | S | 128  | R | 64   | R | 8    | S |
| I | 0.25  | S | 128  | R | 128  | R | 1    | S |
| S | 0.125 | S | 128  | R | >128 | R | 8    | S |
| S | 0.06  | S | 128  | R | 32   | I | 16   | I |
| S | 0.125 | S | >128 | R | >128 | R | 4    | S |
| R | 8     | R | >128 | R | >128 | R | >128 | R |
| S | 0.25  | S | >128 | R | >128 | R | 2    | S |
| S | 0.06  | S | >128 | R | 128  | R | 1    | S |
| S | 0.25  | S | >128 | R | >128 | R | >128 | R |

|   |       |   |      |   |      |   |       |   |
|---|-------|---|------|---|------|---|-------|---|
| S | 0.06  | S | >128 | R | >128 | R | 32    | R |
| S | 0.25  | S | >128 | R | >128 | R | 1     | S |
| I | 8     | R | >128 | R | >128 | R | 128   | R |
| S | 0.06  | S | 64   | R | 128  | R | 2     | S |
| S | 0.5   | S | >128 | R | >128 | R | 1     | S |
| R | 2     | I | >128 | R | >128 | R | 64    | R |
| S | 0.125 | S | 32   | R | 64   | R | 2     | S |
| S | 0.25  | S | >128 | R | >128 | R | 4     | S |
| S | 0.25  | S | 128  | R | 128  | R | 32    | R |
| S | 0.125 | S | >128 | R | >128 | R | 32    | R |
| S | 0.06  | S | 128  | R | 64   | R | 4     | S |
| I | 0.25  | S | 64   | R | >128 | R | 0.5   | S |
| S | 0.125 | S | 2    | I | >128 | R | 0.125 | S |
| S | 0.06  | S | >128 | R | >128 | R | 2     | S |
| S | 0.125 | S | >128 | R | 8    | S | >128  | R |
| S | 0.125 | S | >128 | R | >128 | R | 128   | R |
| S | 0.125 | S | 128  | R | >128 | R | 0.5   | S |
| S | 0.06  | S | >128 | R | 128  | R | 128   | R |
| I | 0.25  | S | 64   | R | 16   | I | 32    | R |
| R | 4     | R | 128  | R | >128 | R | 4     | S |
| S | 0.125 | S | 64   | R | 64   | R | 128   | R |
| S | 0.25  | S | >128 | R | >128 | R | 2     | S |
| S | 0.125 | S | >128 | R | >128 | R | 8     | S |
| S | 0.125 | S | >128 | R | >128 | R | 4     | S |
| S | 0.25  | S | >128 | R | >128 | R | 128   | R |
| S | 0.06  | S | 2    | I | 64   | R | 0.5   | S |
| S | <0.03 | S | >128 | R | 64   | R | 1     | S |
| S | 0.06  | S | >128 | R | 128  | R | 64    | R |
| I | 1     | S | >128 | R | >128 | R | >128  | R |
| S | 0.06  | S | 64   | R | >128 | R | 4     | S |
| S | 0.06  | S | 32   | R | >128 | R | 2     | S |
| I | 0.5   | S | 8    | R | >128 | R | 0.125 | S |
| S | 0.06  | S | 64   | R | >128 | R | 0.25  | S |
| S | 0.125 | S | >128 | R | 128  | R | 64    | R |
| S | 0.125 | S | >128 | R | >128 | R | >128  | R |
| I | 2     | I | 128  | R | 64   | R | 128   | R |
| S | 0.06  | S | 8    | R | 64   | R | 0.25  | S |
| S | 0.125 | S | 64   | R | 64   | R | 64    | R |
| S | 0.125 | S | 64   | R | >128 | R | 1     | S |
| S | 0.25  | S | >128 | R | >128 | R | 32    | R |
| S | 0.25  | S | >128 | R | >128 | R | 128   | R |
| S | 0.125 | S | >128 | R | >128 | R | 128   | R |
| S | 0.125 | S | >128 | R | >128 | R | 64    | R |
| S | 0.06  | S | >128 | R | 64   | R | 64    | R |
| S | 0.5   | S | 32   | R | 64   | R | 8     | S |
| S | 0.06  | S | >128 | R | >128 | R | 2     | S |

|   |       |   |      |   |      |   |       |   |
|---|-------|---|------|---|------|---|-------|---|
| S | 0.125 | S | >128 | R | 8    | S | >128  | R |
| S | 0.125 | S | 64   | R | >128 | R | 1     | S |
| S | 0.06  | S | 64   | R | >128 | R | 16    | I |
| S | 0.125 | S | >128 | R | 16   | I | >128  | R |
| S | 0.25  | S | 128  | R | >128 | R | 16    | I |
| S | 0.06  | S | 64   | R | >128 | R | 16    | I |
| R | 4     | R | 8    | R | >128 | R | 16    | I |
| S | 0.5   | S | >128 | R | >128 | R | >128  | R |
| S | 0.125 | S | 64   | R | >128 | R | 0.5   | S |
| S | 0.25  | S | 64   | R | >128 | R | 4     | S |
| S | 0.125 | S | 64   | R | >128 | R | 2     | S |
| S | 0.06  | S | 128  | R | >128 | R | 0.25  | S |
| S | 0.125 | S | 4    | R | >128 | R | 0.125 | S |
| S | 0.125 | S | 64   | R | 128  | R | 0.5   | S |
| S | 0.125 | S | 64   | R | 128  | R | 0.25  | S |
| S | 0.06  | S | 128  | R | >128 | R | 32    | R |
| R | 2     | I | 64   | R | >128 | R | 2     | S |
| S | 0.06  | S | >128 | R | >128 | R | 2     | S |
| S | 0.06  | S | >128 | R | 128  | R | 64    | R |
| S | 0.125 | S | 16   | R | 128  | R | 0.25  | S |
| I | 0.5   | S | >128 | R | >128 | R | 128   | R |
| S | 0.25  | S | 128  | R | >128 | R | 4     | S |
| I | 1     | S | >128 | R | >128 | R | >128  | R |
| S | <0.03 | S | 32   | R | 32   | I | 8     | S |
| I | 0.06  | S | >128 | R | 128  | R | 64    | R |
| S | 0.06  | S | >128 | R | 128  | R | 64    | R |
| S | 0.25  | S | >128 | R | 128  | R | 128   | R |
| S | 0.06  | S | 128  | R | 64   | R | 64    | R |
| S | 0.125 | S | >128 | R | >128 | R | 32    | R |
| S | 0.06  | S | 64   | R | 128  | R | 0.5   | S |
| I | 1     | S | 64   | R | >128 | R | 4     | S |
| I | 0.125 | S | 2    | I | 32   | I | 0.125 | S |
| S | 0.06  | S | 64   | R | 128  | R | 0.5   | S |
| S | 0.06  | S | 64   | R | >128 | R | 0.5   | S |
| R | 1     | S | 128  | R | >128 | R | 2     | S |
| R | 16    | R | 128  | R | >128 | R | 2     | S |
| S | 0.5   | S | >128 | R | >128 | R | 8     | S |
| S | 0.125 | S | 128  | R | >128 | R | 2     | S |
| I | 8     | R | >128 | R | >128 | R | 64    | R |
| S | 0.06  | S | >128 | R | >128 | R | 4     | S |
| S | 0.125 | S | >128 | R | >128 | R | 4     | S |
| S | 0.06  | S | 128  | R | 128  | R | 32    | R |
| S | 0.125 | S | 128  | R | >128 | R | 4     | S |
| R | 16    | R | 128  | R | 64   | R | 32    | R |
| S | 0.125 | S | >128 | R | 2    | S | >128  | R |
| S | 0.06  | S | 128  | R | 128  | R | 64    | R |

|   |       |   |      |   |      |   |       |   |
|---|-------|---|------|---|------|---|-------|---|
| S | 0.06  | S | 128  | R | 64   | R | 64    | R |
| S | 0.06  | S | 64   | R | 128  | R | 64    | R |
| S | 0.06  | S | 32   | R | 64   | R | 8     | S |
| S | 0.125 | S | 64   | R | >128 | R | 0.25  | S |
| S | 0.06  | S | 128  | R | 128  | R | 32    | R |
| S | 0.06  | S | 128  | R | 128  | R | 64    | R |
| S | 0.06  | S | 8    | R | 64   | R | 0.125 | S |
| S | 0.06  | S | 64   | R | 64   | R | 64    | R |
| S | 0.25  | S | >128 | R | >128 | R | 2     | S |
| S | 0.125 | S | >128 | R | >128 | R | 4     | S |
| S | 0.125 | S | 128  | R | >128 | R | 1     | S |
| S | 0.125 | S | 1    | S | 128  | R | 0.06  | S |
| I | 0.06  | S | 128  | R | 64   | R | 0.25  | S |
| S | 0.06  | S | 128  | R | 128  | R | 0.5   | S |
| S | 0.25  | S | 64   | R | >128 | R | 0.25  | S |
| S | 0.06  | S | 64   | R | 64   | R | 32    | R |
| S | 0.06  | S | 16   | R | >128 | R | 0.125 | S |
| S | 0.25  | S | >128 | R | 1    | S | >128  | R |
| S | 0.125 | S | 64   | R | 128  | R | 0.25  | S |
| S | 0.5   | S | >128 | R | >128 | R | 1     | S |
| I | 0.06  | S | 32   | R | 64   | R | 8     | S |
| S | 0.25  | S | 128  | R | >128 | R | 2     | S |
| S | 0.125 | S | 64   | R | 128  | R | 0.25  | S |
| S | 0.25  | S | >128 | R | 2    | S | 64    | R |
| I | 0.5   | S | >128 | R | >128 | R | 4     | S |
| I | 0.25  | S | 128  | R | >128 | R | 2     | S |
| S | 0.06  | S | 64   | R | >128 | R | 1     | S |
| R | 2     | I | >128 | R | >128 | R | 4     | S |
| R | 16    | R | >128 | R | >128 | R | >128  | R |
| S | 8     | R | 128  | R | >128 | R | 32    | R |
| R | 4     | R | 64   | R | >128 | R | 8     | S |
| R | 4     | R | 128  | R | >128 | R | 2     | S |
| I | 0.25  | S | >128 | R | >128 | R | >128  | R |
| S | 0.125 | S | >128 | R | 1    | S | >128  | R |
| S | 0.06  | S | 2    | I | 64   | R | 0.25  | S |
| R | 4     | R | >128 | R | >128 | R | 128   | R |
| R | 0.5   | S | 128  | R | >128 | R | 0.5   | S |
| I | 2     | I | 128  | R | 32   | I | 128   | R |
| S | 1     | S | >128 | R | 64   | R | >128  | R |
| S | 0.125 | S | 128  | R | >128 | R | 2     | S |
| S | 0.125 | S | >128 | R | >128 | R | 2     | S |
| I | 0.5   | S | >128 | R | >128 | R | 64    | R |
| S | 0.06  | S | 64   | R | 128  | R | 1     | S |
| S | 0.25  | S | 32   | R | >128 | R | 2     | S |
| S | 0.125 | S | 16   | R | >128 | R | 0.125 | S |
| S | 0.125 | S | 128  | R | >128 | R | 1     | S |



|   |       |   |       |   |      |   |       |   |
|---|-------|---|-------|---|------|---|-------|---|
| S | 0.25  | S | 16    | R | >128 | R | 0.25  | S |
| S | 0.25  | S | 128   | R | >128 | R | 2     | S |
| I | 0.25  | S | 64    | R | 128  | R | 0.25  | S |
| S | 0.125 | S | >128  | R | >128 | R | 0.5   | S |
| S | 0.06  | S | 64    | R | >128 | R | 4     | S |
| S | 0.25  | S | >128  | R | 128  | R | >128  | R |
| S | 0.125 | S | 64    | R | >128 | R | 8     | S |
| S | 0.25  | S | 128   | R | >128 | R | 0.5   | S |
| S | 0.5   | S | 64    | R | >128 | R | 32    | R |
| R | 2     | I | >128  | R | >128 | R | 128   | R |
| S | 0.125 | S | 32    | R | 128  | R | 0.125 | S |
| S | 0.125 | S | 8     | R | >128 | R | 0.5   | S |
| S | 0.5   | S | >128  | R | 128  | R | >128  | R |
| S | 0.25  | S | >128  | R | >128 | R | 128   | R |
| S | 0.06  | S | 32    | R | 128  | R | 0.125 | S |
| S | 0.06  | S | 64    | R | >128 | R | 1     | S |
| S | 0.06  | S | >128  | R | 0.25 | S | >128  | R |
| S | 0.06  | S | 8     | R | 128  | R | 1     | S |
| S | 0.06  | S | >128  | R | 128  | R | 64    | R |
| S | 0.06  | S | 0.25  | S | >128 | R | 0.125 | S |
| R | 8     | R | >128  | R | >128 | R | >128  | R |
| I | 0.06  | S | 128   | R | 64   | R | 64    | R |
| I | 0.06  | S | 16    | R | 64   | R | 64    | R |
| S | 0.25  | S | >128  | R | >128 | R | 32    | R |
| R | 4     | R | >128  | R | >128 | R | 4     | S |
| R | 0.06  | S | 0.5   | S | 2    | S | 16    | I |
| R | 8     | R | >128  | R | >128 | R | 128   | R |
| S | 0.125 | S | 128   | R | >128 | R | 16    | I |
| R | 64    | R | >128  | R | >128 | R | 32    | R |
| R | 0.125 | S | 0.06  | S | 2    | S | 0.06  | S |
| S | 0.125 | S | >128  | R | 64   | R | 128   | R |
| S | 0.06  | S | 8     | R | 64   | R | 0.125 | S |
| S | 0.125 | S | >128  | R | >128 | R | 128   | R |
| I | 0.125 | S | >128  | R | 64   | R | 64    | R |
| S | 0.125 | S | 32    | R | >128 | R | 0.5   | S |
| S | 0.06  | S | 0.125 | S | 8    | S | 0.125 | S |
| R | 0.125 | S | 1     | S | 128  | R | 0.125 | S |
| S | 0.06  | S | 32    | R | 64   | R | 2     | S |
| R | 0.25  | S | >128  | R | >128 | R | 4     | S |
| R | 0.06  | S | <0.03 | S | 8    | S | 32    | R |
| S | 0.125 | S | 32    | R | 32   | I | 0.5   | S |
| I | 0.125 | S | 128   | R | >128 | R | 16    | I |
| I | 0.06  | S | >128  | R | 64   | R | 64    | R |
| R | 64    | R | >128  | R | >128 | R | 128   | R |
| R | 64    | R | >128  | R | >128 | R | 128   | R |
| R | 64    | R | >128  | R | >128 | R | 128   | R |

|   |       |   |      |   |      |   |       |   |
|---|-------|---|------|---|------|---|-------|---|
| S | 0.06  | S | >128 | R | 64   | R | 64    | R |
| S | 0.25  | S | 128  | R | >128 | R | 8     | S |
| S | 0.06  | S | >128 | R | >128 | R | 2     | S |
| S | 0.125 | S | >128 | R | >128 | R | 2     | S |
| R | 128   | R | >128 | R | >128 | R | >128  | R |
| R | 128   | R | >128 | R | >128 | R | 128   | R |
| I | 0.25  | S | >128 | R | >128 | R | 2     | S |
| I | 0.125 | S | >128 | R | >128 | R | 128   | R |
| S | 0.125 | S | >128 | R | 128  | R | 128   | R |
| S | 0.125 | S | 64   | R | 128  | R | 0.125 | S |
| S | 0.25  | S | 128  | R | >128 | R | 2     | S |
| R | 0.125 | S | 64   | R | >128 | R | 2     | S |
| I | 0.06  | S | >128 | R | 128  | R | 128   | R |
| I | 0.5   | S | >128 | R | >128 | R | 64    | R |
| S | 0.125 | S | >128 | R | >128 | R | 0.5   | S |
| S | 0.25  | S | 128  | R | >128 | R | 0.5   | S |
| S | 0.125 | S | >128 | R | >128 | R | 64    | R |
| S | 0.06  | S | >128 | R | 64   | R | >128  | R |
| S | 0.125 | S | >128 | R | 128  | R | 64    | R |
| S | 0.125 | S | >128 | R | 64   | R | >128  | R |
| I | 2     | I | >128 | R | >128 | R | 4     | S |
| S | 0.06  | S | 4    | R | 32   | I | 0.06  | S |
| R | 1     | S | >128 | R | >128 | R | 64    | R |
| I | 0.5   | S | 16   | R | 32   | I | 0.125 | S |
| S | 0.06  | S | 4    | R | 32   | I | 0.125 | S |
| S | 0.125 | S | >128 | R | 128  | R | 32    | R |
| R | 1     | S | 128  | R | >128 | R | 1     | S |
| S | 0.5   | S | 128  | R | >128 | R | 32    | R |
| S | 0.125 | S | >128 | R | >128 | R | 16    | I |
| S | 0.5   | S | 128  | R | >128 | R | 2     | S |
| S | 0.5   | S | 64   | R | >128 | R | 16    | I |
| S | 0.125 | S | >128 | R | >128 | R | 64    | R |
| S | 0.06  | S | 64   | R | 128  | R | 0.5   | S |
| S | 0.25  | S | 128  | R | >128 | R | 2     | S |
| S | 0.125 | S | >128 | R | >128 | R | 64    | R |
| I | 0.125 | S | 16   | R | >128 | R | 0.125 | S |
| S | 0.25  | S | 128  | R | >128 | R | 2     | S |
| S | 0.06  | S | >128 | R | 128  | R | 64    | R |
| S | 0.125 | S | 64   | R | >128 | R | 1     | S |
| S | 0.125 | S | 64   | R | >128 | R | 1     | S |
| I | 0.06  | S | 128  | R | >128 | R | 32    | R |
| R | 16    | R | >128 | R | >128 | R | >128  | R |
| S | 0.25  | S | >128 | R | >128 | R | 2     | S |
| I | 0.125 | S | >128 | R | >128 | R | 64    | R |
| R | 32    | R | >128 | R | >128 | R | 16    | I |
| S | 0.125 | S | >128 | R | >128 | R | 64    | R |

|   |       |   |      |   |      |   |      |   |
|---|-------|---|------|---|------|---|------|---|
| S | 0.06  | S | 32   | R | 128  | R | 0.5  | S |
| S | 0.06  | S | >128 | R | 64   | R | 64   | R |
| I | 0.125 | S | 128  | R | 16   | I | 32   | R |
| S | 0.06  | S | 4    | R | 32   | I | 0.5  | S |
| S | 0.06  | S | 64   | R | 128  | R | 1    | S |
| S | 0.125 | S | 128  | R | >128 | R | 1    | S |
| R | 4     | R | >128 | R | >128 | R | 4    | S |
| I | 0.25  | S | >128 | R | >128 | R | 64   | R |
| I | 0.25  | S | >128 | R | >128 | R | 2    | S |
| R | 2     | I | >128 | R | 128  | R | 16   | I |
| S | 0.06  | S | >128 | R | 128  | R | 64   | R |
| S | 0.125 | S | 128  | R | >128 | R | 16   | I |
| S | 0.125 | S | >128 | R | 128  | R | 64   | R |
| I | 0.5   | S | >128 | R | 128  | R | 128  | R |
| I | 0.25  | S | 128  | R | 128  | R | 32   | R |
| I | 0.5   | S | >128 | R | >128 | R | 128  | R |
| S | 0.125 | S | >128 | R | >128 | R | 128  | R |
| S | 0.06  | S | >128 | R | >128 | R | 64   | R |
| S | 0.06  | S | 128  | R | >128 | R | 2    | S |
| S | 0.125 | S | 8    | R | 128  | R | 0.25 | S |
| I | 0.125 | S | >128 | R | >128 | R | 2    | S |
| S | 0.5   | S | 64   | R | >128 | R | 2    | S |
| S | 0.125 | S | 128  | R | 128  | R | 32   | R |
| S | 0.125 | S | >128 | R | 128  | R | 32   | R |
| R | 2     | I | >128 | R | >128 | R | 1    | S |
| S | 0.125 | S | 128  | R | 128  | R | 0.5  | S |
| I | 0.125 | S | >128 | R | 128  | R | 128  | R |
| S | 0.125 | S | 128  | R | 128  | R | 64   | R |
| S | 0.125 | S | >128 | R | >128 | R | 32   | R |
| I | 0.125 | S | 128  | R | 128  | R | 32   | R |
| S | 0.125 | S | >128 | R | >128 | R | 32   | R |
| S | 0.06  | S | 64   | R | 64   | R | 32   | R |
| R | 4     | R | >128 | R | >128 | R | >128 | R |
| S | 0.06  | S | 128  | R | >128 | R | 4    | S |
| S | 0.125 | S | >128 | R | >128 | R | 2    | S |
| S | 0.125 | S | >128 | R | 128  | R | 64   | R |
| S | 0.125 | S | >128 | R | 128  | R | 32   | R |
| S | 0.125 | S | >128 | R | >128 | R | 0.5  | S |
| S | 0.25  | S | >128 | R | 2    | S | 128  | R |
| I | 0.5   | S | >128 | R | 64   | R | 128  | R |
| S | 0.125 | S | >128 | R | >128 | R | 8    | S |
| I | 0.06  | S | 128  | R | 128  | R | 32   | R |
| S | 0.06  | S | 16   | R | 128  | R | 0.25 | S |
| I | 1     | S | >128 | R | 8    | S | >128 | R |
| I | 0.5   | S | 8    | R | >128 | R | 0.5  | S |
| S | 0.06  | S | 4    | R | 32   | I | 1    | S |

|   |       |   |      |   |      |   |       |   |
|---|-------|---|------|---|------|---|-------|---|
| S | 0.06  | S | >128 | R | 128  | R | 64    | R |
| S | 0.125 | S | 32   | R | 128  | R | 1     | S |
| S | 0.25  | S | >128 | R | 128  | R | 32    | R |
| S | 0.25  | S | 128  | R | 128  | R | 128   | R |
| I | 0.25  | S | 128  | R | >128 | R | 16    | I |
| S | 0.06  | S | 64   | R | >128 | R | 1     | S |
| R | 0.5   | S | >128 | R | >128 | R | 4     | S |
| S | 0.06  | S | 128  | R | 128  | R | 32    | R |
| S | 0.125 | S | >128 | R | 0.5  | S | >128  | R |
| I | 0.25  | S | 1    | S | >128 | R | 64    | R |
| S | 0.5   | S | >128 | R | >128 | R | 8     | S |
| S | 0.06  | S | 128  | R | 128  | R | 32    | R |
| R | 128   | R | 128  | R | >128 | R | 64    | R |
| S | 0.125 | S | >128 | R | 128  | R | >128  | R |
| S | 0.06  | S | 4    | R | >128 | R | 0.125 | S |
| S | 0.125 | S | 32   | R | 128  | R | 1     | S |
| S | 0.06  | S | >128 | R | >128 | R | 4     | S |
| I | 0.5   | S | >128 | R | >128 | R | >128  | R |
| S | 0.125 | S | 32   | R | >128 | R | 8     | S |
| R | 4     | R | >128 | R | >128 | R | >128  | R |
| S | 0.125 | S | 16   | R | 128  | R | 16    | S |
| R | 0.25  | S | >128 | R | >128 | R | 128   | R |
| S | 0.125 | S | 64   | R | >128 | R | 8     | S |
| I | 0.25  | S | 2    | I | 32   | I | 0.06  | S |
| R | 1     | S | 32   | R | 16   | I | 8     | S |
| R | 0.25  | S | 16   | R | >128 | R | 0.5   | S |
| S | 0.125 | S | >128 | R | >128 | R | 1     | S |
| R | 0.125 | S | 64   | R | 64   | R | 16    | I |
| S | 0.06  | S | 128  | R | 128  | R | 64    | R |
| I | 0.125 | S | >128 | R | >128 | R | 1     | S |
| S | 0.06  | S | >128 | R | 64   | R | >128  | R |
| R | 64    | R | >128 | R | >128 | R | 128   | R |
| I | 0.125 | S | 128  | R | 128  | R | 2     | S |
| S | 0.06  | S | >128 | R | 128  | R | 64    | R |
| R | 0.125 | S | 128  | R | 128  | R | 64    | R |
| S | 0.25  | S | >128 | R | 4    | S | >128  | R |
| S | 0.125 | S | 0.5  | S | 128  | R | 0.06  | S |
| I | 4     | R | >128 | R | 16   | I | >128  | R |
| S | 0.5   | S | >128 | R | >128 | R | 8     | S |
| S | 0.06  | S | 128  | R | 64   | R | 0.5   | S |
| S | 0.125 | S | >128 | R | 1    | S | >128  | R |
| S | 0.25  | S | 128  | R | >128 | R | 4     | S |
| S | 0.125 | S | 128  | R | >128 | R | 128   | R |
| I | 0.25  | S | 128  | R | >128 | R | 16    | I |
| R | 2     | I | 32   | R | >128 | R | 1     | S |
| S | 0.06  | S | >128 | R | 128  | R | 32    | R |

|   |       |   |      |   |      |   |       |   |
|---|-------|---|------|---|------|---|-------|---|
| S | 0.125 | S | >128 | R | >128 | R | 8     | S |
| S | 0.125 | S | >128 | R | >128 | R | 32    | R |
| S | 0.125 | S | >128 | R | >128 | R | 1     | S |
| I | 0.06  | S | 128  | R | 128  | R | 64    | R |
| S | 0.125 | S | >128 | R | 128  | R | 64    | R |
| S | 0.125 | S | 128  | R | >128 | R | 4     | S |
| S | 0.25  | S | 128  | R | >128 | R | 2     | S |
| S | 0.06  | S | 16   | R | >128 | R | 0.25  | S |
| S | 0.25  | S | 64   | R | 128  | R | 2     | S |
| S | 0.125 | S | 8    | R | >128 | R | 2     | S |
| R | 2     | I | >128 | R | >128 | R | >128  | R |
| R | 1     | S | >128 | R | >128 | R | 8     | S |
| S | 0.125 | S | 128  | R | >128 | R | 2     | S |
| I | 0.25  | S | >128 | R | 128  | R | 64    | S |
| I | 0.125 | S | 4    | R | 128  | R | 0.125 | S |
| S | 0.25  | S | >128 | R | 1    | S | >128  | R |
| R | 4     | R | >128 | R | >128 | R | >128  | R |
| R | 0.25  | S | 128  | R | 64   | R | 32    | R |
| S | 0.06  | S | >128 | R | >128 | R | 8     | S |
| S | 0.125 | S | >128 | R | >128 | R | 4     | S |
| I | 0.06  | S | 128  | R | >128 | R | 16    | I |
| R | 0.06  | S | >128 | R | >128 | R | 4     | S |
| R | 0.25  | S | >128 | R | >128 | R | >128  | R |
| R | 0.25  | S | >128 | R | >128 | R | 64    | R |
| S | 0.125 | S | 128  | R | >128 | R | 8     | S |
| S | <0.03 | S | 2    | I | 32   | I | 0.25  | S |
| I | 0.06  | S | 2    | I | 32   | I | 4     | S |
| S | 0.125 | S | 128  | R | 128  | R | 16    | I |
| S | 0.125 | S | >128 | R | 64   | R | 64    | R |
| S | 0.125 | S | 128  | R | 128  | R | 32    | R |
| S | 0.125 | S | >128 | R | >128 | R | 64    | R |
| S | 0.125 | S | 128  | R | 128  | R | 32    | R |
| S | 0.25  | S | >128 | R | >128 | R | >128  | R |
| S | 0.125 | S | 128  | R | >128 | R | 64    | R |
| S | 0.06  | S | >128 | R | 128  | R | 64    | R |
| R | 4     | R | 16   | R | >128 | R | 0.25  | S |
| S | 0.06  | S | 64   | R | >128 | R | 1     | S |
| S | 0.125 | S | >128 | R | >128 | R | 16    | I |
| R | 0.5   | S | 128  | R | >128 | R | 2     | S |
| S | 0.06  | S | 8    | R | >128 | R | 1     | S |
| S | 0.06  | S | 128  | R | 128  | R | 64    | R |
| S | 0.125 | S | >128 | R | 64   | R | 32    | R |
| S | 0.125 | S | 32   | R | 128  | R | 1     | S |
| S | 0.25  | S | >128 | R | 2    | S | 128   | R |
| S | 0.06  | S | 32   | R | >128 | R | 4     | S |
| S | 0.125 | S | 32   | R | >128 | R | 2     | S |

|   |       |   |      |   |      |   |      |   |
|---|-------|---|------|---|------|---|------|---|
| R | 8     | R | >128 | R | >128 | R | >128 | R |
| S | 0.5   | S | >128 | R | >128 | R | 32   | R |
| S | 0.06  | S | 128  | R | 128  | R | 64   | R |
| I | 0.25  | S | 32   | R | 128  | R | 0.25 | S |
| R | 0.125 | S | 128  | R | 64   | R | 0.25 | S |
| S | 0.125 | S | >128 | R | 128  | R | 64   | R |
| R | 4     | R | >128 | R | >128 | R | 128  | R |
| R | 8     | R | >128 | R | 32   | I | >128 | R |
| I | 0.25  | S | 16   | R | 8    | S | 4    | S |
| S | 0.125 | S | 8    | R | >128 | R | 1    | S |
| R | 0.5   | S | >128 | R | >128 | R | 128  | R |
| S | 0.25  | S | >128 | R | >128 | R | 8    | S |
| R | 4     | R | >128 | R | >128 | R | 2    | S |
| S | 0.125 | S | 32   | R | 128  | R | 1    | S |
| R | 4     | R | >128 | R | >128 | R | 8    | S |
| S | 0.5   | S | 32   | R | >128 | R | 0.5  | S |
| I | 0.5   | S | >128 | R | >128 | R | 128  | R |
| I | 1     | S | >128 | R | >128 | R | >128 | R |
| S | 0.5   | S | >128 | R | >128 | R | 128  | R |
| S | 0.125 | S | 16   | R | 128  | R | 0.25 | S |
| I | 0.125 | S | 128  | R | 128  | R | 128  | R |
| S | <0.03 | S | 8    | R | 32   | I | 2    | S |
| S | 0.125 | S | 64   | R | >128 | R | 1    | S |
| R | 4     | R | 64   | R | >128 | R | 2    | S |
| R | 2     | I | >128 | R | >128 | R | 4    | S |
| S | 0.25  | S | 64   | R | 128  | R | 0.5  | S |
| S | 0.06  | S | >128 | R | >128 | R | 2    | S |
| S | 0.125 | S | >128 | R | >128 | R | 4    | S |
| R | 2     | I | >128 | R | >128 | R | 128  | R |
| S | 0.125 | S | 8    | R | 64   | R | 1    | S |
| S | 0.06  | S | 128  | R | 64   | R | 64   | R |
| S | 0.125 | S | >128 | R | 64   | R | 128  | R |
| S | 0.25  | S | 2    | I | 128  | R | 1    | S |
| I | 0.25  | S | 64   | R | >128 | R | 1    | S |
| S | 0.06  | S | 128  | R | 32   | I | 64   | R |
| R | 64    | R | >128 | R | >128 | R | 32   | R |
| S | 0.125 | S | 32   | R | 128  | R | 1    | S |
| S | 0.125 | S | 128  | R | >128 | R | 1    | S |
| S | 0.25  | S | >128 | R | >128 | R | 32   | R |
| S | 0.125 | S | 64   | R | 128  | R | 1    | S |
| S | 0.06  | S | 128  | R | >128 | R | 0.25 | S |
| S | 0.5   | S | 128  | R | >128 | R | 2    | S |
| S | 0.125 | S | 128  | R | >128 | R | 4    | S |
| S | 0.125 | S | 2    | I | >128 | R | 0.06 | S |
| S | 0.125 | S | 128  | R | >128 | R | 2    | S |
| S | 0.125 | S | 128  | R | >128 | R | 0.5  | S |

|   |       |   |      |   |      |   |       |   |
|---|-------|---|------|---|------|---|-------|---|
| S | 0.25  | S | 16   | R | 128  | R | 0.5   | S |
| S | 0.06  | S | >128 | R | >128 | R | 32    | R |
| S | 0.125 | S | 4    | R | 128  | R | 0.06  | S |
| S | 0.06  | S | >128 | R | 128  | R | 64    | R |
| S | 0.125 | S | >128 | R | 2    | S | 64    | R |
| S | 0.125 | S | 128  | R | 128  | R | 32    | R |
| S | 0.25  | S | 128  | R | >128 | R | 2     | S |
| S | 0.25  | S | 32   | R | 128  | R | 0.5   | S |
| S | 0.06  | S | 8    | R | 128  | R | 1     | S |
| S | 0.5   | S | >128 | R | >128 | R | 128   | R |
| R | 2     | I | 128  | R | >128 | R | 8     | S |
| S | 0.06  | S | 32   | R | >128 | R | 0.5   | S |
| S | 0.25  | S | 32   | R | 128  | R | 1     | S |
| S | 0.125 | S | 32   | R | 128  | R | 0.25  | S |
| S | 1     | S | >128 | R | >128 | R | 16    | I |
| S | 0.25  | S | >128 | R | >128 | R | 4     | S |
| S | 0.125 | S | >128 | R | >128 | R | 8     | S |
| S | 0.125 | S | >128 | R | >128 | R | 4     | S |
| S | 0.125 | S | >128 | R | >128 | R | 2     | S |
| S | 0.125 | S | 128  | R | >128 | R | 4     | S |
| S | 0.125 | S | >128 | R | 32   | I | 32    | R |
| S | 0.5   | S | >128 | R | 8    | S | >128  | R |
| S | 0.25  | S | >128 | R | 16   | I | 64    | R |
| S | 0.06  | S | 128  | R | 64   | R | 32    | R |
| S | 0.06  | S | 128  | R | 128  | R | 64    | R |
| R | 16    | R | >128 | R | >128 | R | >128  | R |
| I | 0.25  | S | 16   | R | >128 | R | 0.25  | S |
| S | 0.25  | S | 16   | R | 128  | R | 0.125 | S |
| S | 0.06  | S | 8    | R | 64   | R | 0.5   | S |
| S | 0.125 | S | >128 | R | 128  | R | 64    | R |
| S | 0.06  | S | 8    | R | 128  | R | 0.25  | S |
| R | 4     | R | >128 | R | >128 | R | >128  | R |
| S | 0.06  | S | 64   | R | 64   | R | 0.5   | S |
| R | 4     | R | >128 | R | >128 | R | 8     | S |
| S | 0.125 | S | 128  | R | >128 | R | 1     | S |
| S | 0.125 | S | 64   | R | >128 | R | 0.5   | S |
| S | 0.25  | S | 128  | R | >128 | R | 4     | S |
| S | 0.125 | S | >128 | R | 128  | R | >128  | R |
| S | <0.03 | S | 32   | R | 64   | R | 0.125 | S |
| R | 32    | R | >128 | R | >128 | R | 32    | R |
| S | 0.06  | S | 128  | R | 128  | R | 64    | R |
| S | 0.125 | S | 32   | R | 128  | R | 16    | I |
| S | 0.25  | S | >128 | R | >128 | R | >128  | R |
| S | 0.25  | S | >128 | R | >128 | R | >128  | R |
| S | 0.06  | S | >128 | R | 128  | R | 64    | R |
| S | 0.125 | S | >128 | R | 32   | I | 2     | S |

|   |       |   |      |   |      |   |       |   |
|---|-------|---|------|---|------|---|-------|---|
| S | 0.06  | S | >128 | R | 128  | R | 64    | R |
| R | 32    | R | >128 | R | >128 | R | 32    | R |
| R | 0.5   | S | 128  | R | >128 | R | 0.5   | S |
| I | 0.125 | S | >128 | R | >128 | R | 4     | S |
| I | 8     | R | >128 | R | 128  | R | 32    | R |
| S | 0.125 | S | 128  | R | >128 | R | 1     | S |
| S | 0.06  | S | 8    | R | >128 | R | 0.5   | S |
| S | 0.125 | S | 64   | R | 128  | R | 0.5   | S |
| S | 0.125 | S | 64   | R | 128  | R | 0.5   | S |
| S | 0.25  | S | 64   | R | 128  | R | 2     | S |
| S | 0.125 | S | 64   | R | 128  | R | 0.5   | S |
| I | 0.5   | S | >128 | R | >128 | R | 1     | S |
| S | 0.125 | S | >128 | R | >128 | R | 2     | S |
| S | 0.125 | S | 0.5  | S | 128  | R | 0.25  | S |
| I | 1     | S | >128 | R | >128 | R | 16    | I |
| S | 0.06  | S | 32   | R | >128 | R | 1     | S |
| S | 0.5   | S | >128 | R | 4    | S | >128  | R |
| S | 0.125 | S | >128 | R | 64   | R | 128   | R |
| S | 0.06  | S | 32   | R | 64   | R | 16    | I |
| S | 0.06  | S | 128  | R | 64   | R | 64    | R |
| S | 0.125 | S | >128 | R | 64   | R | 64    | R |
| S | 0.5   | S | >128 | R | >128 | R | 64    | R |
| R | 4     | R | >128 | R | >128 | R | >128  | R |
| S | 0.06  | S | >128 | R | 128  | R | 64    | R |
| I | 0.125 | S | 8    | R | >128 | R | 0.5   | S |
| S | <0.03 | S | 4    | R | 64   | R | 0.5   | S |
| S | <0.03 | S | 4    | R | 64   | R | 0.06  | S |
| S | 0.06  | S | >128 | R | 64   | R | 64    | R |
| R | 2     | I | 128  | R | 64   | R | 64    | R |
| S | 0.06  | S | >128 | R | 128  | R | 1     | S |
| S | 0.125 | S | 32   | R | 128  | R | 0.25  | S |
| S | 0.125 | S | 64   | R | >128 | R | 2     | S |
| S | 0.06  | S | 8    | R | 128  | R | 0.25  | S |
| S | 0.06  | S | 4    | R | 128  | R | 0.06  | S |
| S | 0.25  | S | >128 | R | >128 | R | 4     | S |
| S | 1     | S | >128 | R | >128 | R | 0.06  | S |
| S | 0.06  | S | >128 | R | 1    | S | 128   | R |
| S | 0.06  | S | >128 | R | 128  | R | 128   | R |
| S | 0.125 | S | 32   | R | 128  | R | 0.25  | S |
| S | 0.25  | S | 64   | R | >128 | R | 16    | I |
| S | 0.06  | S | 32   | R | >128 | R | 0.25  | S |
| S | <0.03 | S | 4    | R | 64   | R | 0.25  | S |
| S | <0.03 | S | 4    | R | 64   | R | 0.5   | S |
| S | 0.125 | S | 64   | R | >128 | R | 1     | S |
| R | 4     | R | >128 | R | >128 | R | >128  | R |
| S | 0.06  | S | 64   | R | >128 | R | 0.125 | S |



|   |       |   |      |   |      |   |       |   |
|---|-------|---|------|---|------|---|-------|---|
| S | 0.125 | S | 64   | R | >128 | R | 0.5   | S |
| S | 0.125 | S | 16   | R | >128 | R | 0.125 | S |
| I | 0.25  | S | 64   | R | >128 | R | 0.25  | S |
| S | 0.06  | S | 32   | R | >128 | R | 0.125 | S |
| S | 0.06  | S | 4    | R | 128  | R | 0.06  | S |
| S | 0.125 | S | 64   | R | >128 | R | 1     | S |
| R | 4     | R | >128 | R | >128 | R | >128  | R |
| I | 0.5   | S | 16   | R | >128 | R | 0.125 | S |
| R | 0.5   | S | 128  | R | >128 | R | 1     | S |
| S | 0.06  | S | >128 | R | 128  | R | 64    | R |
| S | 0.125 | S | >128 | R | 128  | R | 64    | R |
| S | 0.06  | S | >128 | R | >128 | R | 64    | R |
| S | 0.125 | S | >128 | R | 128  | R | 128   | R |
| S | 0.06  | S | 16   | R | 128  | R | 0.125 | S |
| S | 0.25  | S | 16   | R | 32   | I | 4     | S |
| S | 0.25  | S | >128 | R | 1    | S | >128  | R |
| S | 0.06  | S | 64   | R | 128  | R | 0.5   | S |
| S | 0.25  | S | 32   | R | 128  | R | 8     | S |
| I | 1     | S | >128 | R | >128 | R | 128   | R |
| S | 0.25  | S | 64   | R | 64   | R | 8     | S |
| I | 1     | S | >128 | R | >128 | R | >128  | R |
| R | 4     | R | 128  | R | >128 | R | 64    | R |
| S | 0.25  | S | 128  | R | >128 | R | 0.5   | S |
| S | 0.06  | S | 32   | R | 128  | R | 0.5   | S |
| I | 0.125 | S | 64   | R | 64   | R | 0.5   | S |
| S | 0.125 | S | >128 | R | 128  | R | 128   | R |
| S | 0.25  | S | >128 | R | 16   | I | >128  | R |
| S | 0.06  | S | 128  | R | >128 | R | 1     | S |
| S | 0.06  | S | 64   | R | 32   | I | 8     | S |
| S | 0.06  | S | 128  | R | 128  | R | 32    | R |
| R | 2     | I | >128 | R | >128 | R | >128  | R |
| S | 0.125 | S | 128  | R | >128 | R | 2     | S |
| S | 0.125 | S | >128 | R | >128 | R | 128   | R |
| S | 0.06  | S | >128 | R | 128  | R | 32    | R |
| S | 0.06  | S | >128 | R | 128  | R | 64    | R |
| I | 0.125 | S | 128  | R | >128 | R | 64    | R |
| S | 0.125 | S | 128  | R | >128 | R | 1     | S |
| S | 0.06  | S | >128 | R | >128 | R | >128  | R |
| S | 0.06  | S | >128 | R | 128  | R | 64    | R |
| S | 0.125 | S | >128 | R | 128  | R | 32    | R |
| S | 0.06  | S | 32   | R | 128  | R | 1     | S |
| S | 0.06  | S | >128 | R | >128 | R | 64    | R |
| S | 0.125 | S | 128  | R | >128 | R | 2     | S |
| S | 0.06  | S | >128 | R | 128  | R | 1     | S |
| R | 16    | R | 128  | R | >128 | R | 64    | R |
| S | 0.06  | S | 128  | R | >128 | R | 8     | S |

|   |       |   |      |   |      |   |       |   |
|---|-------|---|------|---|------|---|-------|---|
| I | 0.25  | S | 8    | R | >128 | R | 0.5   | S |
| S | 0.125 | S | 128  | R | 128  | R | 32    | R |
| S | 0.25  | S | >128 | R | >128 | R | 64    | R |
| S | 0.06  | S | >128 | R | >128 | R | 4     | S |
| I | 1     | S | >128 | R | >128 | R | 32    | R |
| R | 8     | R | >128 | R | >128 | R | 16    | I |
| R | 2     | I | 128  | R | >128 | R | 32    | R |
| S | 0.06  | S | 64   | R | >128 | R | 1     | S |
| S | 0.06  | S | 4    | R | 32   | I | 4     | S |
| S | 0.06  | S | 128  | R | 128  | R | 32    | R |
| S | 0.06  | S | 128  | R | 128  | R | 32    | R |
| S | 0.06  | S | 4    | R | 64   | R | 0.06  | S |
| S | 0.06  | S | 16   | R | 64   | R | 2     | S |
| S | 0.125 | S | >128 | R | 128  | R | 64    | R |
| S | 0.06  | S | 128  | R | 128  | R | 64    | R |
| S | 0.06  | S | 128  | R | 128  | R | 32    | R |
| S | 0.06  | S | 64   | R | 64   | R | 16    | I |
| S | 0.06  | S | 16   | R | 64   | R | 0.125 | S |
| S | 0.06  | S | 32   | R | 32   | I | 4     | S |
| S | <0.03 | S | 16   | R | 64   | R | 2     | S |
| S | 0.06  | S | >128 | R | 128  | R | 16    | I |
| S | <0.03 | S | 8    | R | 128  | R | 1     | S |
| S | 0.06  | S | 128  | R | >128 | R | 32    | R |
| S | 0.125 | S | 64   | R | >128 | R | 16    | I |
| S | 0.06  | S | 8    | R | 128  | R | 0.125 | S |
| S | 0.125 | S | >128 | R | 128  | R | 128   | R |
| S | 0.06  | S | 2    | I | 64   | R | 0.125 | S |
| S | 0.06  | S | 64   | R | 64   | R | 4     | S |
| S | 0.06  | S | 32   | R | 128  | R | 0.25  | S |
| S | 0.06  | S | >128 | R | 128  | R | 64    | R |
| S | 0.125 | S | >128 | R | >128 | R | 16    | I |
| S | 0.06  | S | 64   | R | 128  | R | 16    | I |
| S | 0.06  | S | 32   | R | 128  | R | 4     | S |
| R | 0.25  | S | 128  | R | >128 | R | 0.5   | S |
| S | 0.06  | S | >128 | R | 128  | R | 32    | R |
| S | 0.06  | S | >128 | R | >128 | R | 64    | R |
| I | 0.125 | S | >128 | R | >128 | R | 1     | S |
| S | 0.06  | S | 4    | R | 32   | I | 0.25  | S |
| S | 0.06  | S | 4    | R | 64   | R | 2     | S |
| R | 8     | R | >128 | R | >128 | R | >128  | R |
| I | 0.125 | S | >128 | R | 128  | R | 128   | R |
| S | 0.06  | S | 4    | R | 64   | R | 0.25  | S |
| S | 0.06  | S | 128  | R | >128 | R | 32    | R |
| S | 0.125 | S | >128 | R | >128 | R | >128  | R |
| S | 0.06  | S | 4    | R | 64   | R | 0.125 | S |
| S | 0.125 | S | 128  | R | >128 | R | 8     | S |

|   |       |   |      |   |      |   |       |   |
|---|-------|---|------|---|------|---|-------|---|
| S | 0.06  | S | >128 | R | 128  | R | 64    | R |
| S | 0.125 | S | >128 | R | 128  | R | 32    | R |
| S | 0.06  | S | >128 | R | >128 | R | 8     | S |
| S | 0.125 | S | >128 | R | >128 | R | 64    | R |
| S | 0.06  | S | 64   | R | 64   | R | 16    | I |
| S | 0.06  | S | 128  | R | 128  | R | 64    | R |
| S | 0.125 | S | >128 | R | 128  | R | 32    | R |
| S | 0.06  | S | >128 | R | 128  | R | 64    | R |
| S | 0.06  | S | >128 | R | 64   | R | 128   | R |
| S | 0.06  | S | 64   | R | 32   | I | 16    | I |
| S | 0.5   | S | 128  | R | 128  | R | 32    | R |
| I | 0.5   | S | 128  | R | 128  | R | 32    | R |
| S | 0.06  | S | 64   | R | 128  | R | 8     | S |
| S | 0.125 | S | >128 | R | >128 | R | 1     | S |
| S | 0.125 | S | 128  | R | >128 | R | 8     | S |
| R | 2     | I | >128 | R | >128 | R | >128  | R |
| S | 0.25  | S | 128  | R | >128 | R | 2     | S |
| S | 0.06  | S | 128  | R | 128  | R | 64    | R |
| S | 0.125 | S | 128  | R | >128 | R | 64    | R |
| R | 1     | S | 128  | R | >128 | R | 32    | R |
| S | 0.125 | S | 128  | R | >128 | R | 8     | S |
| S | 0.5   | S | 128  | R | >128 | R | 16    | I |
| S | 0.06  | S | 128  | R | 128  | R | 64    | R |
| S | 0.125 | S | >128 | R | 128  | R | 64    | R |
| S | 0.06  | S | 128  | R | >128 | R | 8     | S |
| R | 2     | I | 128  | R | >128 | R | 8     | S |
| I | 0.125 | S | 8    | R | >128 | R | 0.125 | S |
| S | 0.125 | S | 64   | R | 128  | R | 0.25  | S |
| S | 0.125 | S | >128 | R | >128 | R | 4     | S |
| S | 0.125 | S | >128 | R | >128 | R | 64    | R |
| S | 0.06  | S | 128  | R | 64   | R | 16    | I |
| S | 0.125 | S | 32   | R | 64   | R | 16    | I |
| S | 0.25  | S | >128 | R | >128 | R | >128  | R |
| S | 0.06  | S | 128  | R | 128  | R | 64    | R |
| S | 0.125 | S | 8    | R | 32   | I | 16    | I |
| S | 0.06  | S | 128  | R | 64   | R | 32    | R |
| S | 0.25  | S | >128 | R | >128 | R | 128   | R |
| S | 0.125 | S | 128  | R | 128  | R | 1     | S |
| R | >128  | R | >128 | R | >128 | R | 128   | R |
| S | 0.5   | S | 128  | R | >128 | R | 16    | I |
| I | 0.125 | S | 16   | R | 128  | R | 16    | I |
| S | 0.06  | S | 16   | R | 64   | R | 0.25  | S |
| S | 0.06  | S | >128 | R | 128  | R | 64    | R |
| I | 1     | S | 64   | R | 128  | R | 2     | S |
| S | 0.06  | S | 64   | R | 128  | R | 2     | S |
| S | 0.06  | S | 128  | R | >128 | R | 16    | I |

|   |       |   |      |   |      |   |       |   |
|---|-------|---|------|---|------|---|-------|---|
| S | 0.125 | S | 64   | R | >128 | R | 0.25  | S |
| S | 0.06  | S | 128  | R | >128 | R | 1     | S |
| S | 0.125 | S | >128 | R | >128 | R | 64    | R |
| S | 0.06  | S | 32   | R | 128  | R | 0.5   | S |
| R | 64    | R | >128 | R | >128 | R | 128   | R |
| S | <0.03 | S | 32   | R | 64   | R | 16    | I |
| I | 0.25  | S | >128 | R | >128 | R | 16    | I |
| S | 0.125 | S | 128  | R | 64   | R | 0.5   | S |
| S | 0.125 | S | 32   | R | 128  | R | 0.5   | S |
| R | 8     | R | >128 | R | >128 | R | 8     | S |
| I | 0.25  | S | 16   | R | >128 | R | 0.125 | S |
| S | 0.06  | S | >128 | R | >128 | R | 2     | S |
| R | 1     | S | >128 | R | >128 | R | 4     | S |
| S | 0.125 | S | 32   | R | 128  | R | 0.5   | S |
| S | 0.06  | S | 64   | R | >128 | R | 1     | S |
| S | 0.5   | S | >128 | R | >128 | R | 4     | S |
| S | <0.03 | S | 32   | R | 128  | R | 1     | S |
| S | 0.125 | S | 128  | R | >128 | R | 2     | S |
| S | 0.125 | S | >128 | R | >128 | R | 128   | R |
| S | 0.125 | S | >128 | R | 128  | R | 64    | R |
| S | 0.125 | S | >128 | R | 128  | R | 1     | S |
| S | 0.25  | S | 64   | R | 128  | R | 2     | S |
| S | 0.5   | S | 8    | R | 64   | R | 0.5   | S |
| S | 0.25  | S | 128  | R | 128  | R | 128   | R |
| S | 0.5   | S | 128  | R | 64   | R | 16    | I |
| S | 0.25  | S | 64   | R | 128  | R | 4     | S |
| R | 4     | R | 128  | R | >128 | R | 16    | S |
| S | 4     | R | >128 | R | >128 | R | 128   | R |
| S | 0.125 | S | >128 | R | 128  | R | >128  | R |
| R | 0.5   | S | 128  | R | >128 | R | 1     | S |
| S | 0.25  | S | 0.5  | S | 16   | I | 8     | S |
| S | 0.5   | S | >128 | R | >128 | R | 1     | S |
| S | 0.06  | S | 64   | R | 128  | R | 0.5   | S |
| S | 0.125 | S | 1    | S | 64   | R | <0.03 | S |
| S | 0.06  | S | 128  | R | >128 | R | 2     | S |
| S | 0.125 | S | >128 | R | >128 | R | 8     | S |
| S | 0.06  | S | 8    | R | 32   | I | 0.5   | S |
| R | 8     | R | >128 | R | >128 | R | >128  | R |
| R | 0.5   | S | 32   | R | 64   | R | 0.5   | S |
| S | 0.125 | S | >128 | R | 128  | R | 64    | R |
| S | 0.25  | S | >128 | R | >128 | R | 1     | S |
| I | 0.125 | S | 16   | R | 64   | R | 0.5   | S |
| S | 0.06  | S | 64   | R | 32   | I | 0.25  | S |
| S | 0.5   | S | 128  | R | >128 | R | 2     | S |
| I | 0.5   | S | >128 | R | 16   | I | 8     | S |
| S | 0.125 | S | 64   | R | >128 | R | 0.25  | S |

|   |       |   |      |   |      |   |       |   |
|---|-------|---|------|---|------|---|-------|---|
| S | 0.25  | S | 128  | R | 2    | S | 16    | I |
| S | 0.125 | S | >128 | R | >128 | R | 2     | S |
| S | 0.125 | S | >128 | R | >128 | R | 16    | I |
| I | 0.25  | S | 128  | R | >128 | R | 32    | R |
| S | 0.125 | S | 8    | R | >128 | R | 0.125 | S |
| S | 0.5   | S | >128 | R | >128 | R | >128  | R |
| S | 0.5   | S | >128 | R | >128 | R | 32    | R |
| S | 0.06  | S | 8    | R | 128  | R | 0.5   | S |
| S | 0.5   | S | 128  | R | >128 | R | 2     | S |
| S | 0.5   | S | 64   | R | >128 | R | 8     | S |
| S | 0.06  | S | 128  | R | 128  | R | 32    | R |
| S | 0.25  | S | >128 | R | >128 | R | 64    | R |
| R | >128  | R | >128 | R | >128 | R | >128  | R |
| S | 0.06  | S | 128  | R | 128  | R | 64    | R |
| R | 128   | R | >128 | R | >128 | R | >128  | R |
| S | 0.125 | S | >128 | R | >128 | R | 8     | S |
| S | 0.25  | S | >128 | R | >128 | R | 8     | S |
| S | 0.125 | S | >128 | R | 16   | I | 64    | R |
| I | 4     | R | >128 | R | 8    | S | >128  | R |
| S | 0.125 | S | 128  | R | >128 | R | 8     | S |
| S | 0.125 | S | >128 | R | >128 | R | 32    | R |
| R | 4     | R | 0.25 | S | 8    | S | 0.5   | S |
| R | 2     | I | 64   | R | >128 | R | 1     | S |
| S | 0.125 | S | >128 | R | >128 | R | 64    | R |
| S | 0.06  | S | 8    | R | 128  | R | 0.5   | S |
| S | 0.125 | S | 128  | R | 128  | R | 32    | R |
| R | 8     | R | 128  | R | >128 | R | 16    | I |
| S | 0.25  | S | 128  | R | 128  | R | 32    | R |
| S | 0.125 | S | >128 | R | 128  | R | 32    | R |
| S | 0.125 | S | >128 | R | 64   | R | >128  | R |
| I | 0.125 | S | 128  | R | 128  | R | 32    | R |
| R | 4     | R | >128 | R | >128 | R | >128  | R |
| S | 0.25  | S | 128  | R | >128 | R | 0.5   | S |
| S | 0.06  | S | 64   | R | 128  | R | 0.25  | S |
| R | >128  | R | >128 | R | >128 | R | 32    | R |
| S | 0.25  | S | >128 | R | >128 | R | 16    | I |
| R | 64    | R | 2    | I | 8    | S | 32    | R |
| S | 0.125 | S | 128  | R | 64   | R | 64    | R |
| S | 0.06  | S | 128  | R | 64   | R | 16    | I |
| R | 0.5   | S | 32   | R | >128 | R | 0.25  | S |
| S | 0.5   | S | 32   | R | >128 | R | 8     | S |
| S | 0.25  | S | 128  | R | >128 | R | 8     | S |
| S | 0.06  | S | >128 | R | 128  | R | 64    | R |
| I | 0.25  | S | 128  | R | >128 | R | 4     | S |
| S | 0.25  | S | >128 | R | 2    | S | >128  | R |
| S | 0.25  | S | >128 | R | >128 | R | 64    | R |

|   |       |   |      |   |      |   |       |   |
|---|-------|---|------|---|------|---|-------|---|
| I | 0.25  | S | 128  | R | 16   | I | 4     | S |
| S | 0.25  | S | 64   | R | >128 | R | 2     | S |
| R | 4     | R | 128  | R | >128 | R | 2     | S |
| S | 0.125 | S | >128 | R | 128  | R | 128   | R |
| S | 0.06  | S | 128  | R | 64   | R | 64    | R |
| S | 0.06  | S | 128  | R | 128  | R | 64    | R |
| S | 0.25  | S | >128 | R | >128 | R | 64    | R |
| S | 0.125 | S | >128 | R | 128  | R | 64    | R |
| S | 0.5   | S | >128 | R | >128 | R | >128  | R |
| I | 0.25  | S | 128  | R | >128 | R | 16    | I |
| S | 0.25  | S | >128 | R | >128 | R | 128   | R |
| S | 0.125 | S | 64   | R | >128 | R | 1     | S |
| R | 1     | S | >128 | R | >128 | R | >128  | R |
| S | 0.06  | S | 16   | R | 64   | R | 0.5   | S |
| S | 0.125 | S | 8    | R | 128  | R | 0.125 | S |
| S | 0.125 | S | >128 | R | 128  | R | 32    | R |
| S | 0.125 | S | >128 | R | 128  | R | >128  | R |
| S | 0.125 | S | 128  | R | 128  | R | 64    | R |
| S | 0.125 | S | >128 | R | 64   | R | 16    | I |
| S | 0.5   | S | 64   | R | >128 | R | 32    | R |
| S | 0.125 | S | >128 | R | >128 | R | 32    | R |
| S | 0.125 | S | >128 | R | >128 | R | 128   | R |
| S | 0.25  | S | >128 | R | >128 | R | 4     | S |
| R | 1     | S | >128 | R | >128 | R | 128   | R |
| S | 0.25  | S | >128 | R | >128 | R | 128   | R |
| S | 0.5   | S | 64   | R | >128 | R | 16    | I |
| S | 0.125 | S | >128 | R | >128 | R | 32    | R |
| S | 0.125 | S | >128 | R | >128 | R | 128   | R |
| I | 0.125 | S | 8    | R | 128  | R | 0.25  | S |
| S | 0.125 | S | >128 | R | 128  | R | 32    | R |
| S | 0.125 | S | 128  | R | >128 | R | 2     | S |
| S | 0.06  | S | 128  | R | 32   | I | 32    | R |
| S | 0.125 | S | >128 | R | >128 | R | 64    | R |
| S | 0.125 | S | >128 | R | >128 | R | 16    | I |
| R | 16    | R | 64   | R | >128 | R | 64    | R |
| S | 0.125 | S | >128 | R | 128  | R | 32    | R |
| S | 0.25  | S | 64   | R | >128 | R | 2     | S |
| S | 0.25  | S | >128 | R | >128 | R | 4     | S |
| R | 1     | S | >128 | R | >128 | R | 64    | R |
| S | 0.125 | S | 128  | R | >128 | R | 2     | S |
| S | 0.5   | S | 128  | R | >128 | R | 64    | R |
| S | 0.25  | S | >128 | R | 128  | R | 128   | R |
| S | 0.125 | S | 64   | R | 128  | R | 8     | S |
| S | 0.125 | S | >128 | R | 64   | R | 64    | R |
| S | 0.25  | S | >128 | R | >128 | R | 128   | R |
| R | 4     | R | >128 | R | >128 | R | 32    | R |

|   |       |   |      |   |      |   |      |   |
|---|-------|---|------|---|------|---|------|---|
| S | 0.5   | S | 64   | R | >128 | R | 16   | I |
| S | 0.125 | S | >128 | R | 128  | R | 64   | R |
| S | 0.5   | S | 64   | R | >128 | R | 8    | S |
| S | 0.25  | S | >128 | R | 4    | S | 64   | R |
| S | 0.125 | S | >128 | R | >128 | R | 16   | I |
| I | 0.5   | S | >128 | R | >128 | R | 32   | R |
| S | 0.25  | S | >128 | R | >128 | R | 128  | R |
| R | 4     | R | >128 | R | >128 | R | 8    | S |
| S | 0.125 | S | >128 | R | >128 | R | 4    | S |
| S | 0.125 | S | 8    | R | 128  | R | 1    | S |
| S | 0.25  | S | >128 | R | >128 | R | 128  | R |
| S | 0.125 | S | 64   | R | 64   | R | 16   | I |
| S | 0.125 | S | 128  | R | >128 | R | 16   | I |
| R | 4     | R | >128 | R | >128 | R | 128  | R |
| S | 0.25  | S | >128 | R | >128 | R | 128  | R |
| S | 0.125 | S | 128  | R | 128  | R | 32   | R |
| S | 0.06  | S | >128 | R | >128 | R | 0.5  | S |
| I | 0.5   | S | 64   | R | >128 | R | 8    | S |
| S | 0.5   | S | >128 | R | >128 | R | 128  | R |
| S | 0.06  | S | 16   | R | 64   | R | 4    | S |
| S | 0.25  | S | 64   | R | >128 | R | 16   | I |
| S | 0.5   | S | >128 | R | >128 | R | 128  | R |
| R | 8     | R | >128 | R | >128 | R | 2    | S |
| S | 0.25  | S | >128 | R | >128 | R | 128  | R |
| S | 0.25  | S | >128 | R | >128 | R | >128 | R |
| R | 0.5   | S | >128 | R | >128 | R | >128 | R |
| S | 0.125 | S | 64   | R | 128  | R | 0.5  | S |
| R | 0.5   | S | 128  | R | 64   | R | 64   | R |
| S | 0.25  | S | >128 | R | 32   | I | >128 | R |
| S | 0.25  | S | >128 | R | 4    | S | 128  | R |
| S | 0.06  | S | 128  | R | 128  | R | 64   | R |
| S | 0.06  | S | >128 | R | 64   | R | 64   | R |
| S | 0.125 | S | >128 | R | 64   | R | >128 | R |
| S | 0.06  | S | 8    | R | 64   | R | 1    | S |
| I | 1     | S | 128  | R | >128 | R | 128  | R |
| S | 0.125 | S | >128 | R | >128 | R | 64   | R |
| S | 0.125 | S | >128 | R | 128  | R | 64   | R |
| S | 0.06  | S | >128 | R | >128 | R | 64   | R |
| I | 0.125 | S | 128  | R | >128 | R | 0.5  | S |
| S | 0.5   | S | >128 | R | 64   | R | >128 | R |
| S | 0.125 | S | 32   | R | 16   | I | 4    | S |
| S | 0.125 | S | >128 | R | 128  | R | 64   | R |
| S | 0.125 | S | >128 | R | 128  | R | 64   | R |
| S | 0.125 | S | 64   | R | 64   | R | 32   | R |
| S | 0.06  | S | 128  | R | >128 | R | 2    | S |
| S | 0.06  | S | 128  | R | >128 | R | 2    | S |

|   |       |   |      |   |      |   |       |   |
|---|-------|---|------|---|------|---|-------|---|
| S | 0.06  | S | 2    | I | 128  | R | 0.125 | S |
| S | 0.06  | S | 16   | R | >128 | R | 0.25  | S |
| S | 0.06  | S | >128 | R | 128  | R | >128  | R |
| S | 0.06  | S | >128 | R | 64   | R | 64    | R |
| I | 0.25  | S | 128  | R | 128  | R | 64    | R |
| R | 2     | I | 64   | R | >128 | R | 16    | I |
| S | 0.06  | S | 8    | R | 64   | R | 0.125 | S |
| S | 0.125 | S | 128  | R | >128 | R | 4     | S |
| R | 4     | R | >128 | R | >128 | R | >128  | R |
| S | 0.06  | S | 32   | R | 64   | R | 0.125 | S |
| S | 0.5   | S | 64   | R | >128 | R | 1     | S |
| S | <0.03 | S | 128  | R | >128 | R | 2     | S |
| S | 0.125 | S | 64   | R | 64   | R | 32    | R |
| S | 0.06  | S | 32   | R | 128  | R | 0.125 | S |
| S | 0.25  | S | 8    | R | 128  | R | 0.125 | S |
| S | 0.125 | S | >128 | R | >128 | R | 4     | S |
| S | 0.06  | S | >128 | R | >128 | R | 2     | S |
| S | 0.5   | S | >128 | R | >128 | R | >128  | R |
| S | 0.25  | S | 16   | R | >128 | R | 0.5   | S |
| S | 0.06  | S | >128 | R | 32   | I | 32    | R |
| S | 0.125 | S | >128 | R | 0.25 | S | 128   | R |
| S | 0.25  | S | 128  | R | >128 | R | 4     | S |
| S | 0.125 | S | 64   | R | 128  | R | 0.5   | S |
| S | 0.06  | S | 4    | R | 128  | R | 0.25  | S |
| S | 0.06  | S | >128 | R | 128  | R | 64    | R |
| S | 0.06  | S | 2    | I | 128  | R | 1     | S |
| S | 0.125 | S | 32   | R | 128  | R | 32    | R |
| S | 0.06  | S | 128  | R | >128 | R | 2     | S |
| S | 0.125 | S | >128 | R | >128 | R | 4     | S |
| S | 0.25  | S | >128 | R | >128 | R | 128   | R |
| S | 0.06  | S | >128 | R | 128  | R | 128   | R |
| S | 0.06  | S | >128 | R | 128  | R | 64    | R |
| S | 0.125 | S | >128 | R | 128  | R | 64    | R |
| S | 0.25  | S | >128 | R | 1    | S | 128   | R |
| I | 1     | S | >128 | R | >128 | R | >128  | R |
| S | 0.06  | S | 128  | R | 128  | R | 64    | R |
| S | 0.125 | S | >128 | R | 32   | I | >128  | R |
| S | 0.25  | S | 64   | R | >128 | R | 0.5   | S |
| S | 0.06  | S | >128 | R | 128  | R | 64    | R |
| S | 0.125 | S | 64   | R | >128 | R | 0.5   | S |
| S | 0.25  | S | >128 | R | 128  | R | 128   | R |
| S | 0.06  | S | 2    | I | 32   | I | 0.125 | S |
| S | 0.06  | S | 64   | R | 128  | R | 0.5   | S |
| S | 0.125 | S | 128  | R | >128 | R | 4     | S |
| I | 0.06  | S | 16   | R | 128  | R | 0.25  | S |
| S | 0.125 | S | 64   | R | >128 | R | 2     | S |



|   |       |   |      |   |      |   |       |   |
|---|-------|---|------|---|------|---|-------|---|
| I | 0.125 | S | 0.5  | S | 128  | R | 0.06  | S |
| S | 0.125 | S | 64   | R | >128 | R | 1     | S |
| I | 0.5   | S | >128 | R | >128 | R | 4     | S |
| S | 0.5   | S | >128 | R | >128 | R | 16    | I |
| S | 0.125 | S | 32   | R | >128 | R | 0.25  | S |
| I | >128  | R | >128 | R | 32   | I | >128  | R |
| I | 0.125 | S | 32   | R | >128 | R | 2     | S |
| S | 0.5   | S | >128 | R | >128 | R | 4     | S |
| R | 0.5   | S | >128 | R | >128 | R | >128  | R |
| S | 0.125 | S | 128  | R | 128  | R | 32    | R |
| S | 0.06  | S | 8    | R | 16   | I | 1     | S |
| R | 128   | R | >128 | R | >128 | R | 128   | R |
| S | 0.06  | S | 8    | R | 64   | R | 0.25  | S |
| S | 0.06  | S | >128 | R | >128 | R | 32    | R |
| S | 0.06  | S | >128 | R | 128  | R | 64    | R |
| S | 0.06  | S | >128 | R | 128  | R | 64    | R |
| S | 0.5   | S | 64   | R | 32   | I | 4     | S |
| R | 8     | R | >128 | R | >128 | R | >128  | R |
| S | 0.06  | S | 4    | R | 64   | R | 0.125 | S |
| S | 0.125 | S | >128 | R | >128 | R | 64    | R |
| S | 0.125 | S | 64   | R | >128 | R | 1     | S |
| R | 4     | R | 128  | R | >128 | R | 128   | R |
| S | 0.125 | S | 64   | R | >128 | R | 2     | S |
| S | 0.125 | S | 64   | R | 128  | R | 0.25  | S |
| S | 0.125 | S | >128 | R | 8    | S | >128  | R |
| S | 0.125 | S | 64   | R | >128 | R | 1     | S |
| R | 1     | S | >128 | R | >128 | R | 4     | S |
| S | 0.125 | S | 128  | R | >128 | R | 64    | R |
| S | 0.06  | S | 128  | R | >128 | R | 32    | R |
| S | 0.125 | S | >128 | R | 32   | I | 128   | R |
| S | 0.125 | S | 8    | R | >128 | R | 0.25  | S |
| R | 16    | R | >128 | R | 64   | R | 32    | R |
| I | 1     | S | >128 | R | >128 | R | >128  | R |
| S | 0.06  | S | 2    | I | 64   | R | 0.125 | S |
| I | 0.25  | S | 2    | I | 64   | R | 2     | S |
| R | 1     | S | 4    | R | 32   | I | 2     | S |
| S | 0.25  | S | >128 | R | >128 | R | 64    | R |
| I | 1     | S | >128 | R | 64   | R | 4     | S |
| S | 0.06  | S | 32   | R | >128 | R | 0.5   | S |
| S | <0.03 | S | 64   | R | >128 | R | 0.5   | S |
| S | 0.25  | S | >128 | R | >128 | R | 8     | S |
| S | 0.125 | S | 64   | R | >128 | R | 1     | S |
| S | 0.125 | S | >128 | R | >128 | R | 2     | S |
| S | 0.06  | S | >128 | R | 128  | R | 32    | R |
| S | 0.06  | S | >128 | R | 128  | R | 64    | R |
| S | 0.06  | S | >128 | R | >128 | R | 64    | R |

|   |       |   |      |   |      |   |      |   |
|---|-------|---|------|---|------|---|------|---|
| S | 0.125 | S | 128  | R | 64   | R | 32   | R |
| S | 0.5   | S | >128 | R | >128 | R | 64   | R |
| R | 16    | R | >128 | R | >128 | R | >128 | R |
| S | 0.06  | S | >128 | R | 128  | R | 32   | R |
| S | <0.03 | S | 2    | I | 32   | I | 0.25 | S |
| S | 0.125 | S | 64   | R | 64   | R | 32   | R |
| S | 0.125 | S | >128 | R | >128 | R | 2    | S |
| S | 0.5   | S | 64   | R | >128 | R | 1    | S |
| S | 0.5   | S | >128 | R | >128 | R | 2    | S |
| S | 0.25  | S | >128 | R | >128 | R | 8    | S |
| S | 0.06  | S | >128 | R | 128  | R | 64   | R |
| R | 4     | R | >128 | R | >128 | R | 4    | S |
| S | 0.25  | S | >128 | R | >128 | R | 4    | S |
| S | 0.06  | S | 128  | R | 64   | R | 32   | R |
| S | 0.06  | S | 128  | R | 128  | R | 64   | R |
| S | 0.06  | S | >128 | R | 0.25 | S | 32   | R |
| S | 0.06  | S | 128  | R | 128  | R | 64   | R |
| S | 0.125 | S | >128 | R | 128  | R | 64   | R |
| S | 0.06  | S | >128 | R | 128  | R | 32   | R |
| S | 0.125 | S | >128 | R | 128  | R | 64   | R |
| S | 0.06  | S | 8    | R | 64   | R | 0.25 | S |
| I | 0.5   | S | >128 | R | >128 | R | 2    | S |
| S | 0.25  | S | >128 | R | >128 | R | 64   | R |
| I | 0.25  | S | >128 | R | >128 | R | 1    | S |
| S | 0.25  | S | >128 | R | >128 | R | 4    | S |
| S | 0.125 | S | >128 | R | 64   | R | 64   | R |
| S | 0.06  | S | 128  | R | 64   | R | 32   | R |
| S | 0.25  | S | >128 | R | >128 | R | >128 | R |
| S | 0.06  | S | >128 | R | 128  | R | 64   | R |
| S | 0.25  | S | 128  | R | >128 | R | 4    | S |
| S | <0.03 | S | 64   | R | 32   | I | 0.25 | S |
| S | 0.125 | S | 32   | R | >128 | R | 0.25 | S |

| AMK1 | AMK_C | GEN  | GEN_C | CIP   | CIP_C | COL | COL_C | TGC  |
|------|-------|------|-------|-------|-------|-----|-------|------|
| 2    | S     | 32   | R     | 0.25  | S     | 0.5 | S     | 1    |
| 4    | S     | 1    | S     | 1     | S     | 1   | S     | 0.25 |
| 2    | S     | 2    | S     | 2     | I     | 1   | S     | 0.25 |
| 1    | S     | 0.5  | S     | 0.125 | S     | 0.5 | S     | 0.5  |
| 1    | S     | 0.5  | S     | 0.06  | S     | 0.5 | S     | 0.5  |
| 1    | S     | 0.25 | S     | <0.03 | S     | 1   | S     | 0.5  |
| 2    | S     | 16   | R     | 0.125 | S     | 1   | S     | 4    |
| 2    | S     | 0.5  | S     | 0.06  | S     | 1   | S     | 0.5  |
| 1    | S     | 1    | S     | 32    | R     | 1   | S     | 16   |
| 2    | S     | 0.5  | S     | 0.06  | S     | 1   | S     | 1    |
| 1    | S     | 0.5  | S     | 0.06  | S     | 1   | S     | 1    |
| 1    | S     | 0.25 | S     | <0.03 | S     | 1   | S     | 0.5  |
| 2    | S     | 0.5  | S     | 0.06  | S     | 1   | S     | 1    |
| 2    | S     | 0.5  | S     | 0.06  | S     | 1   | S     | 1    |
| 2    | S     | 0.5  | S     | 0.06  | S     | 1   | S     | 1    |
| 1    | S     | 1    | S     | 0.5   | S     | 1   | S     | 4    |
| 1    | S     | 0.25 | S     | 0.06  | S     | 1   | S     | 0.5  |
| 1    | S     | 1    | S     | 2     | I     | 32  | R     | 2    |
| 2    | S     | 0.5  | S     | <0.03 | S     | 1   | S     | 1    |
| 2    | S     | 0.5  | S     | <0.03 | S     | 1   | S     | 0.5  |
| 2    | S     | 0.5  | S     | <0.03 | S     | 1   | S     | 1    |
| 1    | S     | 1    | S     | 0.06  | S     | 1   | S     | 0.25 |
| 2    | S     | 0.5  | S     | 0.06  | S     | 1   | S     | 0.5  |
| 1    | S     | 1    | S     | <0.03 | S     | 1   | S     | 8    |
| 2    | S     | 0.5  | S     | 1     | S     | 1   | S     | 0.5  |
| 1    | S     | 0.25 | S     | <0.03 | S     | 1   | S     | 0.5  |
| 1    | S     | 64   | R     | <0.03 | S     | 1   | S     | 1    |
| 1    | S     | 1    | S     | 0.25  | S     | 4   | R     | 1    |
| 2    | S     | 0.5  | S     | 0.25  | S     | 1   | S     | 0.5  |
| 2    | S     | 64   | R     | >128  | R     | 0.5 | S     | 1    |
| 2    | S     | 0.5  | S     | >128  | R     | 0.5 | S     | 1    |
| 2    | S     | 64   | R     | 128   | R     | 0.5 | S     | 0.5  |
| 2    | S     | 0.5  | S     | 2     | I     | 0.5 | S     | 1    |
| 1    | S     | 0.5  | S     | 0.5   | S     | 0.5 | S     | 0.5  |
| 2    | S     | 1    | S     | >128  | R     | 0.5 | S     | 0.5  |
| 16   | S     | 0.5  | S     | 0.5   | S     | 0.5 | S     | 0.5  |
| 4    | S     | 256  | R     | 8     | R     | 1   | S     | 0.5  |
| 8    | S     | 0.5  | S     | >128  | R     | 0.5 | S     | 1    |
| 2    | S     | 0.5  | S     | 0.06  | S     | 0.5 | S     | 0.5  |
| 4    | S     | 0.5  | S     | 0.06  | S     | 0.5 | S     | 1    |
| 2    | S     | 1    | S     | >128  | R     | 0.5 | S     | 0.25 |
| >128 | R     | 256  | R     | 128   | R     | 1   | S     | 0.5  |
| >128 | R     | 256  | R     | 64    | R     | 0.5 | S     | 0.5  |
| 8    | S     | 1    | S     | 32    | R     | 1   | S     | 4    |
| >128 | R     | 256  | R     | 128   | R     | 1   | S     | 1    |

|      |   |      |   |       |   |     |   |      |
|------|---|------|---|-------|---|-----|---|------|
| >128 | R | 256  | R | >128  | R | 0.5 | S | 0.5  |
| >128 | R | 0.5  | S | >128  | R | 1   | S | 1    |
| 1    | S | 0.25 | S | 0.5   | S | 0.5 | S | 1    |
| 1    | S | 0.25 | S | <0.03 | S | 0.5 | S | 0.5  |
| 0.5  | S | 4    | S | 1     | S | 0.5 | S | 1    |
| 32   | I | 1    | S | >128  | R | 0.5 | S | 1    |
| >128 | R | 256  | R | 64    | R | 1   | S | 0.5  |
| 1    | S | 0.25 | S | >128  | R | 1   | S | 1    |
| 2    | S | 0.5  | S | 1     | S | 1   | S | 0.5  |
| 1    | S | 32   | R | 0.5   | S | 0.5 | S | 1    |
| 2    | S | 128  | R | 0.125 | S | 0.5 | S | 1    |
| 16   | S | 2    | S | >128  | R | 0.5 | S | 8    |
| 1    | S | 0.25 | S | >128  | R | 1   | S | 0.5  |
| 1    | S | 0.25 | S | >128  | R | 1   | S | 0.5  |
| 32   | I | 32   | R | 64    | R | 0.5 | S | 1    |
| 2    | S | 1    | S | 0.25  | S | 1   | S | 4    |
| 4    | S | 1    | S | 8     | R | 1   | S | 1    |
| 1    | S | 0.5  | S | 0.06  | S | 1   | S | 1    |
| 1    | S | 1    | S | 0.25  | S | 1   | S | 1    |
| 1    | S | 0.25 | S | <0.03 | S | 1   | S | 0.5  |
| 1    | S | 0.25 | S | <0.03 | S | 128 | R | 0.5  |
| 2    | S | 0.5  | S | 0.5   | S | 1   | S | 1    |
| 1    | S | 0.25 | S | 0.06  | S | 32  | R | 1    |
| 2    | S | 0.5  | S | 0.5   | S | 8   | R | 1    |
| 1    | S | 0.25 | S | 1     | S | 1   | S | 1    |
| 1    | S | 2    | S | >128  | R | 1   | S | 8    |
| 1    | S | 0.25 | S | 16    | R | 1   | S | 8    |
| 1    | S | 0.25 | S | <0.03 | S | 1   | S | 1    |
| 1    | S | 0.5  | S | 2     | I | 1   | S | 1    |
| 1    | S | 1    | S | 1     | S | 1   | S | 4    |
| 4    | S | 16   | R | >128  | R | 1   | S | 1    |
| 8    | S | 64   | R | >128  | R | 1   | S | 0.25 |
| 4    | S | 64   | R | >128  | R | 0.5 | S | 1    |
| 2    | S | 1    | S | 0.5   | S | 1   | S | 0.25 |
| 4    | S | 1    | S | 0.25  | S | 0.5 | S | 0.25 |
| >128 | R | 256  | R | >128  | R | 1   | S | 1    |
| 1    | S | 0.25 | S | >128  | R | 1   | S | 1    |
| >128 | R | 256  | R | 128   | R | 1   | S | 1    |
| 1    | S | 16   | R | >128  | R | 0.5 | S | 1    |
| >128 | R | 256  | R | 128   | R | 1   | S | 1    |
| 1    | S | 4    | S | >128  | R | 1   | S | 0.5  |
| 1    | S | 1    | S | 0.125 | S | 2   | S | 1    |
| >128 | R | 0.5  | S | 128   | R | 0.5 | S | 1    |
| >128 | R | 256  | R | 128   | R | 0.5 | S | 1    |
| 1    | S | 2    | S | 128   | R | 1   | S | 1    |
| 2    | S | 16   | R | >128  | R | 32  | R | 4    |

|      |   |      |   |       |   |      |   |      |
|------|---|------|---|-------|---|------|---|------|
| 1    | S | 4    | S | 32    | R | 1    | S | 1    |
| 2    | S | 1    | S | 64    | R | 0.5  | S | 2    |
| 2    | S | 0.5  | S | 128   | R | 1    | S | 1    |
| 32   | I | 32   | R | 0.25  | S | 0.5  | S | 0.25 |
| 1    | S | 1    | S | 0.125 | S | 0.5  | S | 1    |
| 1    | S | 1    | S | 4     | R | 1    | S | 0.5  |
| 4    | S | 16   | R | 8     | R | 1    | S | 1    |
| 2    | S | 8    | I | 0.06  | S | 1    | S | 0.5  |
| 2    | S | 64   | R | 128   | R | 0.5  | S | 0.5  |
| 2    | S | 16   | R | <0.03 | S | 0.5  | S | 0.5  |
| >128 | R | 256  | R | 16    | R | 0.5  | S | 0.5  |
| >128 | R | 256  | R | 128   | R | 1    | S | 1    |
| 1    | S | 16   | R | 4     | R | 1    | S | 0.25 |
| 4    | S | 64   | R | 128   | R | 1    | S | 1    |
| 2    | S | 32   | R | 128   | R | 0.5  | S | 0.5  |
| >128 | R | 256  | R | >128  | R | 1    | S | 1    |
| 2    | S | 1    | S | >128  | R | 1    | S | 0.5  |
| 2    | S | 1    | S | 1     | S | 1    | S | 0.25 |
| 2    | S | 16   | R | 0.5   | S | 0.5  | S | 4    |
| >128 | R | 256  | R | 128   | R | 2    | S | 1    |
| >128 | R | 0.5  | S | 128   | R | 1    | S | 1    |
| 2    | S | 16   | R | >128  | R | 1    | S | 1    |
| >128 | R | 256  | R | 128   | R | 2    | S | 1    |
| 1    | S | 1    | S | 4     | R | 1    | S | 4    |
| 2    | S | 2    | S | 16    | R | 1    | S | 0.5  |
| >128 | R | 256  | R | >128  | R | 1    | S | 1    |
| 2    | S | 256  | R | >128  | R | 1    | S | 1    |
| 4    | S | 2    | S | 1     | S | 2    | S | 4    |
| 1    | S | 0.25 | S | 0.125 | S | 1    | S | 0.5  |
| 1    | S | 1    | S | 0.25  | S | 1    | S | 8    |
| 1    | S | 0.25 | S | 0.06  | S | 1    | S | 0.5  |
| 32   | I | 1    | S | 128   | R | 1    | S | 1    |
| 4    | S | 16   | R | >128  | R | 1    | S | 1    |
| >128 | R | 256  | R | 128   | R | 16   | R | 0.5  |
| >128 | R | 256  | R | >128  | R | 1    | S | 1    |
| 8    | S | 1    | S | <0.03 | S | 0.5  | S | 0.25 |
| 4    | S | 2    | S | 64    | R | 0.5  | S | 0.5  |
| 16   | S | 256  | R | 128   | R | 0.5  | S | 1    |
| >128 | R | 256  | R | >128  | R | 1    | S | 1    |
| 2    | S | 16   | R | 128   | R | >128 | R | 1    |
| 4    | S | 4    | S | 64    | R | 1    | S | 0.25 |
| 2    | S | 1    | S | 8     | R | 0.5  | S | 16   |
| 2    | S | 1    | S | 0.125 | S | 1    | S | 1    |
| 16   | S | 64   | R | 64    | R | 0.5  | S | 1    |
| 2    | S | 1    | S | >128  | R | 1    | S | 1    |
| 2    | S | 1    | S | <0.03 | S | 1    | S | 0.5  |

|      |   |      |   |       |   |      |   |      |
|------|---|------|---|-------|---|------|---|------|
| 4    | S | 1    | S | >128  | R | 1    | S | 0.5  |
| 4    | S | 1    | S | 0.06  | S | 1    | S | 0.25 |
| 4    | S | 1    | S | 64    | R | 1    | S | 1    |
| >128 | R | 256  | R | >128  | R | 1    | S | 1    |
| >128 | R | 256  | R | >128  | R | 1    | S | 1    |
| 4    | S | 1    | S | 0.25  | S | 1    | S | 1    |
| 1    | S | 8    | I | >128  | R | 1    | S | 8    |
| 2    | S | 256  | R | 0.06  | S | >128 | R | 0.5  |
| 2    | S | 1    | S | >128  | R | 1    | S | 1    |
| >128 | R | 0.5  | S | >128  | R | 0.5  | S | 1    |
| >128 | R | 0.25 | S | 32    | R | 1    | S | 1    |
| >128 | R | 16   | R | 64    | R | 1    | S | 1    |
| 1    | S | 256  | R | 0.125 | S | 1    | S | 1    |
| >128 | R | 0.5  | S | 128   | R | 1    | S | 1    |
| 4    | S | 2    | S | 1     | S | 1    | S | 0.5  |
| >128 | R | 256  | R | >128  | R | 1    | S | 1    |
| 2    | S | 0.25 | S | >128  | R | 1    | S | 1    |
| 1    | S | 0.25 | S | >128  | R | 1    | S | 1    |
| >128 | R | 256  | R | 64    | R | 1    | S | 0.5  |
| 2    | S | 1    | S | 1     | S | 1    | S | 1    |
| 1    | S | 0.5  | S | <0.03 | S | 1    | S | 0.5  |
| 4    | S | 1    | S | 0.125 | S | 1    | S | 1    |
| 8    | S | 64   | R | >128  | R | 1    | S | 0.25 |
| 4    | S | 1    | S | 0.125 | S | 1    | S | 1    |
| 1    | S | 0.5  | S | 128   | R | 1    | S | 0.25 |
| 2    | S | 1    | S | 128   | R | 1    | S | 1    |
| 2    | S | 0.5  | S | >128  | R | 1    | S | 0.5  |
| >128 | R | 256  | R | 128   | R | 1    | S | 1    |
| 1    | S | 0.25 | S | 0.25  | S | 1    | S | 8    |
| 1    | S | 0.5  | S | 0.25  | S | 1    | S | 8    |
| 4    | S | 2    | S | 0.125 | S | 0.5  | S | 1    |
| 2    | S | 0.5  | S | 128   | R | 0.5  | S | 0.5  |
| >128 | R | 16   | R | >128  | R | 1    | S | 1    |
| >128 | R | 16   | R | >128  | R | 1    | S | 1    |
| >128 | R | 256  | R | 128   | R | 1    | S | 1    |
| 1    | S | 0.5  | S | <0.03 | S | 128  | R | 0.5  |
| 2    | S | 1    | S | 1     | S | 1    | S | 0.25 |
| >128 | R | 256  | R | 128   | R | 1    | S | 1    |
| 2    | S | 1    | S | 2     | I | 1    | S | 1    |
| 2    | S | 0.5  | S | 2     | I | 1    | S | 4    |
| 2    | S | 128  | R | >128  | R | 1    | S | 1    |
| 8    | S | 128  | R | 4     | R | 0.5  | S | 1    |
| >128 | R | 256  | R | >128  | R | 1    | S | 1    |
| 1    | S | 1    | S | 2     | I | 64   | R | 2    |
| 2    | S | 1    | S | 0.125 | S | 1    | S | 0.5  |
| 1    | S | 1    | S | 128   | R | 1    | S | 1    |

|      |   |      |   |       |   |      |   |      |
|------|---|------|---|-------|---|------|---|------|
| 2    | S | 16   | R | >128  | R | 1    | S | 0.5  |
| 0.5  | S | 8    | I | 64    | R | 0.5  | S | 1    |
| >128 | R | 256  | R | >128  | R | >128 | R | 1    |
| 16   | S | 1    | S | 128   | R | 1    | S | 1    |
| 1    | S | 1    | S | <0.03 | S | 0.5  | S | 1    |
| 1    | S | 2    | S | 2     | I | 1    | S | 1    |
| 32   | I | 2    | S | >128  | R | 1    | S | 1    |
| 1    | S | 0.5  | S | <0.03 | S | 1    | S | 1    |
| 2    | S | 0.5  | S | >128  | R | 1    | S | 1    |
| 2    | S | 1    | S | 64    | R | 1    | S | 1    |
| 8    | S | 1    | S | >128  | R | 1    | S | 1    |
| 2    | S | 1    | S | 2     | I | 1    | S | 1    |
| 2    | S | 0.5  | S | 0.06  | S | 128  | R | 0.5  |
| 1    | S | 1    | S | <0.03 | S | 1    | S | 1    |
| 2    | S | 16   | R | 128   | R | 1    | S | 0.5  |
| 2    | S | 16   | R | 64    | R | 1    | S | 0.5  |
| 1    | S | 0.25 | S | 0.06  | S | >128 | R | 1    |
| >128 | R | 1    | S | 128   | R | 1    | S | 1    |
| 2    | S | 128  | R | 0.25  | S | 1    | S | 0.5  |
| 4    | S | 1    | S | 0.125 | S | 1    | S | 1    |
| 1    | S | 1    | S | 4     | R | 1    | S | 0.5  |
| 2    | S | 64   | R | 64    | R | 1    | S | 0.5  |
| 1    | S | 0.5  | S | 0.25  | S | 1    | S | 16   |
| 2    | S | 0.5  | S | 0.06  | S | 2    | S | 4    |
| 2    | S | 64   | R | <0.03 | S | 1    | S | 0.25 |
| 2    | S | 1    | S | >128  | R | 1    | S | 4    |
| 2    | S | 16   | R | 64    | R | 1    | S | 1    |
| >128 | R | 256  | R | 128   | R | 1    | S | 1    |
| >128 | R | 256  | R | >128  | R | 1    | S | 1    |
| 8    | S | 1    | S | 8     | R | 1    | S | 1    |
| 2    | S | 1    | S | 128   | R | 1    | S | 2    |
| 1    | S | 1    | S | <0.03 | S | 1    | S | 4    |
| 1    | S | 16   | R | 0.125 | S | 0.5  | S | 1    |
| >128 | R | 1    | S | 128   | R | 1    | S | 4    |
| 4    | S | 64   | R | 32    | R | 1    | S | 0.5  |
| >128 | R | 16   | R | 32    | R | >128 | R | 4    |
| 1    | S | 0.5  | S | 0.5   | S | 1    | S | 0.5  |
| 1    | S | 0.5  | S | 0.25  | S | >128 | R | 1    |
| 1    | S | 0.5  | S | 0.5   | S | 1    | S | 4    |
| 1    | S | 16   | R | 0.5   | S | 1    | S | 4    |
| 1    | S | 0.5  | S | 128   | R | 1    | S | 1    |
| 2    | S | 64   | R | 64    | R | 1    | S | 4    |
| 1    | S | 0.25 | S | 16    | R | 1    | S | 1    |
| >128 | R | 256  | R | 128   | R | 1    | S | 1    |
| 1    | S | 2    | S | 1     | S | 1    | S | 0.5  |
| 1    | S | 0.5  | S | <0.03 | S | 1    | S | 0.5  |

|      |   |      |   |       |   |      |   |      |
|------|---|------|---|-------|---|------|---|------|
| 2    | S | 16   | R | >128  | R | 1    | S | 1    |
| 2    | S | 1    | S | 2     | I | 1    | S | 4    |
| 16   | S | 2    | S | 128   | R | 1    | S | 1    |
| >128 | R | 256  | R | >128  | R | 1    | S | 1    |
| 2    | S | 1    | S | 64    | R | 1    | S | 0.5  |
| 1    | S | 1    | S | >128  | R | 1    | S | 1    |
| 16   | S | 1    | S | >128  | R | 1    | S | 1    |
| 4    | S | 64   | R | 16    | R | 1    | S | 1    |
| 2    | S | 64   | R | 2     | I | 1    | S | 1    |
| 2    | S | 1    | S | 0.25  | S | 1    | S | 8    |
| 1    | S | 0.25 | S | 0.125 | S | >128 | R | 1    |
| 1    | S | 1    | S | 0.06  | S | 0.5  | S | 0.5  |
| 1    | S | 32   | R | 64    | R | 1    | S | 4    |
| 2    | S | 1    | S | 0.06  | S | 1    | S | 1    |
| 4    | S | 1    | S | 1     | S | 64   | R | 0.25 |
| >128 | R | 256  | R | 128   | R | 1    | S | 1    |
| 8    | S | 16   | R | 64    | R | 1    | S | 0.5  |
| 2    | S | 1    | S | 0.125 | S | 1    | S | 0.5  |
| >128 | R | 256  | R | >128  | R | 1    | S | 1    |
| 2    | S | 0.5  | S | 0.5   | S | >128 | R | 1    |
| 2    | S | 256  | R | 2     | I | 0.5  | S | 1    |
| 2    | S | 1    | S | <0.03 | S | 0.5  | S | 0.5  |
| 2    | S | 16   | R | >128  | R | 1    | S | 1    |
| 1    | S | 16   | R | >128  | R | 0.5  | S | 1    |
| 1    | S | 0.5  | S | >128  | R | 0.5  | S | 0.5  |
| 8    | S | 1    | S | 128   | R | 0.5  | S | 0.5  |
| 1    | S | 0.5  | S | 128   | R | 1    | S | 1    |
| >128 | R | 256  | R | 128   | R | 1    | S | 1    |
| 8    | S | 2    | S | 4     | R | 0.5  | S | 1    |
| 2    | S | 0.5  | S | 0.125 | S | 1    | S | 0.25 |
| 2    | S | 0.5  | S | 2     | I | 0.5  | S | 8    |
| 2    | S | 1    | S | 1     | S | 1    | S | 1    |
| 2    | S | 0.5  | S | 0.125 | S | 1    | S | 1    |
| 2    | S | 0.5  | S | 0.125 | S | 0.5  | S | 1    |
| 2    | S | 1    | S | 0.125 | S | 1    | S | 0.5  |
| 2    | S | 0.5  | S | 0.06  | S | 0.5  | S | 0.25 |
| 2    | S | 128  | R | 2     | I | 1    | S | 1    |
| 1    | S | 0.5  | S | <0.03 | S | 1    | S | 0.5  |
| 128  | R | 0.5  | S | 1     | S | >128 | R | 0.5  |
| 1    | S | 0.5  | S | 0.5   | S | 1    | S | 0.5  |
| 4    | S | 128  | R | 32    | R | 1    | S | 0.5  |
| 2    | S | 1    | S | >128  | R | 0.5  | S | 0.5  |
| 8    | S | 128  | R | 128   | R | 0.5  | S | 0.25 |
| 2    | S | 0.5  | S | 0.5   | S | 0.5  | S | 0.25 |
| 1    | S | 64   | R | >128  | R | 0.5  | S | 1    |
| 1    | S | 16   | R | 128   | R | 0.5  | S | 1    |



|      |   |      |   |       |   |      |   |       |
|------|---|------|---|-------|---|------|---|-------|
| 1    | S | 32   | R | 128   | R | 0.5  | S | 1     |
| >128 | R | 256  | R | 128   | R | 0.5  | S | 1     |
| 2    | S | 128  | R | >128  | R | 0.5  | S | 1     |
| 2    | S | 0.5  | S | <0.03 | S | 1    | S | 0.5   |
| 32   | I | 0.5  | S | 128   | R | 0.5  | S | 1     |
| 1    | S | 32   | R | 128   | R | 0.5  | S | 1     |
| 1    | S | 0.25 | S | 8     | R | 0.5  | S | 1     |
| >128 | R | 256  | R | 128   | R | 0.5  | S | 1     |
| 1    | S | 8    | I | <0.03 | S | 0.5  | S | 0.5   |
| 1    | S | 0.5  | S | 0.06  | S | 1    | S | 0.5   |
| 0.5  | S | 1    | S | 0.125 | S | 4    | R | 2     |
| 1    | S | 0.5  | S | 0.06  | S | 0.5  | S | 0.5   |
| >128 | R | 256  | R | 16    | R | 0.5  | S | 1     |
| 1    | S | 0.5  | S | 0.06  | S | 0.5  | S | 0.5   |
| 1    | S | 0.5  | S | 0.25  | S | 0.5  | S | 0.25  |
| 1    | S | 0.5  | S | >128  | R | 0.5  | S | 0.5   |
| 1    | S | 0.5  | S | 0.06  | S | 0.5  | S | 0.5   |
| 1    | S | 1    | S | 32    | R | 1    | S | 0.5   |
| 1    | S | 0.5  | S | <0.03 | S | 1    | S | 0.5   |
| 1    | S | 0.5  | S | <0.03 | S | 2    | S | 0.5   |
| 2    | S | 64   | R | 128   | R | 1    | S | 1     |
| 1    | S | 0.5  | S | 0.125 | S | 1    | S | 1     |
| 2    | S | 1    | S | <0.03 | S | 64   | R | 1     |
| 2    | S | 0.5  | S | 32    | R | 1    | S | 0.25  |
| 2    | S | 1    | S | 0.06  | S | 1    | S | 0.5   |
| 2    | S | 1    | S | 0.125 | S | 1    | S | 0.5   |
| 2    | S | 1    | S | 0.25  | S | 1    | S | 1     |
| 2    | S | 1    | S | 0.25  | S | 1    | S | 4     |
| 4    | S | 16   | R | 32    | R | 1    | S | 2     |
| 8    | S | 4    | S | 64    | R | 1    | S | 1     |
| 16   | S | 1    | S | 1     | S | 0.5  | S | 1     |
| 2    | S | 1    | S | 2     | I | 1    | S | 1     |
| >128 | R | 256  | R | 128   | R | 1    | S | 1     |
| >128 | R | 256  | R | 64    | R | 1    | S | 1     |
| 4    | S | 1    | S | >128  | R | 1    | S | 1     |
| 2    | S | 2    | S | 1     | S | 1    | S | 1     |
| 4    | S | 0.5  | S | 0.125 | S | >128 | R | 1     |
| >128 | R | 256  | R | 8     | R | >128 | R | 1     |
| >128 | R | 256  | R | 128   | R | 1    | S | 1     |
| 2    | S | 1    | S | 32    | R | 1    | S | 0.125 |
| 1    | S | 0.5  | S | 0.06  | S | 1    | S | 1     |
| 2    | S | 1    | S | 128   | R | 1    | S | 1     |
| 2    | S | 1    | S | 0.25  | S | 1    | S | 4     |
| 4    | S | 1    | S | 64    | R | 0.5  | S | 0.125 |
| 1    | S | 0.5  | S | 0.06  | S | 1    | S | 0.5   |
| 2    | S | 0.5  | S | <0.03 | S | 1    | S | 0.5   |

|      |   |      |   |       |   |      |   |      |
|------|---|------|---|-------|---|------|---|------|
| 2    | S | 4    | S | 64    | R | 1    | S | 1    |
| 2    | S | 1    | S | 0.125 | S | 4    | R | 0.5  |
| 1    | S | 0.5  | S | <0.03 | S | 1    | S | 0.5  |
| 1    | S | 0.5  | S | 1     | S | 1    | S | 0.5  |
| 8    | S | 16   | R | 8     | R | 1    | S | 4    |
| 16   | S | 8    | I | 0.5   | S | 1    | S | 0.25 |
| 16   | S | 1    | S | 0.25  | S | 1    | S | 4    |
| 2    | S | 0.5  | S | 0.06  | S | 1    | S | 0.5  |
| 1    | S | 16   | R | 16    | R | 1    | S | 1    |
| 1    | S | 1    | S | 1     | S | 1    | S | 0.5  |
| 2    | S | 0.5  | S | 0.06  | S | 1    | S | 0.5  |
| 1    | S | 0.5  | S | 1     | S | 1    | S | 1    |
| 8    | S | 128  | R | 32    | R | 1    | S | 4    |
| >128 | R | 256  | R | 0.5   | S | 1    | S | 1    |
| 1    | S | 0.5  | S | 0.06  | S | 2    | S | 0.5  |
| 2    | S | 0.5  | S | <0.03 | S | 1    | S | 0.5  |
| 4    | S | 1    | S | 4     | R | 1    | S | 0.25 |
| 8    | S | 64   | R | 32    | R | 1    | S | 0.5  |
| 1    | S | 16   | R | 128   | R | 1    | S | 1    |
| 1    | S | 16   | R | 2     | I | 1    | S | 4    |
| 1    | S | 32   | R | >128  | R | 64   | R | 1    |
| 0.5  | S | 32   | R | 128   | R | 1    | S | 1    |
| 2    | S | 16   | R | 0.5   | S | 1    | S | 1    |
| 2    | S | 64   | R | 64    | R | 1    | S | 0.5  |
| 1    | S | 1    | S | 4     | R | 1    | S | 8    |
| 2    | S | 1    | S | 0.25  | S | >128 | R | 2    |
| 1    | S | 8    | I | >128  | R | 0.5  | S | 8    |
| 2    | S | 8    | I | 0.5   | S | 1    | S | 0.25 |
| >128 | R | 256  | R | >128  | R | 1    | S | 1    |
| 2    | S | 16   | R | <0.03 | S | 0.5  | S | 0.5  |
| 1    | S | 32   | R | 128   | R | 0.5  | S | 1    |
| 2    | S | 16   | R | 2     | I | 1    | S | 1    |
| 16   | S | 256  | R | 16    | R | 1    | S | 1    |
| 0.5  | S | 16   | R | >128  | R | 1    | S | 2    |
| 2    | S | 1    | S | 0.5   | S | 1    | S | 0.25 |
| 1    | S | 1    | S | <0.03 | S | 1    | S | 0.5  |
| 1    | S | 0.5  | S | 0.06  | S | 1    | S | 1    |
| 32   | I | 1    | S | <0.03 | S | 2    | S | 1    |
| 1    | S | 256  | R | 32    | R | 64   | R | 1    |
| 2    | S | 0.5  | S | <0.03 | S | >128 | R | 0.5  |
| 2    | S | 64   | R | 1     | S | 1    | S | 1    |
| 8    | S | 256  | R | 8     | R | 1    | S | 1    |
| >128 | R | 256  | R | 128   | R | 1    | S | 1    |
| 1    | S | 64   | R | >128  | R | 1    | S | 1    |
| 2    | S | 0.25 | S | >128  | R | 1    | S | 1    |
| 1    | S | 0.5  | S | 64    | R | 16   | R | 1    |

|      |   |     |   |       |   |      |   |      |
|------|---|-----|---|-------|---|------|---|------|
| >128 | R | 256 | R | 128   | R | 1    | S | 1    |
| 16   | S | 0.5 | S | 32    | R | 1    | S | 1    |
| 1    | S | 0.5 | S | 0.125 | S | 1    | S | 0.5  |
| 1    | S | 4   | S | 0.06  | S | 1    | S | 1    |
| >128 | R | 256 | R | >128  | R | 0.5  | S | 0.5  |
| 1    | S | 64  | R | >128  | R | 1    | S | 1    |
| 8    | S | 1   | S | 128   | R | 1    | S | 0.5  |
| 1    | S | 1   | S | 128   | R | 1    | S | 0.5  |
| 1    | S | 16  | R | 128   | R | 1    | S | 0.5  |
| 8    | S | 4   | S | 128   | R | 1    | S | 0.5  |
| 2    | S | 1   | S | >128  | R | 0.5  | S | 0.5  |
| >128 | R | 256 | R | 128   | R | 0.5  | S | 1    |
| >128 | R | 256 | R | 128   | R | 1    | S | 1    |
| 1    | S | 1   | S | 128   | R | 1    | S | 1    |
| 1    | S | 0.5 | S | 0.125 | S | 1    | S | 0.5  |
| 1    | S | 0.5 | S | <0.03 | S | >128 | R | 1    |
| 1    | S | 16  | R | 16    | R | 1    | S | 0.5  |
| 8    | S | 16  | R | 16    | R | 1    | S | 0.5  |
| >128 | R | 256 | R | 128   | R | 1    | S | 1    |
| >128 | R | 256 | R | 128   | R | 1    | S | 1    |
| 2    | S | 0.5 | S | 128   | R | 1    | S | 1    |
| 2    | S | 0.5 | S | 0.5   | S | 1    | S | 1    |
| 16   | S | 16  | R | 128   | R | 1    | S | 0.25 |
| 8    | S | 1   | S | 1     | S | 1    | S | 1    |
| 1    | S | 0.5 | S | 0.5   | S | 1    | S | 1    |
| >128 | R | 256 | R | 128   | R | 1    | S | 1    |
| 2    | S | 0.5 | S | 0.125 | S | 1    | S | 1    |
| 2    | S | 2   | S | 32    | R | 1    | S | 8    |
| >128 | R | 16  | R | 128   | R | 1    | S | 0.5  |
| 2    | S | 128 | R | 128   | R | 0.5  | S | 1    |
| 1    | S | 128 | R | 8     | R | 1    | S | 1    |
| 1    | S | 0.5 | S | 128   | R | 1    | S | 1    |
| 2    | S | 0.5 | S | <0.03 | S | 1    | S | 1    |
| 2    | S | 0.5 | S | 0.25  | S | 32   | R | 1    |
| >128 | R | 256 | R | 128   | R | 1    | S | 1    |
| 2    | S | 0.5 | S | 64    | R | 32   | R | 1    |
| 2    | S | 64  | R | 32    | R | 1    | S | 0.5  |
| 1    | S | 64  | R | 128   | R | 1    | S | 1    |
| 4    | S | 1   | S | 64    | R | 1    | S | 0.25 |
| 4    | S | 128 | R | 32    | R | 1    | S | 0.5  |
| 1    | S | 0.5 | S | 128   | R | 2    | S | 1    |
| >128 | R | 256 | R | 128   | R | 1    | S | 0.5  |
| 2    | S | 1   | S | <0.03 | S | 0.5  | S | 0.25 |
| 1    | S | 1   | S | 128   | R | 1    | S | 1    |
| 2    | S | 2   | S | 128   | R | 0.5  | S | 0.5  |
| 2    | S | 0.5 | S | 128   | R | 1    | S | 1    |

|      |   |     |   |       |   |      |   |      |
|------|---|-----|---|-------|---|------|---|------|
| 2    | S | 1   | S | 0.06  | S | 1    | S | 1    |
| 2    | S | 64  | R | 128   | R | 1    | S | 1    |
| 4    | S | 2   | S | 128   | R | 1    | S | 0.25 |
| >128 | R | 256 | R | 64    | R | 1    | S | 1    |
| 2    | S | 64  | R | 64    | R | 1    | S | 0.25 |
| >128 | R | 16  | R | >128  | R | 1    | S | 0.5  |
| 4    | S | 16  | R | 128   | R | 1    | S | 1    |
| >128 | R | 256 | R | 128   | R | 1    | S | 1    |
| 2    | S | 1   | S | 128   | R | 1    | S | 1    |
| 4    | S | 128 | R | 4     | R | 1    | S | 0.5  |
| >128 | R | 256 | R | 128   | R | 1    | S | 1    |
| 2    | S | 256 | R | 32    | R | 1    | S | 1    |
| >128 | R | 256 | R | 128   | R | 1    | S | 1    |
| 8    | S | 8   | I | 32    | R | 1    | S | 0.5  |
| 1    | S | 64  | R | 128   | R | 1    | S | 1    |
| 8    | S | 1   | S | >128  | R | 1    | S | 0.25 |
| 8    | S | 1   | S | >128  | R | 1    | S | 1    |
| >128 | R | 256 | R | >128  | R | 1    | S | 1    |
| 2    | S | 0.5 | S | 0.06  | S | 1    | S | 0.5  |
| >128 | R | 256 | R | 64    | R | 2    | S | 1    |
| >128 | R | 16  | R | >128  | R | 1    | S | 2    |
| 4    | S | 128 | R | 64    | R | 1    | S | 0.25 |
| 2    | S | 1   | S | 128   | R | 1    | S | 0.5  |
| >128 | R | 16  | R | 128   | R | 1    | S | 0.5  |
| 8    | S | 1   | S | 1     | S | >128 | R | 1    |
| 2    | S | 0.5 | S | 16    | R | 1    | S | 1    |
| 1    | S | 1   | S | 128   | R | 1    | S | 0.5  |
| 4    | S | 1   | S | 32    | R | 1    | S | 1    |
| 1    | S | 0.5 | S | 128   | R | 1    | S | 1    |
| >128 | R | 256 | R | >128  | R | 1    | S | 1    |
| 1    | S | 0.5 | S | 128   | R | 1    | S | 1    |
| 1    | S | 128 | R | 2     | I | 0.5  | S | 0.5  |
| >128 | R | 256 | R | >128  | R | 1    | S | 1    |
| 2    | S | 128 | R | 128   | R | 1    | S | 0.5  |
| 1    | S | 0.5 | S | 0.06  | S | 1    | S | 0.5  |
| 1    | S | 64  | R | 128   | R | 1    | S | 1    |
| >128 | R | 256 | R | 128   | R | 1    | S | 1    |
| 1    | S | 0.5 | S | 0.125 | S | 1    | S | 0.5  |
| 1    | S | 4   | S | 128   | R | 1    | S | 16   |
| 8    | S | 1   | S | 4     | R | 4    | R | 2    |
| 2    | S | 1   | S | 64    | R | 0.5  | S | 0.25 |
| 1    | S | 64  | R | 128   | R | 1    | S | 1    |
| 1    | S | 1   | S | 32    | R | 1    | S | 1    |
| >128 | R | 256 | R | >128  | R | 1    | S | 1    |
| 1    | S | 0.5 | S | 0.125 | S | >128 | R | 1    |
| >128 | R | 256 | R | 128   | R | 1    | S | 1    |

|      |   |     |   |       |   |      |   |      |
|------|---|-----|---|-------|---|------|---|------|
| >128 | R | 256 | R | 128   | R | 1    | S | 1    |
| 2    | S | 1   | S | 0.25  | S | 1    | S | 2    |
| 1    | S | 0.5 | S | 128   | R | 1    | S | 1    |
| 1    | S | 32  | R | 128   | R | 1    | S | 1    |
| 8    | S | 4   | S | 2     | I | 1    | S | 0.5  |
| 1    | S | 0.5 | S | <0.03 | S | 1    | S | 1    |
| 4    | S | 2   | S | 64    | R | 1    | S | 0.25 |
| 1    | S | 16  | R | >128  | R | 1    | S | 4    |
| 4    | S | 1   | S | 16    | R | 0.5  | S | 4    |
| 2    | S | 1   | S | 128   | R | 0.5  | S | 1    |
| 2    | S | 1   | S | 0.06  | S | 0.5  | S | 0.5  |
| >128 | R | 256 | R | 128   | R | 1    | S | 1    |
| 2    | S | 0.5 | S | 128   | R | 1    | S | 1    |
| 1    | S | 32  | R | 0.5   | S | 0.5  | S | 0.25 |
| 1    | S | 0.5 | S | 0.06  | S | 1    | S | 1    |
| 1    | S | 0.5 | S | 1     | S | >128 | R | 0.5  |
| 1    | S | 0.5 | S | 0.06  | S | 1    | S | 0.5  |
| 2    | S | 1   | S | >128  | R | 1    | S | 2    |
| 1    | S | 1   | S | 2     | I | 1    | S | 8    |
| 4    | S | 1   | S | 8     | R | 1    | S | 0.5  |
| 1    | S | 16  | R | 128   | R | 1    | S | 0.5  |
| 1    | S | 1   | S | 128   | R | 0.5  | S | 0.5  |
| 32   | I | 16  | R | 2     | I | 1    | S | 2    |
| 2    | S | 16  | R | 8     | R | 4    | R | 0.5  |
| >128 | R | 256 | R | 16    | R | 1    | S | 0.5  |
| 1    | S | 16  | R | 1     | S | 0.5  | S | 1    |
| 2    | S | 1   | S | >128  | R | 1    | S | 8    |
| 2    | S | 1   | S | 128   | R | >128 | R | 1    |
| 2    | S | 64  | R | 128   | R | >128 | R | 1    |
| 4    | S | 1   | S | 0.06  | S | 0.5  | S | 0.25 |
| 2    | S | 16  | R | 128   | R | 0.5  | S | 0.25 |
| 1    | S | 0.5 | S | 64    | R | 1    | S | 0.5  |
| 4    | S | 16  | R | 64    | R | 0.5  | S | 0.25 |
| 1    | S | 32  | R | 128   | R | 1    | S | 1    |
| 1    | S | 32  | R | 128   | R | >128 | R | 1    |
| >128 | R | 256 | R | 8     | R | 0.5  | S | 1    |
| 1    | S | 0.5 | S | 0.06  | S | 1    | S | 0.5  |
| 2    | S | 1   | S | 0.5   | S | 0.5  | S | 1    |
| 2    | S | 0.5 | S | 0.25  | S | 0.5  | S | 0.5  |
| >128 | R | 256 | R | 16    | R | 1    | S | 1    |
| 2    | S | 1   | S | 32    | R | 1    | S | 8    |
| 2    | S | 0.5 | S | 32    | R | 1    | S | 0.25 |
| 16   | S | 256 | R | 2     | I | 1    | S | 1    |
| 1    | S | 64  | R | 4     | R | 1    | S | 0.5  |
| 2    | S | 4   | S | 2     | I | >128 | R | 1    |
| >128 | R | 256 | R | 128   | R | 1    | S | 1    |

|      |   |     |   |       |   |      |   |      |
|------|---|-----|---|-------|---|------|---|------|
| 1    | S | 1   | S | 0.06  | S | 1    | S | 1    |
| >128 | R | 256 | R | 128   | R | 1    | S | 1    |
| 2    | S | 1   | S | >128  | R | 1    | S | 1    |
| >128 | R | 256 | R | 128   | R | 1    | S | 1    |
| >128 | R | 256 | R | 128   | R | 1    | S | 1    |
| >128 | R | 0.5 | S | >128  | R | 1    | S | 1    |
| 1    | S | 16  | R | 128   | R | 1    | S | 1    |
| 1    | S | 0.5 | S | 128   | R | 1    | S | 1    |
| 2    | S | 1   | S | 0.06  | S | 1    | S | 0.25 |
| 2    | S | 0.5 | S | 128   | R | 32   | R | 1    |
| >128 | R | 256 | R | >128  | R | 1    | S | 1    |
| 4    | S | 1   | S | 64    | R | 0.5  | S | 0.25 |
| 2    | S | 256 | R | <0.03 | S | 0.5  | S | 0.25 |
| 2    | S | 16  | R | 0.25  | S | 0.5  | S | 1    |
| 1    | S | 1   | S | 16    | R | 1    | S | 1    |
| 2    | S | 16  | R | >128  | R | 0.5  | S | 1    |
| >128 | R | 256 | R | >128  | R | 16   | R | 1    |
| 16   | S | 1   | S | 0.125 | S | >128 | R | 1    |
| 1    | S | 0.5 | S | 2     | I | 0.5  | S | 0.5  |
| 1    | S | 0.5 | S | 0.5   | S | 0.5  | S | 1    |
| 1    | S | 16  | R | 1     | S | 0.25 | S | 1    |
| 1    | S | 0.5 | S | 4     | R | 0.5  | S | 0.5  |
| 2    | S | 1   | S | 4     | R | 0.5  | S | 1    |
| 4    | S | 0.5 | S | 128   | R | 0.5  | S | 1    |
| 1    | S | 0.5 | S | 0.5   | S | 0.5  | S | 0.5  |
| 2    | S | 1   | S | >128  | R | 0.5  | S | 1    |
| >128 | R | 16  | R | 1     | S | 0.5  | S | 1    |
| 2    | S | 0.5 | S | 64    | R | 0.5  | S | 1    |
| 1    | S | 16  | R | 64    | R | 0.5  | S | 1    |
| 1    | S | 32  | R | 128   | R | 0.5  | S | 1    |
| 1    | S | 64  | R | 128   | R | 0.5  | S | 1    |
| 1    | S | 32  | R | 128   | R | 0.5  | S | 1    |
| 1    | S | 0.5 | S | 128   | R | 0.5  | S | 1    |
| 1    | S | 64  | R | 128   | R | 128  | R | 1    |
| 1    | S | 32  | R | 128   | R | 0.5  | S | 1    |
| 4    | S | 16  | R | 8     | R | >128 | R | 0.5  |
| 2    | S | 128 | R | 0.5   | S | 0.5  | S | 0.25 |
| 1    | S | 16  | R | 1     | S | 0.5  | S | 1    |
| 8    | S | 2   | S | 8     | R | 0.5  | S | 1    |
| 1    | S | 1   | S | 8     | R | 0.5  | S | 16   |
| >128 | R | 256 | R | 128   | R | 0.5  | S | 1    |
| 1    | S | 64  | R | 128   | R | 0.5  | S | 1    |
| 1    | S | 0.5 | S | 0.5   | S | 0.5  | S | 1    |
| 2    | S | 128 | R | 64    | R | 0.5  | S | 0.25 |
| 8    | S | 8   | I | 128   | R | 0.5  | S | 2    |
| 2    | S | 1   | S | 2     | I | 1    | S | 0.5  |

|      |   |      |   |       |   |      |   |      |
|------|---|------|---|-------|---|------|---|------|
| 1    | S | 16   | R | 128   | R | 0.5  | S | 1    |
| 1    | S | 16   | R | 64    | R | 0.5  | S | 0.5  |
| 0.5  | S | 32   | R | 128   | R | 0.5  | S | 1    |
| 2    | S | 1    | S | 0.06  | S | 0.5  | S | 0.5  |
| 2    | S | 16   | R | 0.5   | S | 0.5  | S | 0.25 |
| 1    | S | 16   | R | 128   | R | 0.5  | S | 0.5  |
| 1    | S | 1    | S | 2     | I | 1    | S | 1    |
| 1    | S | 128  | R | >128  | R | 2    | S | 1    |
| 1    | S | 2    | S | 2     | I | 0.5  | S | 0.5  |
| 1    | S | 16   | R | 32    | R | 1    | S | 0.5  |
| 1    | S | 32   | R | 128   | R | 0.5  | S | 1    |
| 1    | S | 1    | S | 0.25  | S | 0.5  | S | 8    |
| 2    | S | 4    | S | 128   | R | >128 | R | 1    |
| 8    | S | 64   | R | 32    | R | 0.5  | S | 0.5  |
| 2    | S | 1    | S | 2     | I | 0.5  | S | 0.5  |
| 1    | S | 1    | S | 0.25  | S | 1    | S | 0.5  |
| 1    | S | 32   | R | 128   | R | 0.5  | S | 1    |
| 1    | S | 64   | R | 128   | R | 0.5  | S | 1    |
| 0.5  | S | 16   | R | 128   | R | 0.5  | S | 0.5  |
| 2    | S | 1    | S | 0.06  | S | 0.5  | S | 0.5  |
| >128 | R | 256  | R | 128   | R | 0.5  | S | 1    |
| 16   | S | 32   | R | 128   | R | 0.5  | S | 1    |
| 4    | S | 256  | R | 0.06  | S | 1    | S | 0.25 |
| 2    | S | 1    | S | 0.06  | S | 0.5  | S | 0.5  |
| 2    | S | 1    | S | 0.25  | S | 1    | S | 0.25 |
| 2    | S | 0.5  | S | 0.25  | S | 0.5  | S | 0.5  |
| 1    | S | 0.5  | S | <0.03 | S | 1    | S | 1    |
| 1    | S | 1    | S | 0.125 | S | 1    | S | 4    |
| 1    | S | 32   | R | >128  | R | 0.5  | S | 1    |
| 2    | S | 1    | S | 16    | R | 1    | S | 0.5  |
| 2    | S | 0.5  | S | 128   | R | 1    | S | 1    |
| >128 | R | 256  | R | 64    | R | 1    | S | 0.5  |
| 2    | S | 1    | S | 0.25  | S | 0.5  | S | 4    |
| 2    | S | 16   | R | 4     | R | 0.5  | S | 1    |
| >128 | R | 256  | R | 128   | R | 1    | S | 1    |
| 8    | S | 8    | I | 64    | R | 1    | S | 1    |
| 2    | S | 1    | S | 4     | R | 0.5  | S | 1    |
| 1    | S | 0.25 | S | 0.06  | S | 64   | R | 0.5  |
| 16   | S | 128  | R | 0.5   | S | 0.5  | S | 0.5  |
| 8    | S | 0.5  | S | 0.06  | S | >128 | R | 0.5  |
| 2    | S | 0.5  | S | <0.03 | S | 64   | R | 0.5  |
| 0.5  | S | 0.25 | S | 0.125 | S | 0.5  | S | 1    |
| 1    | S | 0.5  | S | 0.5   | S | 0.5  | S | 0.5  |
| 1    | S | 0.5  | S | 1     | S | 1    | S | 0.5  |
| 1    | S | 0.5  | S | 1     | S | 1    | S | 0.5  |
| 1    | S | 0.5  | S | 0.125 | S | 64   | R | 0.5  |

|      |   |      |   |       |   |     |   |      |
|------|---|------|---|-------|---|-----|---|------|
| 2    | S | 1    | S | 1     | S | 0.5 | S | 0.5  |
| 2    | S | 1    | S | >128  | R | 0.5 | S | 0.5  |
| 1    | S | 0.25 | S | 1     | S | 0.5 | S | 0.5  |
| >128 | R | 256  | R | 128   | R | 0.5 | S | 1    |
| 1    | S | 0.5  | S | 64    | R | 0.5 | S | 1    |
| 0.5  | S | 1    | S | 64    | R | 0.5 | S | 1    |
| 1    | S | 16   | R | 8     | R | 0.5 | S | 1    |
| 1    | S | 16   | R | 1     | S | 1   | S | 1    |
| 4    | S | 128  | R | 4     | R | 0.5 | S | 1    |
| 4    | S | 2    | S | <0.03 | S | 0.5 | S | 0.5  |
| 2    | S | 1    | S | 0.06  | S | 0.5 | S | 0.5  |
| 1    | S | 0.5  | S | 0.06  | S | 0.5 | S | 1    |
| 4    | S | 1    | S | 8     | R | 0.5 | S | 1    |
| 2    | S | 0.5  | S | <0.03 | S | 0.5 | S | 1    |
| 1    | S | 0.5  | S | 0.06  | S | 0.5 | S | 1    |
| 2    | S | 0.5  | S | <0.03 | S | 0.5 | S | 1    |
| 1    | S | 0.25 | S | 0.06  | S | 1   | S | 0.5  |
| 0.5  | S | 0.25 | S | 0.5   | S | 0.5 | S | 0.5  |
| 1    | S | 1    | S | 16    | R | 1   | S | 2    |
| 8    | S | 1    | S | <0.03 | S | 1   | S | 0.5  |
| 2    | S | 1    | S | 64    | R | 0.5 | S | 0.5  |
| 1    | S | 128  | R | 128   | R | 0.5 | S | 1    |
| 1    | S | 0.5  | S | 32    | R | 1   | S | 1    |
| >128 | R | 256  | R | 128   | R | 1   | S | 1    |
| 2    | S | 0.5  | S | 128   | R | 1   | S | 1    |
| 0.5  | S | 1    | S | 16    | R | 1   | S | 4    |
| 1    | S | 1    | S | 4     | R | 1   | S | 1    |
| 1    | S | 64   | R | 0.5   | S | 0.5 | S | 1    |
| 1    | S | 64   | R | 1     | S | 1   | S | 1    |
| 1    | S | 64   | R | 128   | R | 1   | S | 1    |
| 2    | S | 1    | S | >128  | R | 0.5 | S | 1    |
| 2    | S | 1    | S | >128  | R | 1   | S | 1    |
| 2    | S | 1    | S | 1     | S | 1   | S | 0.5  |
| 1    | S | 1    | S | 0.125 | S | 2   | S | 4    |
| 1    | S | 0.5  | S | 0.06  | S | 1   | S | 1    |
| 1    | S | 0.5  | S | 0.06  | S | 1   | S | 0.5  |
| 8    | S | 16   | R | 8     | R | 0.5 | S | 16   |
| 2    | S | 1    | S | 128   | R | 0.5 | S | 0.5  |
| 2    | S | 1    | S | 64    | R | 1   | S | 0.5  |
| 2    | S | 0.5  | S | 32    | R | 0.5 | S | 0.25 |
| >128 | R | 256  | R | 128   | R | 1   | S | 1    |
| 8    | S | 1    | S | >128  | R | 0.5 | S | 1    |
| 1    | S | 0.5  | S | 128   | R | 0.5 | S | 1    |
| 1    | S | 0.5  | S | 128   | R | 0.5 | S | 1    |
| 1    | S | 0.5  | S | 64    | R | 1   | S | 0.5  |
| 8    | S | 16   | R | >128  | R | 0.5 | S | 1    |



|      |   |      |   |       |   |      |   |      |
|------|---|------|---|-------|---|------|---|------|
| >128 | R | 256  | R | 64    | R | 0.5  | S | 1    |
| >128 | R | 256  | R | 32    | R | 32   | R | 1    |
| 2    | S | 16   | R | 8     | R | >128 | R | 1    |
| 1    | S | 0.5  | S | 0.5   | S | 0.5  | S | 0.25 |
| 64   | R | 0.5  | S | 0.5   | S | >128 | R | 0.5  |
| 1    | S | 0.5  | S | 0.5   | S | 0.5  | S | 0.5  |
| 1    | S | 1    | S | 0.25  | S | 0.5  | S | 1    |
| 2    | S | 1    | S | 0.06  | S | 0.5  | S | 0.5  |
| 1    | S | 0.5  | S | 0.125 | S | 0.5  | S | 1    |
| 2    | S | 0.5  | S | <0.03 | S | 1    | S | 0.5  |
| 2    | S | 0.5  | S | 1     | S | 0.5  | S | 1    |
| 1    | S | 0.25 | S | 0.06  | S | 2    | S | 1    |
| 0.5  | S | 0.5  | S | 0.06  | S | 1    | S | 1    |
| 1    | S | 0.5  | S | <0.03 | S | 0.5  | S | 0.5  |
| 0.5  | S | 1    | S | 0.5   | S | 0.5  | S | 0.25 |
| 2    | S | 1    | S | 2     | I | 0.5  | S | 2    |
| 16   | S | 256  | R | 128   | R | 0.5  | S | 0.25 |
| 8    | S | 1    | S | >128  | R | 0.5  | S | 0.5  |
| 1    | S | 16   | R | >128  | R | 0.5  | S | 1    |
| >128 | R | 256  | R | 64    | R | 0.5  | S | 1    |
| >128 | R | 256  | R | >128  | R | 0.5  | S | 1    |
| 1    | S | 0.25 | S | 64    | R | 32   | R | 1    |
| 2    | S | 1    | S | >128  | R | 0.5  | S | 1    |
| >128 | R | 256  | R | 128   | R | 0.5  | S | 1    |
| 2    | S | 16   | R | 128   | R | 0.5  | S | 1    |
| 2    | S | 128  | R | 1     | S | 0.5  | S | 0.5  |
| 1    | S | 16   | R | 0.5   | S | 0.5  | S | 0.5  |
| >128 | R | 256  | R | 64    | R | 0.5  | S | 1    |
| 2    | S | 4    | S | 1     | S | 0.5  | S | 0.5  |
| 1    | S | 64   | R | 1     | S | 1    | S | 1    |
| 1    | S | 1    | S | 1     | S | 0.5  | S | 0.5  |
| 4    | S | 128  | R | 2     | I | 1    | S | 1    |
| 1    | S | 1    | S | 8     | R | 0.5  | S | 1    |
| 2    | S | 0.5  | S | 0.5   | S | >128 | R | 0.5  |
| 2    | S | 8    | I | 64    | R | 0.5  | S | 2    |
| 2    | S | 0.5  | S | 0.06  | S | 0.5  | S | 1    |
| 4    | S | 1    | S | 64    | R | 0.5  | S | 0.5  |
| 4    | S | 128  | R | >128  | R | 0.5  | S | 0.5  |
| 2    | S | 0.5  | S | 1     | S | 0.5  | S | 1    |
| 4    | S | 16   | R | 1     | S | 0.5  | S | 1    |
| 2    | S | 8    | I | >128  | R | 0.5  | S | 1    |
| 2    | S | 0.5  | S | 2     | I | 0.5  | S | 0.5  |
| 2    | S | 0.5  | S | 2     | I | 0.5  | S | 1    |
| 2    | S | 64   | R | 32    | R | 0.5  | S | 1    |
| 2    | S | 0.5  | S | 128   | R | 0.5  | S | 1    |
| 4    | S | 0.5  | S | 0.125 | S | 128  | R | 1    |

|      |   |      |   |       |   |      |   |      |
|------|---|------|---|-------|---|------|---|------|
| 2    | S | 0.5  | S | 0.06  | S | 0.5  | S | 1    |
| 2    | S | 0.5  | S | <0.03 | S | 1    | S | 0.5  |
| 1    | S | 0.25 | S | 0.06  | S | >128 | R | 1    |
| 1    | S | 0.5  | S | <0.03 | S | 0.5  | S | 1    |
| 2    | S | 64   | R | 0.5   | S | >128 | R | 0.5  |
| 2    | S | 64   | R | 32    | R | 0.5  | S | 1    |
| 2    | S | 0.5  | S | 128   | R | 0.5  | S | 1    |
| 1    | S | 0.5  | S | <0.03 | S | 128  | R | 1    |
| 2    | S | 0.5  | S | 2     | I | 1    | S | 1    |
| >128 | R | 256  | R | 128   | R | 1    | S | 1    |
| >128 | R | 256  | R | 64    | R | 0.5  | S | 1    |
| 4    | S | 0.5  | S | 128   | R | 0.5  | S | 1    |
| 1    | S | 32   | R | 128   | R | 0.5  | S | 1    |
| 2    | S | 0.5  | S | 0.06  | S | >128 | R | 1    |
| 4    | S | 16   | R | 16    | R | 1    | S | 1    |
| 4    | S | 128  | R | 32    | R | 1    | S | 1    |
| 2    | S | 0.5  | S | 0.06  | S | 1    | S | 0.5  |
| 8    | S | 0.5  | S | 0.25  | S | 1    | S | 0.5  |
| 2    | S | 1    | S | 128   | R | 0.5  | S | 0.5  |
| 1    | S | 2    | S | 1     | S | 1    | S | 1    |
| 4    | S | 256  | R | 8     | R | 0.5  | S | 0.25 |
| 32   | I | 2    | S | 128   | R | 0.5  | S | 1    |
| 1    | S | 0.25 | S | 0.125 | S | 16   | R | 1    |
| 2    | S | 0.5  | S | 0.06  | S | 0.5  | S | 1    |
| 2    | S | 0.25 | S | 0.125 | S | >128 | R | 1    |
| 1    | S | 64   | R | 128   | R | 2    | S | 1    |
| 1    | S | 128  | R | 2     | I | 1    | S | 1    |
| 2    | S | 0.5  | S | <0.03 | S | 0.5  | S | 0.5  |
| 1    | S | 32   | R | 1     | S | 0.5  | S | 1    |
| >128 | R | 32   | R | 128   | R | 0.5  | S | 1    |
| 2    | S | 256  | R | 8     | R | 0.5  | S | 0.06 |
| 4    | S | 256  | R | 32    | R | 0.5  | S | 0.25 |
| 1    | S | 0.5  | S | 128   | R | 0.5  | S | 1    |
| >128 | R | 256  | R | 128   | R | 0.5  | S | 1    |
| >128 | R | 256  | R | 128   | R | 0.5  | S | 1    |
| >128 | R | 256  | R | 128   | R | 0.5  | S | 1    |
| 2    | S | 64   | R | 64    | R | 1    | S | 0.25 |
| 8    | S | 0.5  | S | >128  | R | 0.5  | S | 1    |
| 2    | S | 0.25 | S | >128  | R | 0.5  | S | 1    |
| >128 | R | 256  | R | 128   | R | 0.5  | S | 1    |
| >128 | R | 256  | R | 128   | R | 0.5  | S | 1    |
| 4    | S | 0.5  | S | 128   | R | 0.5  | S | 1    |
| 4    | S | 2    | S | 0.5   | S | 0.5  | S | 0.25 |
| 1    | S | 1    | S | 128   | R | 0.5  | S | 1    |
| >128 | R | 256  | R | 32    | R | 0.5  | S | 1    |
| >128 | R | 256  | R | 128   | R | 0.5  | S | 0.5  |

|      |   |      |   |       |   |      |   |      |
|------|---|------|---|-------|---|------|---|------|
| >128 | R | 256  | R | 32    | R | 0.5  | S | 1    |
| 8    | S | 0.25 | S | 128   | R | 0.5  | S | 1    |
| 1    | S | 0.5  | S | 128   | R | 0.5  | S | 1    |
| 1    | S | 0.25 | S | 0.06  | S | 0.5  | S | 0.5  |
| 4    | S | 2    | S | 4     | R | 0.5  | S | 0.5  |
| 2    | S | 256  | R | 32    | R | 0.5  | S | 0.25 |
| 2    | S | 2    | S | 128   | R | 0.5  | S | 4    |
| 2    | S | 256  | R | 32    | R | 0.5  | S | 0.5  |
| >128 | R | 256  | R | 32    | R | 1    | S | 1    |
| 1    | S | 0.5  | S | 128   | R | 0.5  | S | 1    |
| 1    | S | 0.5  | S | 128   | R | 0.5  | S | 1    |
| 1    | S | 0.5  | S | 1     | S | 0.5  | S | 0.5  |
| >128 | R | 256  | R | 32    | R | 0.5  | S | 1    |
| 1    | S | 64   | R | 128   | R | 0.5  | S | 1    |
| 2    | S | 0.5  | S | 128   | R | 0.5  | S | 1    |
| >128 | R | 0.5  | S | >128  | R | 0.5  | S | 1    |
| >128 | R | 256  | R | 16    | R | 0.25 | S | 0.5  |
| 2    | S | 8    | I | 1     | S | 0.5  | S | 1    |
| >128 | R | 256  | R | 0.5   | S | 0.5  | S | 1    |
| >128 | R | 16   | R | >128  | R | 1    | S | 0.5  |
| >128 | R | 256  | R | >128  | R | 0.5  | S | 1    |
| 1    | S | 16   | R | >128  | R | 4    | R | 8    |
| 4    | S | 0.5  | S | 128   | R | 0.5  | S | 1    |
| >128 | R | 16   | R | 128   | R | 0.5  | S | 8    |
| 1    | S | 1    | S | 64    | R | 32   | R | 0.5  |
| 1    | S | 32   | R | 128   | R | 0.5  | S | 1    |
| 2    | S | 0.5  | S | 128   | R | 0.5  | S | 1    |
| >128 | R | 256  | R | 32    | R | 0.5  | S | 1    |
| 4    | S | 1    | S | <0.03 | S | 0.5  | S | 1    |
| 1    | S | 0.5  | S | 16    | R | 0.5  | S | 0.5  |
| >128 | R | 256  | R | 128   | R | 0.5  | S | 0.25 |
| 1    | S | 16   | R | 16    | R | 0.5  | S | 1    |
| >128 | R | 256  | R | 16    | R | 0.5  | S | 1    |
| 16   | S | 2    | S | 4     | R | 0.5  | S | 1    |
| >128 | R | 128  | R | 128   | R | 0.5  | S | 1    |
| 1    | S | 0.5  | S | 128   | R | 0.5  | S | 1    |
| 8    | S | 1    | S | 128   | R | 0.5  | S | 1    |
| >128 | R | 256  | R | 16    | R | 0.5  | S | 1    |
| 2    | S | 1    | S | >128  | R | 0.5  | S | 1    |
| 2    | S | 16   | R | >128  | R | 0.5  | S | 1    |
| 1    | S | 64   | R | >128  | R | 0.5  | S | 1    |
| >128 | R | >256 | R | 32    | R | 0.5  | S | 1    |
| >128 | R | >256 | R | 128   | R | 0.5  | S | 1    |
| 1    | S | 16   | R | 64    | R | 0.5  | S | 1    |
| 1    | S | 0.25 | S | 2     | I | 0.5  | S | 0.5  |
| >128 | R | >256 | R | 128   | R | 0.5  | S | 0.5  |

|      |   |      |   |       |   |      |   |     |
|------|---|------|---|-------|---|------|---|-----|
| 1    | S | 16   | R | 128   | R | 0.5  | S | 1   |
| 1    | S | 0.25 | S | 128   | R | 0.25 | S | 1   |
| 2    | S | 16   | R | >128  | R | 0.5  | S | 0.5 |
| 1    | S | 0.19 | S | 128   | R | 0.5  | S | 1   |
| >128 | R | 16   | R | 32    | R | 0.5  | S | 1   |
| 2    | S | 0.25 | S | 128   | R | 0.5  | S | 1   |
| 1    | S | 0.38 | S | 128   | R | 0.5  | S | 1   |
| >128 | R | >256 | R | 128   | R | 0.5  | S | 1   |
| 1    | S | >256 | R | 128   | R | 0.5  | S | 1   |
| >128 | R | >256 | R | 16    | R | 0.5  | S | 1   |
| 4    | S | 64   | R | 1     | S | 0.5  | S | 1   |
| 4    | S | 64   | R | 1     | S | 0.5  | S | 1   |
| 8    | S | 1    | S | >128  | R | 0.5  | S | 1   |
| 1    | S | 0.75 | S | 0.25  | S | 0.5  | S | 1   |
| 2    | S | 0.75 | S | 128   | R | 0.5  | S | 0.5 |
| >128 | R | >256 | R | 128   | R | 0.5  | S | 0.5 |
| 1    | S | 1    | S | 32    | R | 0.5  | S | 0.5 |
| 2    | S | 0.5  | S | >128  | R | 0.5  | S | 1   |
| 1    | S | 128  | R | 64    | R | 0.5  | S | 1   |
| 1    | S | 4    | S | 16    | R | 0.5  | S | 1   |
| 2    | S | 64   | R | 128   | R | 0.5  | S | 0.5 |
| 2    | S | 64   | R | 16    | R | 1    | S | 4   |
| 1    | S | 32   | R | 128   | R | 0.5  | S | 1   |
| 1    | S | 64   | R | 128   | R | 0.5  | S | 1   |
| 64   | R | 32   | R | >128  | R | 0.5  | S | 1   |
| 4    | S | 1    | S | 2     | I | 0.5  | S | 1   |
| 2    | S | 1    | S | 128   | R | 0.5  | S | 1   |
| 2    | S | 1    | S | 0.125 | S | >128 | R | 1   |
| 1    | S | 0.5  | S | 0.06  | S | 0.5  | S | 1   |
| 2    | S | 1    | S | 128   | R | 0.5  | S | 0.5 |
| 2    | S | 128  | R | 128   | R | 0.5  | S | 1   |
| 1    | S | 128  | R | 128   | R | 2    | S | 1   |
| >128 | R | 256  | R | 128   | R | 0.5  | S | 1   |
| 1    | S | 32   | R | 128   | R | 0.5  | S | 1   |
| >128 | R | 256  | R | 128   | R | 1    | S | 1   |
| 4    | S | 64   | R | 16    | R | 0.5  | S | 1   |
| >128 | R | 0.5  | S | 128   | R | 1    | S | 1   |
| 2    | S | 0.5  | S | 128   | R | 0.5  | S | 1   |
| 2    | S | 0.5  | S | >128  | R | 0.5  | S | 1   |
| 2    | S | 1    | S | 128   | R | 0.5  | S | 1   |
| 2    | S | 256  | R | 128   | R | 0.5  | S | 1   |
| 2    | S | 64   | R | 1     | S | 0.5  | S | 1   |
| >128 | R | 256  | R | 64    | R | 0.5  | S | 1   |
| 8    | S | 16   | R | 32    | R | >128 | R | 1   |
| 2    | S | 0.5  | S | 0.125 | S | 1    | S | 1   |
| 8    | S | 1    | S | 128   | R | 4    | R | 1   |

|      |   |      |   |       |   |      |   |      |
|------|---|------|---|-------|---|------|---|------|
| 1    | S | 0.5  | S | 0.06  | S | 0.5  | S | 0.5  |
| 2    | S | 0.5  | S | 0.5   | S | 0.5  | S | 0.5  |
| >128 | R | 256  | R | 64    | R | 0.5  | S | 1    |
| 2    | S | 1    | S | 1     | S | 0.5  | S | 1    |
| 2    | S | 0.5  | S | 128   | R | 0.5  | S | 1    |
| 4    | S | 8    | I | 128   | R | 0.5  | S | 1    |
| 2    | S | 0.5  | S | 0.06  | S | 0.5  | S | 0.5  |
| >128 | R | 256  | R | 16    | R | 0.5  | S | 1    |
| 2    | S | 0.5  | S | 4     | R | 0.5  | S | 1    |
| 4    | S | 256  | R | 0.5   | S | 0.5  | S | 0.5  |
| 2    | S | 0.5  | S | <0.03 | S | 0.5  | S | 1    |
| 1    | S | 0.5  | S | <0.03 | S | 0.5  | S | 1    |
| 2    | S | 1    | S | 1     | S | 0.5  | S | 1    |
| 1    | S | 0.5  | S | 0.06  | S | 0.5  | S | 1    |
| 1    | S | 0.5  | S | 0.125 | S | >128 | R | 1    |
| 1    | S | 0.5  | S | 0.06  | S | 0.5  | S | 1    |
| 4    | S | 2    | S | 128   | R | 1    | S | 1    |
| 16   | S | 1    | S | >128  | R | 0.5  | S | 1    |
| 2    | S | 1    | S | >128  | R | 0.5  | S | 0.5  |
| 1    | S | 0.5  | S | 128   | R | 0.5  | S | 1    |
| 2    | S | 64   | R | 0.125 | S | 0.5  | S | 1    |
| 16   | S | 2    | S | 32    | R | >128 | R | 1    |
| 8    | S | 1    | S | 0.25  | S | >128 | R | 0.5  |
| >128 | R | 256  | R | 128   | R | 0.5  | S | 1    |
| 1    | S | 0.5  | S | 0.125 | S | 4    | R | 1    |
| 2    | S | 1    | S | 0.125 | S | >128 | R | 0.5  |
| 2    | S | 1    | S | 128   | R | 0.5  | S | 0.5  |
| 4    | S | 1    | S | 128   | R | 0.5  | S | 0.5  |
| >128 | R | 16   | R | >128  | R | 0.5  | S | 0.5  |
| 1    | S | 1    | S | 1     | S | 0.5  | S | 1    |
| 1    | S | 0.5  | S | 0.25  | S | >128 | R | 0.5  |
| 4    | S | 0.5  | S | 0.125 | S | 0.5  | S | 1    |
| 1    | S | 0.5  | S | 0.06  | S | >128 | R | 0.5  |
| 2    | S | 1    | S | 0.06  | S | >128 | R | 0.5  |
| 2    | S | 0.5  | S | <0.03 | S | 0.5  | S | 0.5  |
| 1    | S | 0.5  | S | 0.06  | S | 1    | S | 1    |
| 1    | S | 16   | R | 8     | R | 0.5  | S | 0.5  |
| >128 | R | 16   | R | >128  | R | 0.5  | S | 0.5  |
| >128 | R | 16   | R | 32    | R | >128 | R | 4    |
| >128 | R | 16   | R | >128  | R | 0.5  | S | 2    |
| 1    | S | 0.25 | S | <0.03 | S | 1    | S | 0.5  |
| 1    | S | 1    | S | 16    | R | 0.5  | S | 0.5  |
| 1    | S | 8    | I | 32    | R | 0.5  | S | 0.5  |
| 2    | S | 128  | R | 0.5   | S | 0.5  | S | 0.25 |
| 2    | S | 128  | R | 4     | R | 0.5  | S | 0.5  |
| 1    | S | 0.5  | S | 0.06  | S | 0.5  | S | 0.5  |

|      |   |      |   |       |   |      |   |       |
|------|---|------|---|-------|---|------|---|-------|
| 32   | I | 16   | R | 0.5   | S | 0.5  | S | 1     |
| 1    | S | 0.5  | S | 16    | R | 0.5  | S | 0.5   |
| 2    | S | 0.5  | S | 0.06  | S | 0.5  | S | 0.25  |
| 1    | S | 16   | R | 0.06  | S | 0.5  | S | 1     |
| 1    | S | 1    | S | <0.03 | S | 1    | S | 1     |
| 1    | S | 0.5  | S | 128   | R | 0.5  | S | 1     |
| 16   | S | 128  | R | 1     | S | 0.5  | S | 1     |
| 16   | S | 256  | R | 32    | R | 0.5  | S | 0.5   |
| 1    | S | 0.25 | S | 0.125 | S | 0.5  | S | 1     |
| 1    | S | 256  | R | 8     | R | 0.5  | S | 1     |
| 1    | S | 0.5  | S | 128   | R | 0.5  | S | 1     |
| 16   | S | 16   | R | 64    | R | 0.5  | S | 1     |
| 1    | S | 0.5  | S | 64    | R | 0.5  | S | 1     |
| 2    | S | 0.5  | S | 128   | R | 0.5  | S | 1     |
| >128 | R | 128  | R | >128  | R | 0.5  | S | 8     |
| 1    | S | 0.25 | S | 0.06  | S | 0.5  | S | 1     |
| 1    | S | 0.25 | S | 0.125 | S | 0.5  | S | 1     |
| 16   | S | 64   | R | >128  | R | 0.5  | S | 1     |
| 4    | S | 64   | R | 128   | R | 0.5  | S | 0.25  |
| 1    | S | 16   | R | 0.06  | S | 0.5  | S | 1     |
| 2    | S | 64   | R | 8     | R | 0.5  | S | 1     |
| 2    | S | 1    | S | 0.25  | S | 2    | S | 1     |
| 2    | S | 16   | R | 8     | R | 0.5  | S | 0.5   |
| 2    | S | 128  | R | 128   | R | 0.5  | S | 0.5   |
| 2    | S | 1    | S | 32    | R | 0.5  | S | 0.5   |
| >128 | R | 16   | R | 128   | R | 0.5  | S | 0.5   |
| 8    | S | 256  | R | 64    | R | 0.5  | S | 1     |
| >128 | R | 256  | R | 128   | R | 0.5  | S | 1     |
| 4    | S | 1    | S | 128   | R | 0.5  | S | 0.25  |
| 1    | S | 128  | R | 128   | R | 0.5  | S | 1     |
| 1    | S | 16   | R | 128   | R | 0.5  | S | 0.5   |
| 1    | S | 32   | R | 0.125 | S | 0.5  | S | 0.125 |
| 2    | S | 32   | R | 0.06  | S | 0.5  | S | 0.5   |
| 1    | S | 0.5  | S | 0.125 | S | 0.5  | S | 1     |
| 1    | S | 0.5  | S | 64    | R | 0.5  | S | 1     |
| 1    | S | 16   | R | 2     | I | 0.5  | S | 1     |
| 4    | S | 16   | R | 2     | I | >128 | R | 1     |
| >128 | R | 16   | R | >128  | R | 0.5  | S | 1     |
| 1    | S | 64   | R | 1     | S | 0.5  | S | 1     |
| 2    | S | 0.5  | S | 0.06  | S | 0.5  | S | 0.5   |
| 1    | S | 128  | R | 0.5   | S | 0.5  | S | 0.5   |
| 2    | S | 0.5  | S | 0.06  | S | 0.25 | S | 1     |
| >128 | R | 256  | R | 128   | R | 0.5  | S | 1     |
| 2    | S | 1    | S | 16    | R | 4    | R | 4     |
| 2    | S | 128  | R | 64    | R | 0.5  | S | 0.5   |
| 2    | S | 128  | R | >128  | R | 0.5  | S | 1     |

|      |   |      |   |       |   |      |   |      |
|------|---|------|---|-------|---|------|---|------|
| 1    | S | 128  | R | 32    | R | 1    | S | 0.5  |
| 4    | S | 1    | S | 32    | R | 0.5  | S | 0.25 |
| 2    | S | 16   | R | 8     | R | 32   | R | 2    |
| >128 | R | 256  | R | >128  | R | 0.5  | S | 1    |
| >128 | R | 16   | R | 128   | R | 0.5  | S | 1    |
| >128 | R | 256  | R | 64    | R | 0.5  | S | 1    |
| 1    | S | 16   | R | 0.06  | S | 0.5  | S | 1    |
| 4    | S | 0.25 | S | 128   | R | 0.5  | S | 1    |
| 1    | S | 0.5  | S | 128   | R | 0.5  | S | 1    |
| 2    | S | 16   | R | 8     | R | 0.5  | S | 1    |
| 1    | S | 0.5  | S | 128   | R | 0.5  | S | 1    |
| 2    | S | 0.25 | S | 32    | R | 0.5  | S | 0.5  |
| 2    | S | 0.5  | S | 128   | R | 32   | R | 1    |
| 2    | S | 0.5  | S | 32    | R | 8    | R | 1    |
| 1    | S | 0.5  | S | >128  | R | 0.5  | S | 1    |
| 1    | S | 16   | R | >128  | R | 0.5  | S | 1    |
| 2    | S | 0.5  | S | 0.125 | S | 0.5  | S | 1    |
| 2    | S | 0.25 | S | 128   | R | 0.5  | S | 1    |
| >128 | R | 16   | R | 128   | R | 64   | R | 1    |
| 1    | S | 0.5  | S | 64    | R | 0.5  | S | 4    |
| 1    | S | 0.5  | S | 128   | R | 0.5  | S | 1    |
| 1    | S | 0.5  | S | >128  | R | 0.5  | S | 1    |
| 2    | S | 32   | R | 0.25  | S | 0.5  | S | 1    |
| >128 | R | 1    | S | 0.125 | S | 0.5  | S | 1    |
| >128 | R | 0.5  | S | >128  | R | 0.5  | S | 1    |
| 2    | S | 0.5  | S | 64    | R | 0.5  | S | 4    |
| 1    | S | 256  | R | 128   | R | 0.5  | S | 1    |
| 1    | S | 256  | R | 128   | R | 0.5  | S | 1    |
| 2    | S | 1    | S | 64    | R | 0.5  | S | 1    |
| >128 | R | 1    | S | 128   | R | 0.5  | S | 1    |
| 4    | S | 0.5  | S | 32    | R | 0.5  | S | 0.25 |
| 1    | S | 256  | R | 2     | I | 0.5  | S | 1    |
| 1    | S | 0.5  | S | >128  | R | 0.5  | S | 1    |
| >128 | R | 256  | R | 32    | R | 0.5  | S | 1    |
| >128 | R | 16   | R | 64    | R | 0.25 | S | 1    |
| 1    | S | 0.5  | S | 128   | R | 0.5  | S | 1    |
| 1    | S | 1    | S | >128  | R | 0.5  | S | 8    |
| 1    | S | 0.5  | S | 0.06  | S | 0.5  | S | 1    |
| 1    | S | 2    | S | 16    | R | 0.5  | S | 1    |
| 1    | S | 0.5  | S | <0.03 | R | 0.5  | S | 1    |
| 1    | S | 256  | R | 16    | R | 0.5  | S | 4    |
| 1    | S | 16   | R | 128   | R | 0.5  | S | 0.5  |
| >128 | R | 16   | R | >128  | R | 0.5  | S | 1    |
| 1    | S | 0.5  | S | 128   | R | 0.5  | S | 1    |
| >128 | R | 256  | R | >128  | R | 0.5  | S | 1    |
| 128  | R | 256  | R | >128  | R | 0.25 | S | 0.25 |

|      |   |      |   |       |   |      |   |      |
|------|---|------|---|-------|---|------|---|------|
| 1    | S | 2    | S | 128   | R | 0.5  | S | 4    |
| 1    | S | 0.5  | S | 128   | R | 0.5  | S | 1    |
| 2    | S | 2    | S | 128   | R | 0.5  | S | 4    |
| 2    | S | 1    | S | 128   | R | 0.25 | S | 0.25 |
| 1    | S | 0.5  | S | 128   | R | 0.5  | S | 1    |
| 2    | S | 0.5  | S | 0.06  | S | 0.25 | S | 0.25 |
| 1    | S | 1    | S | >128  | R | 0.5  | S | 1    |
| 4    | S | 1    | S | 0.5   | S | 0.25 | S | 1    |
| 1    | S | 0.25 | S | 0.06  | S | 0.5  | S | 0.5  |
| 8    | S | 32   | R | >128  | R | 0.5  | S | 0.5  |
| >128 | R | 256  | R | >128  | R | 0.5  | S | 1    |
| 2    | S | 128  | R | 1     | S | 0.5  | S | 0.5  |
| 16   | S | 256  | R | 64    | R | 0.5  | S | 1    |
| 2    | S | 256  | R | 2     | I | 0.5  | S | 0.5  |
| >128 | R | 256  | R | >128  | R | 0.5  | S | 0.5  |
| 1    | S | 0.25 | S | 128   | R | 0.5  | S | 1    |
| 1    | S | 0.5  | S | 0.06  | S | 1    | S | 0.5  |
| 1    | S | 2    | S | 8     | R | 0.5  | S | 1    |
| 1    | S | 16   | R | 128   | R | 0.5  | S | 0.5  |
| 1    | S | 8    | I | >128  | R | 0.5  | S | 1    |
| 2    | S | 16   | R | 32    | R | 0.5  | S | 8    |
| 1    | S | 0.5  | S | 128   | R | 0.5  | S | 1    |
| 4    | S | 1    | S | 1     | S | 128  | R | 0.5  |
| >128 | R | 16   | R | >128  | R | 0.5  | S | 0.5  |
| 4    | S | 1    | S | 128   | R | 0.5  | S | 1    |
| 2    | S | 0.5  | S | 8     | R | 0.5  | S | 0.06 |
| 2    | S | 0.5  | S | 0.06  | S | 1    | S | 0.5  |
| 1    | S | 1    | S | 4     | R | >128 | R | 1    |
| 8    | S | 128  | R | >128  | R | 32   | R | 1    |
| 2    | S | 1    | S | 64    | R | 0.5  | S | 0.25 |
| 2    | S | 64   | R | 128   | R | 0.5  | S | 1    |
| >128 | R | 64   | R | 128   | R | 0.5  | S | 1    |
| 1    | S | 8    | I | >128  | R | 0.5  | S | 8    |
| 1    | S | 16   | R | 1     | S | 0.5  | S | 2    |
| 2    | S | 16   | R | >128  | R | 0.5  | S | 1    |
| >128 | R | 256  | R | 128   | R | 0.5  | S | 1    |
| >128 | R | 256  | R | 128   | R | 0.5  | S | 1    |
| 1    | S | 0.5  | S | >128  | R | 0.5  | S | 1    |
| 2    | S | 1    | S | 4     | R | 0.5  | S | 2    |
| >128 | R | 256  | R | 128   | R | 0.5  | S | 1    |
| 4    | S | 16   | R | 16    | R | 1    | S | 0.5  |
| >128 | R | 256  | R | 128   | R | 0.5  | S | 1    |
| >128 | R | 256  | R | 128   | R | 0.5  | S | 1    |
| 1    | S | 1    | S | 4     | R | 0.5  | S | 8    |
| 1    | S | 0.5  | S | <0.03 | S | 0.25 | S | 0.5  |
| 8    | S | 0.5  | S | <0.03 | S | 0.5  | S | 0.5  |



|      |   |     |   |       |   |      |   |       |
|------|---|-----|---|-------|---|------|---|-------|
| 2    | S | 1   | S | 0.06  | S | 16   | R | 0.5   |
| 1    | S | 1   | S | 0.06  | S | 128  | R | 0.5   |
| 2    | S | 256 | R | 1     | S | 0.5  | S | 0.5   |
| 8    | S | 2   | S | >128  | R | 0.5  | S | 0.5   |
| >128 | R | 256 | R | 128   | R | 0.5  | S | 1     |
| 32   | I | 16  | R | 128   | R | 0.5  | S | 0.5   |
| 1    | S | 1   | S | 1     | S | 1    | S | 2     |
| 2    | S | 1   | S | 1     | S | 0.5  | S | 1     |
| 2    | S | 1   | S | >128  | R | 0.5  | S | 1     |
| 1    | S | 16  | R | 1     | S | 1    | S | 1     |
| 1    | S | 1   | S | >128  | R | 64   | R | 16    |
| 2    | S | 1   | S | 0.125 | S | 0.5  | S | 4     |
| 2    | S | 1   | S | 16    | R | 0.5  | S | 8     |
| 1    | S | 1   | S | 0.06  | S | 0.5  | S | 0.25  |
| 2    | S | 256 | R | <0.03 | S | 0.5  | S | 0.125 |
| 1    | S | 1   | S | 0.25  | S | 0.5  | S | 0.25  |
| 1    | S | 2   | S | 0.06  | S | 0.5  | S | 0.5   |
| 16   | S | 0.5 | S | 8     | R | 0.25 | S | 0.5   |
| 4    | S | 256 | R | 0.5   | S | 0.5  | S | 0.25  |
| 8    | S | 128 | R | >128  | R | 0.5  | S | 0.5   |
| 2    | S | 16  | R | 4     | R | 0.5  | S | 0.25  |
| 1    | S | 1   | S | 8     | R | 0.5  | S | 1     |
| 2    | S | 1   | S | 1     | S | 0.5  | S | 0.5   |
| 1    | S | 16  | R | >128  | R | 0.5  | S | 0.5   |
| >128 | R | 128 | R | 128   | R | 0.5  | S | 1     |
| 1    | S | 1   | S | >128  | R | 0.5  | S | 0.5   |
| 2    | S | 1   | S | 16    | R | 0.25 | S | 0.25  |
| 1    | S | 0.5 | S | 0.06  | S | 0.5  | S | 0.5   |
| 1    | S | 1   | S | 0.25  | S | 0.5  | S | 4     |
| 4    | S | 256 | R | 16    | R | 0.25 | S | 0.5   |
| 1    | S | 64  | R | 128   | R | 0.5  | S | 1     |
| >128 | R | 128 | R | 128   | R | 0.5  | S | 1     |
| 1    | S | 32  | R | >128  | R | 0.25 | S | 1     |
| 2    | S | 128 | R | 32    | R | 0.25 | S | 1     |
| 8    | S | 16  | R | >128  | R | 0.25 | S | 1     |
| >128 | R | 16  | R | 64    | R | 0.25 | S | 0.5   |
| 1    | S | 0.5 | S | 128   | R | 1    | S | 1     |
| 1    | S | 1   | S | 128   | R | 64   | R | 1     |
| 1    | S | 32  | R | 128   | R | 0.5  | S | 1     |
| 2    | S | 64  | R | 1     | S | 0.25 | S | 0.5   |
| >128 | R | 16  | R | >128  | R | 0.25 | S | 1     |
| 2    | S | 16  | R | 0.5   | S | 0.25 | S | 1     |
| 1    | S | 128 | R | <0.03 | S | 0.25 | S | 0.125 |
| 2    | S | 1   | S | 8     | R | 0.25 | S | 1     |
| 2    | S | 1   | S | <0.03 | S | 0.5  | S | 0.5   |
| 2    | S | 64  | R | 0.125 | S | 0.5  | S | 1     |

|      |   |      |   |       |   |      |   |      |
|------|---|------|---|-------|---|------|---|------|
| 1    | S | 0.5  | S | <0.03 | S | 0.5  | S | 0.5  |
| 1    | S | 0.5  | S | 0.06  | S | 0.5  | S | 1    |
| 1    | S | 0.5  | S | 0.125 | S | 0.5  | S | 1    |
| 0.5  | S | 0.5  | S | 0.25  | S | 0.5  | S | 1    |
| 2    | S | 2    | S | 0.125 | S | >128 | R | 1    |
| >128 | R | 16   | R | 128   | R | 0.5  | S | 1    |
| 2    | S | 0.5  | S | >128  | R | 0.25 | S | 0.5  |
| 2    | S | 0.5  | S | 32    | R | 0.5  | S | 0.5  |
| 16   | S | 4    | S | >128  | R | 0.5  | S | 1    |
| >128 | R | 16   | R | 128   | R | 0.5  | S | 0.5  |
| 8    | S | 128  | R | 1     | S | 0.5  | S | 1    |
| 1    | S | 256  | R | >128  | R | 0.5  | S | 0.5  |
| 2    | S | 8    | I | 128   | R | 0.5  | S | 1    |
| 2    | S | 16   | R | 64    | R | 0.5  | S | 16   |
| >128 | R | 0.5  | S | 128   | R | 0.5  | S | 1    |
| >128 | R | 64   | R | 128   | R | 0.5  | S | 1    |
| 2    | S | 1    | S | 64    | R | 0.5  | S | 0.5  |
| 2    | S | 256  | R | 64    | R | 0.5  | S | 0.5  |
| 1    | S | 256  | R | 1     | S | 0.5  | S | 1    |
| >128 | R | 128  | R | 128   | R | 0.5  | S | 1    |
| 4    | S | 0.5  | S | 0.125 | S | 0.5  | S | 1    |
| 2    | S | 1    | S | 16    | R | 0.5  | S | 8    |
| 1    | S | 0.25 | S | 0.06  | S | 1    | S | 1    |
| 1    | S | 0.25 | S | 64    | R | 0.5  | S | 0.5  |
| 2    | S | 64   | R | 128   | R | 0.5  | S | 0.25 |
| 2    | S | 4    | S | >128  | R | 0.5  | S | 0.25 |
| 2    | S | 0.5  | S | >128  | R | 0.5  | S | 1    |
| 2    | S | 16   | R | 128   | R | 0.5  | S | 1    |
| >128 | R | 256  | R | 128   | R | 0.5  | S | 1    |
| 1    | S | 0.25 | S | 128   | R | 0.5  | S | 1    |
| 16   | S | 1    | S | 8     | R | 0.5  | S | 1    |
| 1    | S | 1    | S | 0.5   | S | 1    | S | 1    |
| >128 | R | 256  | R | >128  | R | 0.5  | S | 1    |
| 1    | S | 16   | R | 64    | R | 0.5  | S | 1    |
| 8    | S | 2    | S | 0.5   | S | >128 | R | 1    |
| 4    | S | 2    | S | 0.25  | S | >128 | R | 1    |
| >128 | R | 256  | R | 8     | R | 0.5  | S | 1    |
| 2    | S | 0.5  | S | <0.03 | S | 0.5  | S | 1    |
| 2    | S | 0.5  | S | 0.06  | S | 0.25 | S | 1    |
| 2    | S | 0.5  | S | 0.06  | S | >128 | R | 1    |
| 2    | S | 1    | S | 1     | S | 0.25 | S | 1    |
| 2    | S | 0.5  | S | 64    | R | 0.25 | S | 0.25 |
| 4    | S | 8    | I | 2     | I | 0.5  | S | 0.5  |
| 4    | S | 16   | R | 64    | R | 0.5  | S | 4    |
| >128 | R | 256  | R | 128   | R | 0.5  | S | 1    |
| 1    | S | 0.25 | S | 128   | R | 0.5  | S | 1    |

|      |   |      |   |       |   |      |   |      |
|------|---|------|---|-------|---|------|---|------|
| >128 | R | 256  | R | 128   | R | 0.5  | S | 1    |
| 2    | S | 16   | R | >128  | R | 1    | S | 1    |
| >128 | R | 256  | R | 128   | R | 0.5  | S | 1    |
| >128 | R | 256  | R | 128   | R | 0.5  | S | 1    |
| 4    | S | 1    | S | >128  | R | 0.5  | S | 2    |
| 2    | S | 1    | S | 16    | R | 0.5  | S | 8    |
| 1    | S | 0.5  | S | 0.06  | S | 0.5  | S | 1    |
| 2    | S | 0.25 | S | 0.06  | S | 0.5  | S | 0.5  |
| 2    | S | 1    | S | 128   | R | 0.5  | S | 0.25 |
| 1    | S | 0.25 | S | 0.125 | S | 8    | R | 1    |
| 8    | S | 128  | R | >128  | R | 0.5  | S | 1    |
| 2    | S | 16   | R | 2     | I | 0.5  | S | 0.25 |
| 4    | S | 0.5  | S | 128   | R | 0.5  | S | 0.5  |
| 128  | R | 128  | R | 64    | R | 0.5  | S | 1    |
| 16   | S | 128  | R | >128  | R | 0.5  | S | 1    |
| 1    | S | 0.25 | S | 32    | R | 0.5  | S | 1    |
| 32   | I | 16   | R | >128  | R | 0.5  | S | 1    |
| >128 | R | 256  | R | 128   | R | 0.5  | S | 1    |
| >128 | R | 256  | R | 128   | R | 0.5  | S | 1    |
| >128 | R | 256  | R | >128  | R | 0.5  | S | 1    |
| 2    | S | 1    | S | >128  | R | 0.5  | S | 1    |
| 2    | S | 1    | S | 4     | R | 4    | R | 1    |
| 2    | S | 16   | R | 1     | S | 1    | S | 2    |
| 2    | S | 0.5  | S | 1     | S | 1    | S | 0.5  |
| 1    | S | 1    | S | 0.125 | S | 0.5  | S | 8    |
| 4    | S | 1    | S | 64    | R | 0.25 | S | 0.5  |
| 2    | S | 64   | R | >128  | R | 0.5  | S | 1    |
| 2    | S | 16   | R | >128  | R | 0.5  | S | 1    |
| 2    | S | 64   | R | >128  | R | 0.5  | S | 1    |
| 2    | S | 128  | R | 1     | S | 0.5  | S | 1    |
| 2    | S | 128  | R | 1     | S | 0.5  | S | 1    |
| 1    | S | 1    | S | 2     | I | 0.5  | S | 1    |

| TGC_C | ESBL  | AmpC | ESBL_An | E_A_gro | Carbape | Hosp_g | ERT_g | IMP_g |
|-------|-------|------|---------|---------|---------|--------|-------|-------|
| S     | N     | N    |         |         | 0       |        | 0 R   | R     |
| S     | N     | N    |         |         | 0       |        | 0 R   | R     |
| S     | N     | N    |         |         | 0 IMP-8 |        | 0 R   | R     |
| S     | N     | N    |         |         | 0       |        | 0 R   | S     |
| S     | N     | N    |         |         | 0       |        | 0 S   | R     |
| S     | N     | N    |         |         | 0       |        | 0 R   | S     |
| R     | SHV   | N    |         |         | 1       |        | 0 R   | R     |
| S     | N     | N    |         |         | 0       |        | 0 R   | R     |
| R     | N     | N    |         |         | 0       |        | 0 R   | R     |
| S     | N     | N    |         |         | 0       |        | 0 S   | R     |
| S     | N     | N    |         |         | 0       |        | 0 S   | R     |
| S     | N     | N    |         |         | 0       |        | 0 R   | R     |
| S     | N     | N    |         |         | 0       |        | 0 R   | S     |
| S     | N     | N    |         |         | 0       |        | 0 R   | S     |
| R     | N     | N    |         |         | 0       |        | 0 R   | S     |
| S     | N     | MIR  |         |         | 2       |        | 0 R   | R     |
| R     | SHV   | ACT  | SHV,ACT |         | 3 IMP-8 |        | 0 R   | R     |
| S     | N     | N    |         |         | 0       |        | 0 R   | S     |
| S     | N     | N    |         |         | 0       |        | 0 R   | R     |
| S     | N     | N    |         |         | 0       |        | 0 R   | R     |
| S     | N     | N    |         |         | 0       |        | 0 S   | R     |
| S     | N     | N    |         |         | 0       |        | 0 R   | R     |
| R     | N     | N    |         |         | 0       |        | 0 R   | S     |
| S     | N     | N    |         |         | 0       |        | 0 R   | S     |
| S     | N     | N    |         |         | 0       |        | 0 R   | S     |
| S     | SHV   | N    |         |         | 1 IMP-8 |        | 0 R   | R     |
| S     | N     | N    |         |         | 0       |        | 0 R   | S     |
| S     | N     | DHA  |         |         | 2       |        | 0 R   | R     |
| S     | CTX-M | N    |         |         | 1       |        | 0 R   | S     |
| S     | N     | CMY  |         |         | 2       |        | 0 R   | S     |
| S     | CTX-M | CMY  | CTX-M,C |         | 3       |        | 0 R   | S     |
| S     | CTX-M | CMY  | CTX-M,C |         | 3       |        | 0 R   | S     |
| S     | N     | CMY  |         |         | 2       |        | 0 R   | R     |
| S     | N     | CMY  |         |         | 2       |        | 0 R   | R     |
| S     | N     | CMY  |         |         | 2       |        | 0 R   | R     |
| S     | N     | CMY  |         |         | 2       |        | 0 R   | R     |
| S     | N     | CMY  |         |         | 2       |        | 0 R   | R     |
| S     | N     | N    |         |         | 0       |        | 0 R   | S     |
| S     | N     | CMY  |         |         | 2       |        | 0 R   | R     |
| S     | N     | CMY  |         |         | 2       |        | 0 R   | R     |
| S     | CTX-M | N    |         |         | 1       |        | 0 R   | R     |
| S     | CTX-M | DHA  | CTX-M,E |         | 3       |        | 0 S   | R     |
| R     | SHV   | DHA  | SHV,DH/ |         | 3       |        | 0 R   | S     |
| S     | CTX-M | DHA  | CTX-M,E |         | 3       |        | 0 R   | R     |

|   |           |     |         |   |       |     |   |
|---|-----------|-----|---------|---|-------|-----|---|
| S | CTX-M     | DHA | CTX-M,E | 3 |       | 0 R | R |
| S | CTX-M     | N   |         | 1 |       | 0 R | S |
| S | N         | DHA |         | 2 |       | 0 R | S |
| S | N         | CMY |         | 2 |       | 0 R | R |
| S | N         | DHA |         | 2 |       | 0 R | R |
| S | N         | N   |         | 0 |       | 0 R | R |
| S | CTX-M     | DHA | CTX-M,E | 3 |       | 0 S | R |
| S | CTX-M     | DHA | CTX-M,E | 3 |       | 0 R | R |
| S | N         | DHA |         | 2 |       | 0 R | R |
| S | N         | DHA |         | 2 |       | 0 S | R |
| S | N         | CMY |         | 2 |       | 0 R | R |
| R | N         | DHA |         | 2 |       | 0 R | R |
| S | CTX-M     | DHA | CTX-M,E | 3 |       | 0 R | S |
| S | CTX-M     | DHA | CTX-M,E | 3 |       | 0 R | R |
| S | CTX-M     | CMY | CTX-M,C | 3 | KPC-2 | 0 R | R |
| R | N         | N   |         | 0 |       | 0 R | R |
| S | N         | N   |         | 0 |       | 0 R | R |
| S | N         | N   |         | 0 |       | 0 R | S |
| S | N         | N   |         | 0 |       | 0 R | S |
| S | N         | N   |         | 0 |       | 0 R | S |
| S | N         | MIR |         | 2 |       | 0 R | S |
| S | N         | N   |         | 0 |       | 0 R | S |
| S | N         | N   |         | 0 |       | 0 R | R |
| S | N         | MIR |         | 2 |       | 0 R | S |
| S | N         | N   |         | 0 |       | 0 R | S |
| R | N         | N   |         | 0 |       | 0 R | S |
| R | SHV       | N   |         | 1 |       | 0 R | S |
| S | N         | N   |         | 0 |       | 0 R | S |
| S | N         | N   |         | 0 |       | 0 R | S |
| R | N         | N   |         | 0 |       | 0 R | S |
| S | CTX-M     | DHA | CTX-M,E | 3 |       | 0 R | S |
| S | CTX-M     | N   |         | 1 |       | 0 R | S |
| S | CTX-M     | N   |         | 1 |       | 0 R | S |
| S | N         | DHA |         | 2 |       | 0 R | S |
| S | N         | DHA |         | 2 |       | 0 R | R |
| S | CTX-M & N |     |         | 1 |       | 0 R | S |
| S | CTX-M     | N   |         | 1 |       | 0 R | S |
| S | CTX-M     | N   |         | 1 |       | 0 R | S |
| S | CTX-M     | DHA | CTX-M,E | 3 |       | 0 R | S |
| S | SHV       | DHA | SHV,DH/ | 3 |       | 0 R | S |
| S | CTX-M     | DHA | CTX-M,E | 3 |       | 0 R | S |
| S | N         | N   |         | 0 |       | 0 R | S |
| S | CTX-M     | DHA | CTX-M,E | 3 |       | 0 R | R |
| S | CTX-M     | DHA | CTX-M,E | 3 |       | 0 R | S |
| S | CTX-M     | DHA | CTX-M,E | 3 |       | 0 R | R |
| R | N         | DHA |         | 2 |       | 0 R | R |

|   |             |     |         |         |     |   |
|---|-------------|-----|---------|---------|-----|---|
| S | N           | DHA |         | 2       | 0 R | S |
| R | N           | N   |         | 0       | 0 R | S |
| S | N           | DHA |         | 2       | 0 R | S |
| S | N           | CMY |         | 2       | 0 R | S |
| S | N           | N   |         | 0       | 0 R | S |
| S | N           | N   |         | 0       | 0 R | S |
| S | SHV         | N   |         | 1       | 0 R | S |
| S | N           | N   |         | 0       | 0 R | R |
| S | CTX-M       | CMY | CTX-M,C | 3       | 0 R | S |
| S | N           | CMY |         | 2       | 0 R | S |
| S | CTX-M & N   |     |         | 1 NDM-1 | 0 R | R |
| S | CTX-M       | DHA | CTX-M,E | 3       | 0 R | S |
| S | SHV         | N   |         | 1       | 0 R | S |
| S | CTX-M       | DHA | CTX-M,E | 3       | 0 R | S |
| S | N           | DHA |         | 2       | 0 R | R |
| S | CTX-M       | DHA | CTX-M,E | 3       | 0 R | S |
| S | N           | DHA |         | 2       | 0 R | S |
| S | N           | DHA |         | 2       | 0 R | S |
| R | N           | DHA |         | 2       | 0 R | S |
| S | CTX-M & DHA |     | CTX-M&  | 3       | 0 R | R |
| S | CTX-M       | DHA | CTX-M,E | 3       | 0 R | S |
| S | CTX-M       | DHA | CTX-M,E | 3       | 0 R | R |
| S | CTX-M       | DHA | CTX-M,E | 3       | 0 R | R |
| R | SHV         | DHA | SHV,DH, | 3       | 0 R | S |
| S | N           | CMY |         | 2 IMP-8 | 0 R | R |
| S | CTX-M       | DHA | CTX-M,E | 3       | 0 R | R |
| S | N           | DHA |         | 2       | 0 R | S |
| R | CTX-M       | N   |         | 1       | 0 R | R |
| S | N           | MIR |         | 2       | 0 R | S |
| R | N           | N   |         | 0       | 0 R | S |
| S | N           | N   |         | 0       | 0 R | S |
| S | CTX-M & DHA |     | CTX-M&  | 3       | 0 R | S |
| S | N           | DHA |         | 2       | 0 R | S |
| S | SHV         | DHA | SHV,DH, | 3       | 0 R | R |
| S | CTX-M       | DHA | CTX-M,E | 3       | 0 R | S |
| S | N           | N   |         | 0       | 0 R | S |
| S | N           | CMY |         | 2       | 0 R | S |
| S | SHV         | DHA | SHV,DH, | 3       | 0 R | S |
| S | CTX-M & N   |     |         | 1       | 0 R | R |
| S | N           | DHA |         | 2       | 0 R | S |
| S | CTX-M       | N   |         | 1       | 0 R | S |
| R | N           | N   |         | 0       | 0 R | S |
| S | N           | N   |         | 0       | 0 R | S |
| S | SHV         | N   |         | 1       | 0 R | S |
| S | CTX-M       | DHA | CTX-M,E | 3       | 0 R | R |
| S | N           | ACT |         | 2       | 0 R | R |

|   |       |         |         |   |     |   |
|---|-------|---------|---------|---|-----|---|
| S | SHV   | DHA     | SHV,DH, | 3 | 0 R | S |
| S | N     | CMY     |         | 2 | 0 R | S |
| S | CTX-M | N       |         | 1 | 0 R | S |
| S | N     | DHA     |         | 2 | 0 R | S |
| S | CTX-M | DHA     | CTX-M,E | 3 | 0 R | S |
| S | N     | N       |         | 0 | 0 R | S |
| R | N     | DHA     |         | 2 | 0 R | S |
| S | N     | DHA     |         | 2 | 0 R | S |
| S | N     | N       |         | 0 | 0 R | S |
| S | N     | N       |         | 0 | 0 R | S |
| S | N     | N       |         | 0 | 0 R | R |
| S | N     | DHA     |         | 2 | 0 R | S |
| S | N     | DHA, CM |         | 2 | 0 R | S |
| S | N     | MIR     |         | 2 | 0 R | S |
| S | N     | DHA     |         | 2 | 0 R | S |
| S | N     | DHA     |         | 2 | 0 R | S |
| S | N     | N       |         | 0 | 0 R | S |
| S | CTX-M | N       |         | 1 | 0 R | S |
| S | SHV   | DHA     | SHV,DH, | 3 | 0 R | R |
| S | SHV   | N       |         | 1 | 0 R | S |
| S | N     | DHA     |         | 2 | 0 R | S |
| S | N     | N       |         | 0 | 0 R | R |
| S | CTX-M | N       |         | 1 | 0 R | S |
| S | N     | N       |         | 0 | 0 R | S |
| S | N     | DHA     |         | 2 | 0 R | S |
| S | N     | DHA     |         | 2 | 0 R | R |
| S | N     | N       |         | 0 | 0 R | S |
| S | N     | DHA     |         | 2 | 0 R | S |
| R | N     | N       |         | 0 | 0 R | S |
| R | N     | N       |         | 0 | 0 R | S |
| S | N     | N       |         | 0 | 0 R | R |
| S | N     | CMY     |         | 2 | 0 R | S |
| S | N     | DHA     |         | 2 | 0 R | S |
| S | N     | DHA     |         | 2 | 0 R | R |
| S | N     | DHA     |         | 2 | 0 R | S |
| S | N     | ACT     |         | 2 | 0 R | S |
| S | N     | CMY     |         | 2 | 0 R | S |
| S | CTX-M | DHA     | CTX-M,E | 3 | 0 R | S |
| S | N     | DHA     |         | 2 | 0 R | R |
| R | SHV   | N       |         | 1 | 0 R | S |
| S | SHV   | DHA     | SHV,DH, | 3 | 0 R | S |
| S | N     | N       |         | 0 | 0 R | S |
| S | SHV   | DHA     | SHV,DH, | 3 | 0 R | R |
| R | N     | N       |         | 0 | 0 R | S |
| S | N     | N       |         | 0 | 0 R | S |
| S | N     | DHA     |         | 2 | 0 R | S |

|   |       |     |         |   |       |     |   |
|---|-------|-----|---------|---|-------|-----|---|
| S | CTX-M | CMY | CTX-M,C | 3 |       | 0 R | S |
| S | N     | DHA |         | 2 |       | 0 R | S |
| S | N     | DHA |         | 2 |       | 0 R | R |
| S | SHV   | DHA | SHV,DH, | 3 |       | 0 R | S |
| S | N     | MIR |         | 2 |       | 0 R | S |
| S | SHV   | ACT | SHV,ACT | 3 | IMP-8 | 0 R | R |
| S | SHV   | DHA | SHV,DH, | 3 |       | 0 R | S |
| S | N     | N   |         | 0 |       | 0 R | S |
| S | N     | DHA |         | 2 |       | 0 R | S |
| S | CTX-M | CMY | CTX-M,C | 3 |       | 0 R | S |
| S | N     | DHA |         | 2 |       | 0 R | S |
| S | N     | N   |         | 0 |       | 0 R | R |
| S | N     | MIR |         | 2 |       | 0 R | S |
| S | N     | N   |         | 0 |       | 0 R | S |
| S | CTX-M | N   |         | 1 |       | 0 R | S |
| S | N     | CMY |         | 2 |       | 0 R | S |
| S | N     | DHA |         | 2 |       | 0 R | S |
| S | N     | DHA |         | 2 |       | 0 R | S |
| S | N     | DHA |         | 2 |       | 0 S | R |
| S | SHV   | N   |         | 1 |       | 0 R | R |
| S | SHV   | DHA | SHV,DH, | 3 |       | 0 R | S |
| S | N     | ACT |         | 2 |       | 0 R | S |
| R | CTX-M | DHA | CTX-M,E | 3 |       | 0 R | S |
| R | N     | DHA |         | 2 |       | 0 R | S |
| S | CTX-M | CMY | CTX-M,C | 3 |       | 0 R | S |
| R | N     | MIR |         | 2 |       | 0 R | S |
| S | SHV   | DHA | SHV,DH, | 3 |       | 0 R | S |
| S | N     | DHA |         | 2 |       | 0 R | S |
| S | N     | N   |         | 0 | IMP-8 | 0 R | R |
| S | N     | N   |         | 0 |       | 0 R | S |
| R | N     | N   |         | 0 |       | 0 R | S |
| R | N     | N   |         | 0 |       | 0 R | R |
| S | N     | CMY |         | 2 |       | 0 R | S |
| R | N     | N   |         | 0 |       | 0 R | S |
| S | CTX-M | CMY | CTX-M,C | 3 |       | 0 R | S |
| R | CTX-M | N   |         | 1 |       | 0 R | R |
| S | N     | DHA |         | 2 |       | 0 R | S |
| S | N     | N   |         | 0 |       | 0 R | S |
| R | N     | CMY |         | 2 |       | 0 R | S |
| R | SHV   | N   |         | 1 |       | 0 R | S |
| S | CTX-M | DHA | CTX-M,E | 3 |       | 0 R | S |
| R | CTX-M | DHA | CTX-M,E | 3 |       | 0 R | S |
| S | N     | DHA |         | 2 |       | 0 R | S |
| S | CTX-M | DHA | CTX-M,E | 3 |       | 0 R | S |
| S | N     | N   |         | 0 | IMP-8 | 0 R | S |
| S | N     | N   |         | 0 |       | 0 R | S |



|   |       |     |         |   |       |   |
|---|-------|-----|---------|---|-------|---|
| S | CTX-M | N   |         | 1 | 0 R   | S |
| R | N     | N   |         | 0 | 0 R   | S |
| S | SHV   | CMY | SHV,CM' | 3 | 0 R   | S |
| S | CTX-M | N   |         | 1 | 0 R   | S |
| S | N     | CMY |         | 2 | 0 R   | S |
| S | CTX-M | N   |         | 1 | 0 R   | S |
| S | N     | DHA |         | 2 | 0 R   | R |
| S | CTX-M | DHA | CTX-M,E | 3 | 0 R   | S |
| S | N     | DHA |         | 2 | 0 R   | S |
| R | N     | N   |         | 0 | 0 R   | S |
| S | N     | N   |         | 0 | 0 R   | S |
| S | N     | N   |         | 0 | 0 R   | S |
| R | N     | DHA |         | 2 | 0 R   | S |
| S | N     | N   |         | 0 | 0 R   | S |
| S | N     | MIR |         | 2 | 0 R   | S |
| S | CTX-M | DHA | CTX-M,E | 3 | 0 R   | S |
| S | N     | CMY |         | 2 | 0 R   | R |
| S | N     | N   |         | 0 | 0 R   | S |
| S | CTX-M | DHA | CTX-M,E | 3 | 0 R   | S |
| S | N     | N   |         | 0 | 0 R   | S |
| S | SHV   | N   |         | 1 | 0 R   | R |
| S | N     | CMY |         | 2 | 0 R   | S |
| S | CTX-M | CMY | CTX-M,C | 3 | 0 R   | R |
| S | N     | DHA |         | 2 | 0 R   | S |
| S | CTX-M | DHA | CTX-M,E | 3 | 0 R   | R |
| S | CTX-M | DHA | CTX-M&  | 3 | 0 R   | S |
| S | CTX-M | DHA | CTX-M,E | 3 | 0 R   | S |
| S | N     | N   |         | 0 | 0 R   | S |
| S | N     | N   |         | 0 | 0 R   | S |
| R | N     | N   |         | 0 | 0 R   | R |
| S | N     | DHA |         | 2 | 0 R   | R |
| S | N     | N   |         | 0 | 0 R   | S |
| S | N     | N   |         | 0 | 0 R   | S |
| S | N     | ACT |         | 2 | 0 R   | R |
| S | N     | N   |         | 0 | 0 R   | R |
| S | N     | N   |         | 0 | 0 R   | S |
| S | N     | N   |         | 0 | 0 R   | R |
| S | N     | N   |         | 0 | 0 R   | S |
| S | N     | N   |         | 0 | 0 R   | S |
| S | N     | N   |         | 0 | 0 R   | R |
| S | N     | N   |         | 0 | 0 R   | S |
| S | N     | CMY |         | 2 | 0 R   | S |
| S | CTX-M | CMY | CTX-M,C | 3 | 0 R   | S |
| S | N     | CMY |         | 2 | 0 R   | S |
| S | N     | N   |         | 0 | KPC-2 | R |
| S | CTX-M | N   |         | 1 | 0 R   | S |
| S | CTX-M | DHA | CTX-M,E | 3 | 0 R   | S |

|   |         |     |         |         |     |   |
|---|---------|-----|---------|---------|-----|---|
| S | CTX-M   | DHA | CTX-M,E | 3       | 0 R | S |
| S | CTX-M   | DHA | CTX-M,E | 3       | 0 R | S |
| S | SHV     | DHA | SHV,DH/ | 3       | 0 R | S |
| S | N       | MIR |         | 2       | 0 R | S |
| S | CTX-M & | DHA | CTX-M&  | 3       | 0 R | S |
| S | CTX-M   | DHA | CTX-M,E | 3       | 0 R | S |
| S | N       | DHA |         | 2       | 0 R | S |
| S | CTX-M   | DHA | CTX-M,E | 3       | 0 R | S |
| S | N       | N   |         | 0       | 0 R | S |
| S | N       | N   |         | 0       | 0 R | S |
| R | N       | ACT |         | 2       | 0 R | S |
| S | N       | N   |         | 0       | 0 R | S |
| S | N       | DHA |         | 2       | 0 S | R |
| S | N       | ACT |         | 2       | 0 R | S |
| S | N       | N   |         | 0       | 0 R | S |
| S | CTX-M   | DHA | CTX-M,E | 3       | 0 R | S |
| S | N       | N   |         | 0       | 0 R | S |
| S | CTX-M   | N   |         | 1       | 0 R | S |
| S | N       | MIR |         | 2       | 0 R | S |
| S | N       | MIR |         | 2       | 0 R | S |
| S | SHV     | DHA | SHV,DH/ | 3       | 0 R | R |
| S | N       | N   |         | 0       | 0 R | S |
| S | N       | N   |         | 0       | 0 R | S |
| S | CTX-M   | N   |         | 1       | 0 R | S |
| S | N       | N   |         | 0       | 0 R | R |
| S | N       | N   |         | 0       | 0 R | R |
| S | N       | N   |         | 0       | 0 R | S |
| R | N       | N   |         | 0       | 0 R | R |
| R | CTX-M   | N   |         | 1       | 0 R | R |
| S | CTX-M & | N   |         | 1       | 0 R | S |
| S | N       | N   |         | 0       | 0 R | R |
| S | N       | N   |         | 0       | 0 R | R |
| S | CTX-M & | DHA | CTX-M&  | 3       | 0 R | R |
| S | CTX-M   | N   |         | 1       | 0 R | S |
| S | N       | DHA |         | 2       | 0 R | S |
| S | N       | N   |         | 0 IMP-8 | 0 R | R |
| S | N       | DHA |         | 2       | 0 R | R |
| S | CTX-M   | N   |         | 1       | 0 R | R |
| S | CTX-M   | DHA | CTX-M,E | 3       | 0 R | S |
| S | N       | CMY |         | 2       | 0 R | S |
| S | N       | N   |         | 0       | 0 R | S |
| S | CTX-M   | DHA | CTX-M,E | 3       | 0 R | R |
| R | N       | N   |         | 0       | 0 R | S |
| S | N       | CMY |         | 2       | 0 R | S |
| S | N       | N   |         | 0       | 0 R | S |
| S | N       | N   |         | 0       | 0 R | S |

|   |           |     |         |   |       |   |
|---|-----------|-----|---------|---|-------|---|
| S | N         | N   |         | 0 | 0 R   | S |
| S | N         | MIR |         | 2 | 0 R   | S |
| S | N         | MIR |         | 2 | 0 R   | R |
| S | N         | N   |         | 0 | 0 R   | S |
| R | SHV       | N   |         | 1 | 0 R   | S |
| S | CTX-M     | N   |         | 1 | 0 R   | S |
| R | N         | N   |         | 0 | 0 R   | S |
| S | N         | MIR |         | 2 | 0 R   | S |
| S | SHV       | N   |         | 1 | 0 R   | S |
| S | N         | N   |         | 0 | IMP-8 | R |
| S | N         | N   |         | 0 | 0 R   | S |
| S | N         | N   |         | 0 | 0 R   | S |
| R | SHV       | N   |         | 1 | IMP-8 | S |
| S | CTX-M & N |     |         | 1 | 0 R   | S |
| S | N         | ACT |         | 2 | 0 R   | S |
| S | N         | CMY |         | 2 | 0 R   | S |
| S | CTX-M     | N   |         | 1 | 0 R   | S |
| S | N         | DHA |         | 2 | 0 R   | S |
| S | CTX-M     | DHA | CTX-M,E | 3 | 0 R   | S |
| R | N         | N   |         | 0 | 0 R   | S |
| S | CTX-M     | DHA | CTX-M,E | 3 | 0 R   | R |
| S | CTX-M     | DHA | CTX-M,E | 3 | 0 R   | R |
| S | N         | DHA |         | 2 | 0 R   | R |
| S | CTX-M     | CMY | CTX-M,C | 3 | 0 R   | S |
| R | N         | N   |         | 0 | 0 R   | R |
| R | N         | N   |         | 0 | 0 R   | R |
| R | SHV       | N   |         | 1 | VIM-1 | R |
| S | N         | CMY |         | 2 | 0 R   | S |
| S | SHV       | N   |         | 1 | KPC-2 | R |
| S | N         | DHA |         | 2 | 0 S   | R |
| S | CTX-M     | DHA | CTX-M,E | 3 | 0 R   | S |
| S | N         | DHA |         | 2 | 0 R   | S |
| S | SHV       | N   |         | 1 | 0 R   | S |
| R | CTX-M     | DHA | CTX-M,E | 3 | 0 R   | R |
| S | N         | CMY |         | 2 | 0 R   | S |
| S | N         | N   |         | 0 | 0 R   | S |
| S | N         | N   |         | 0 | 0 R   | R |
| S | N         | CMY |         | 2 | 0 R   | S |
| S | N         | N   |         | 0 | 0 R   | R |
| S | N         | MIR |         | 2 | 0 R   | R |
| S | N         | DHA |         | 2 | 0 R   | S |
| S | SHV       | N   |         | 1 | 0 R   | R |
| S | N         | DHA |         | 2 | 0 R   | R |
| S | CTX-M & N |     |         | 1 | KPC-2 | R |
| S | CTX-M & N |     |         | 1 | KPC-2 | R |
| S | CTX-M & N |     |         | 1 | KPC-2 | R |

|   |           |         |         |         |     |   |
|---|-----------|---------|---------|---------|-----|---|
| S | CTX-M     | DHA     | CTX-M,E | 3       | 0 R | S |
| S | N         | N       |         | 0       | 0 R | S |
| S | N         | N       |         | 0       | 0 R | S |
| S | N         | N       |         | 0       | 0 R | S |
| S | CTX-M & N |         |         | 1 KPC-2 | 0 R | R |
| S | CTX-M & N |         |         | 1 KPC-2 | 0 R | R |
| S | N         | DHA     |         | 2       | 0 R | R |
| S | CTX-M     | DHA     | CTX-M,E | 3       | 0 R | R |
| S | CTX-M     | DHA     | CTX-M,E | 3       | 0 R | S |
| S | N         | DHA     |         | 2       | 0 R | S |
| S | N         | CMY     |         | 2       | 0 R | S |
| S | N         | CMY     |         | 2       | 0 R | R |
| S | CTX-M     | DHA     | CTX-M,E | 3       | 0 R | R |
| S | CTX-M     | DHA     | CTX-M,E | 3       | 0 R | R |
| S | N         | MIR     |         | 2       | 0 R | S |
| S | N         | N       |         | 0       | 0 R | S |
| S | CTX-M     | DHA     | CTX-M,E | 3       | 0 R | S |
| S | CTX-M     | DHA     | CTX-M,E | 3       | 0 R | S |
| S | CTX-M     | DHA     | CTX-M,E | 3       | 0 R | S |
| S | CTX-M     | DHA     | CTX-M,E | 3       | 0 R | S |
| S | N         | DHA     |         | 2       | 0 R | R |
| S | N         | DHA     |         | 2       | 0 R | S |
| S | SHV       | DHA     | SHV,DH  | 3       | 0 R | R |
| S | N         | DHA     |         | 2       | 0 R | R |
| S | N         | DHA     |         | 2       | 0 R | S |
| S | CTX-M     | DHA     | CTX-M,E | 3       | 1 R | S |
| S | N         | DHA     |         | 2       | 1 R | R |
| R | N         | N       |         | 0 IMP-8 | 1 R | S |
| S | N         | DHA, CM |         | 2       | 1 R | S |
| S | N         | CMY     |         | 2       | 1 R | S |
| S | N         | N       |         | 0 IMP-8 | 1 R | S |
| S | CTX-M     | DHA     | CTX-M,E | 3       | 1 R | S |
| S | N         | N       |         | 0       | 1 R | S |
| S | N         | CMY     |         | 2       | 1 R | S |
| S | CTX-M     | DHA     | CTX-M,E | 3       | 1 R | S |
| S | N         | DHA     |         | 2       | 1 R | R |
| S | N         | CMY     |         | 2       | 1 R | S |
| S | CTX-M     | DHA     | CTX-M,E | 3       | 1 R | S |
| S | N         | CMY     |         | 2       | 1 R | S |
| S | N         | CMY     |         | 2       | 1 R | S |
| S | CTX-M     | DHA     | CTX-M,E | 3       | 1 R | R |
| S | CTX-M     | DHA     | CTX-M,E | 3       | 1 R | R |
| S | N         | CMY     |         | 2       | 1 R | S |
| S | CTX-M     | DHA     | CTX-M,E | 3       | 1 R | R |
| S | N         | CMY     |         | 2       | 1 R | R |
| S | CTX-M     | DHA     | CTX-M,E | 3       | 1 R | S |

|   |           |         |         |         |     |   |
|---|-----------|---------|---------|---------|-----|---|
| S | N         | N       |         | 0       | 1 R | S |
| S | CTX-M     | DHA     | CTX-M,E | 3       | 1 R | S |
| S | CTX-M     | DHA     | CTX-M,E | 3       | 1 R | R |
| S | N         | DHA     |         | 2       | 1 R | S |
| S | N         | CMY     |         | 2       | 1 R | S |
| S | N         | DHA, CM |         | 2       | 1 R | S |
| S | N         | DHA, CM |         | 2       | 1 R | R |
| S | CTX-M     | DHA     | CTX-M,E | 3       | 1 R | R |
| S | N         | DHA     |         | 2       | 1 R | R |
| S | SHV, OX N |         |         | 1 IMP-8 | 1 R | R |
| S | CTX-M     | DHA     | CTX-M,E | 3       | 1 R | S |
| S | N         | CMY     |         | 2       | 1 R | S |
| S | CTX-M     | DHA     | CTX-M,E | 3       | 1 R | S |
| S | CTX-M     | N       |         | 1       | 1 R | R |
| S | CTX-M &   | DHA     | CTX-M&  | 3       | 1 R | R |
| S | CTX-M     | DHA     | CTX-M,E | 3       | 1 R | R |
| S | CTX-M     | CMY     | CTX-M,C | 3       | 1 R | S |
| S | CTX-M     | DHA     | CTX-M,E | 3       | 1 R | S |
| S | N         | N       |         | 0       | 1 R | S |
| S | N         | DHA     |         | 2       | 1 R | S |
| R | N         | DHA, CM |         | 2       | 1 R | R |
| S | N         | CMY     |         | 2       | 1 R | S |
| S | CTX-M     | DHA     | CTX-M,E | 3       | 1 R | S |
| S | CTX-M     | DHA     | CTX-M,E | 3       | 1 R | S |
| S | N         | DHA     |         | 2       | 1 R | R |
| S | N         | DHA     |         | 2       | 1 R | S |
| S | CTX-M     | DHA     | CTX-M,E | 3       | 1 R | R |
| S | CTX-M     | DHA     | CTX-M,E | 3       | 1 R | S |
| S | CTX-M     | DHA     | CTX-M,E | 3       | 1 R | S |
| S | CTX-M     | DHA     | CTX-M,E | 3       | 1 R | R |
| S | CTX-M     | DHA     | CTX-M,E | 3       | 1 R | S |
| S | SHV       | DHA     | SHV,DH/ | 3       | 1 R | S |
| S | CTX-M     | DHA     | CTX-M,E | 3       | 1 R | R |
| S | CTX-M     | CMY     | CTX-M,C | 3       | 1 R | S |
| S | N         | N       |         | 0       | 1 R | S |
| S | CTX-M     | DHA     | CTX-M,E | 3       | 1 R | S |
| S | CTX-M     | DHA     | CTX-M,E | 3       | 1 R | S |
| S | N         | MIR     |         | 2       | 1 R | S |
| R | SHV       | N       |         | 1       | 1 R | S |
| R | SHV       | N       |         | 1       | 1 R | R |
| S | CTX-M     | DHA     | CTX-M,E | 3       | 1 R | S |
| S | N         | N       |         | 0       | 1 R | R |
| S | N         | N       |         | 0       | 1 R | S |
| S | CTX-M     | N       |         | 1       | 1 R | R |
| S | N         | N       |         | 0       | 1 R | R |
| S | N         | DHA     |         | 2       | 1 R | S |

|   |           |         |         |   |       |     |   |
|---|-----------|---------|---------|---|-------|-----|---|
| S | CTX-M     | DHA     | CTX-M,E | 3 |       | 1 R | S |
| R | N         | N       |         | 0 |       | 0 R | S |
| S | CTX-M     | DHA     | CTX-M,E | 3 |       | 0 R | S |
| S | CTX-M     | DHA     | CTX-M,E | 3 |       | 0 R | S |
| S | N         | CMY     |         | 2 |       | 0 R | R |
| S | N         | N       |         | 0 |       | 0 R | S |
| S | N         | N       |         | 0 |       | 0 R | R |
| R | CTX-M     | DHA     | CTX-M,E | 3 |       | 0 R | S |
| R | CTX-M     | N       |         | 1 |       | 0 R | S |
| S | CTX-M     | DHA     | CTX-M,E | 3 |       | 0 R | R |
| S | N         | N       |         | 0 |       | 0 R | S |
| S | CTX-M     | DHA     | CTX-M,E | 3 |       | 0 R | S |
| S | SHV       | N       |         | 1 | KPC-2 | 0 R | R |
| S | CTX-M     | CMY     | CTX-M,C | 3 |       | 0 R | S |
| S | N         | N       |         | 0 |       | 0 R | S |
| S | N         | ACT     |         | 2 |       | 0 R | S |
| S | N         | N       |         | 0 |       | 0 R | S |
| R | CTX-M     | DHA     | CTX-M,E | 3 |       | 0 R | R |
| R | N         | N       |         | 0 |       | 0 R | S |
| S | CTX-M     | CMY     | CTX-M,C | 3 |       | 0 R | R |
| S | CTX-M     | DHA     | CTX-M,E | 3 |       | 0 R | S |
| S | CTX-M     | DHA     | CTX-M,E | 3 |       | 0 R | R |
| R | SHV       | N       |         | 1 |       | 0 R | S |
| S | N         | DHA, MI |         | 2 |       | 0 R | R |
| S | N         | N       |         | 0 | IMP-8 | 0 R | R |
| S | N         | DHA     |         | 2 |       | 0 R | R |
| R | N         | DHA     |         | 2 |       | 0 R | S |
| S | N         | N       |         | 0 |       | 0 R | R |
| S | CTX-M     | DHA     | CTX-M,E | 3 |       | 0 R | S |
| S | N         | N       |         | 0 |       | 0 S | R |
| S | CTX-M     | CMY     | CTX-M,C | 3 |       | 0 R | S |
| S | CTX-M & N |         |         | 1 | KPC-2 | 0 R | R |
| S | N         | CMY     |         | 2 |       | 0 R | R |
| S | CTX-M     | DHA     | CTX-M,E | 3 |       | 0 R | S |
| S | CTX-M     | DHA     | CTX-M,E | 3 |       | 0 R | R |
| S | CTX-M & N |         |         | 1 |       | 0 R | S |
| S | N         | N       |         | 0 |       | 0 R | S |
| S | CTX-M     | N       |         | 1 |       | 0 R | R |
| S | N         | CMY     |         | 2 |       | 0 R | S |
| S | N         | DHA     |         | 2 |       | 0 R | S |
| R | CTX-M     | N       |         | 1 |       | 0 R | S |
| S | N         | N       |         | 0 |       | 0 R | S |
| S | SHV       | N       |         | 1 |       | 0 R | S |
| S | SHV       | N       |         | 1 | IMP-8 | 0 R | R |
| S | N         | CMY     |         | 2 |       | 0 R | R |
| S | CTX-M     | DHA     | CTX-M,E | 3 |       | 1 R | S |

|   |       |         |         |   |     |   |
|---|-------|---------|---------|---|-----|---|
| S | N     | N       |         | 0 | 1 R | S |
| S | N     | DHA     |         | 2 | 1 R | S |
| S | N     | DHA     |         | 2 | 1 R | S |
| S | CTX-M | DHA     | CTX-M,E | 3 | 1 R | R |
| S | N     | DHA     |         | 2 | 1 R | S |
| S | N     | DHA, CM |         | 2 | 1 R | S |
| S | N     | DHA, CM |         | 2 | 1 R | S |
| S | N     | DHA     |         | 2 | 1 R | S |
| S | N     | CMY     |         | 2 | 1 R | S |
| S | N     | DHA     |         | 2 | 1 R | S |
| S | CTX-M | DHA     | CTX-M,E | 3 | 1 R | R |
| S | N     | N       |         | 0 | 0 R | R |
| S | N     | CMY     |         | 2 | 0 R | S |
| S | CTX-M | N       |         | 1 | 0 R | R |
| S | N     | DHA     |         | 2 | 0 R | R |
| S | CTX-M | N       |         | 1 | 0 R | S |
| S | CTX-M | N       |         | 1 | 0 R | R |
| S | SHV   | ACT     | SHV,ACT | 3 | 0 R | R |
| S | N     | N       |         | 0 | 0 R | S |
| S | N     | N       |         | 0 | 0 R | S |
| S | SHV   | N       |         | 1 | 0 R | R |
| S | N     | N       |         | 0 | 0 R | R |
| S | CTX-M | CMY     | CTX-M,C | 3 | 0 R | R |
| S | CTX-M | CMY     | CTX-M,C | 3 | 0 R | R |
| S | SHV   | N       |         | 1 | 0 R | S |
| S | N     | DHA     |         | 2 | 0 R | S |
| S | N     | DHA     |         | 2 | 0 R | R |
| S | CTX-M | DHA     | CTX-M,E | 3 | 0 R | S |
| S | CTX-M | DHA     | CTX-M,E | 3 | 0 R | S |
| S | CTX-M | DHA     | CTX-M,E | 3 | 0 R | S |
| S | CTX-M | DHA     | CTX-M,E | 3 | 0 R | S |
| S | CTX-M | DHA     | CTX-M,E | 3 | 0 R | S |
| S | CTX-M | DHA     | CTX-M,E | 3 | 0 R | S |
| S | CTX-M | DHA     | CTX-M,E | 3 | 0 R | S |
| S | CTX-M | N       |         | 1 | 0 R | S |
| S | N     | DHA     |         | 2 | 0 R | R |
| S | N     | CMY     |         | 2 | 0 R | S |
| S | SHV   | N       |         | 1 | 0 R | S |
| S | N     | DHA     |         | 2 | 0 R | R |
| R | N     | N       |         | 0 | 0 R | S |
| S | CTX-M | DHA     | CTX-M,E | 3 | 0 R | S |
| S | CTX-M | DHA     | CTX-M,E | 3 | 0 R | S |
| S | N     | CMY     |         | 2 | 0 R | S |
| S | CTX-M | N       |         | 1 | 0 R | S |
| R | SHV   | N       |         | 1 | 0 R | S |
| S | N     | N       |         | 0 | 0 R | S |

|   |       |     |         |   |       |     |   |
|---|-------|-----|---------|---|-------|-----|---|
| S | CTX-M | N   |         | 1 |       | 0 R | R |
| S | CTX-M | CMY | CTX-M,C | 3 |       | 0 R | S |
| S | CTX-M | DHA | CTX-M,E | 3 |       | 0 R | S |
| S | N     | MIR |         | 2 |       | 0 R | R |
| S | N     | DHA |         | 2 |       | 0 S | R |
| S | CTX-M | DHA | CTX-M,E | 3 |       | 0 R | S |
| S | CTX-M | DHA | CTX-M,E | 3 |       | 0 R | R |
| S | CTX-M | N   |         | 1 |       | 0 R | R |
| S | N     | N   |         | 0 | IMP-8 | 0 S | R |
| S | N     | DHA |         | 2 |       | 0 R | S |
| S | CTX-M | DHA | CTX-M,E | 3 |       | 0 R | R |
| R | N     | N   |         | 0 |       | 0 R | S |
| S | N     | CMY |         | 2 |       | 0 R | R |
| S | CTX-M | DHA | CTX-M,E | 3 |       | 0 R | S |
| S | N     | DHA |         | 2 |       | 0 R | R |
| S | N     | N   |         | 0 |       | 0 R | S |
| S | CTX-M | DHA | CTX-M,E | 3 |       | 0 R | R |
| S | CTX-M | DHA | CTX-M,E | 3 |       | 0 R | R |
| S | CTX-M | DHA | CTX-M,E | 3 |       | 0 R | S |
| S | N     | N   |         | 0 |       | 0 R | S |
| S | CTX-M | DHA | CTX-M,E | 3 |       | 0 R | R |
| S | SHV   | DHA | SHV,DH  | 3 |       | 0 R | S |
| S | N     | CMY |         | 2 |       | 0 R | S |
| S | N     | N   |         | 0 |       | 0 R | R |
| S | N     | N   |         | 0 |       | 0 R | R |
| S | N     | MIR |         | 2 |       | 0 R | S |
| S | N     | N   |         | 0 |       | 0 R | S |
| R | N     | N   |         | 0 |       | 0 R | S |
| S | CTX-M | DHA | CTX-M,E | 3 |       | 0 R | R |
| S | SHV   | DHA | SHV,DH  | 3 |       | 0 R | S |
| S | CTX-M | DHA | CTX-M,E | 3 |       | 0 R | S |
| S | CTX-M | DHA | CTX-M,E | 3 |       | 0 R | S |
| R | N     | N   |         | 0 |       | 0 R | S |
| S | N     | DHA |         | 2 |       | 0 R | R |
| S | CTX-M | DHA | CTX-M,E | 3 |       | 0 R | S |
| S | N     | N   |         | 0 | KPC-2 | 0 R | R |
| S | N     | N   |         | 0 |       | 0 R | S |
| S | N     | MIR |         | 2 |       | 0 R | S |
| S | CTX-M | DHA | CTX-M,E | 3 |       | 0 R | S |
| S | N     | MIR |         | 2 |       | 0 R | S |
| S | N     | MIR |         | 2 |       | 0 R | S |
| S | N     | N   |         | 0 |       | 0 R | S |
| S | N     | N   |         | 0 |       | 0 R | S |
| S | N     | MIR |         | 2 |       | 0 R | S |
| S | N     | N   |         | 0 |       | 0 R | S |
| S | N     | N   |         | 0 |       | 0 R | S |



|   |       |     |         |   |     |   |
|---|-------|-----|---------|---|-----|---|
| S | N     | DHA |         | 2 | 0 R | S |
| S | CTX-M | CMY | CTX-M,C | 3 | 0 R | S |
| S | N     | N   |         | 0 | 0 R | S |
| S | CTX-M | DHA | CTX-M,E | 3 | 0 R | S |
| S | CTX-M | N   |         | 1 | 0 R | S |
| S | SHV   | DHA | SHV,DH, | 3 | 0 R | S |
| S | N     | CMY |         | 2 | 0 R | S |
| S | N     | DHA |         | 2 | 0 R | S |
| S | SHV   | DHA | SHV,DH, | 3 | 0 R | S |
| S | N     | N   |         | 0 | 0 R | S |
| S | N     | N   |         | 0 | 0 R | R |
| S | N     | N   |         | 0 | 0 R | S |
| S | N     | N   |         | 0 | 0 R | S |
| S | N     | N   |         | 0 | 0 R | S |
| S | N     | N   |         | 0 | 0 R | S |
| S | N     | N   |         | 0 | 0 R | S |
| S | N     | N   |         | 0 | 0 R | S |
| S | N     | N   |         | 0 | 0 R | S |
| R | N     | N   |         | 0 | 0 R | S |
| S | N     | CMY |         | 2 | 0 R | S |
| S | CTX-M | CMY | CTX-M,C | 3 | 0 R | S |
| S | SHV   | N   |         | 1 | 0 R | S |
| S | CTX-M | N   |         | 1 | 0 R | S |
| S | CTX-M | DHA | CTX-M,E | 3 | 0 R | S |
| S | CTX-M | DHA | CTX-M&  | 3 | 0 R | S |
| R | N     | N   |         | 0 | 0 R | R |
| S | N     | DHA |         | 2 | 0 R | R |
| S | N     | DHA |         | 2 | 0 R | S |
| S | N     | DHA |         | 2 | 0 R | S |
| S | CTX-M | DHA | CTX-M,E | 3 | 0 R | S |
| S | N     | DHA |         | 2 | 0 R | S |
| S | CTX-M | DHA | CTX-M,E | 3 | 0 R | R |
| S | N     | CMY |         | 2 | 0 R | S |
| R | N     | N   |         | 0 | 0 R | R |
| S | N     | N   |         | 0 | 0 R | S |
| S | N     | N   |         | 0 | 0 R | S |
| R | SHV   | N   |         | 1 | 0 R | S |
| S | CTX-M | CMY | CTX-M,C | 3 | 0 R | S |
| S | N     | DHA |         | 2 | 0 R | S |
| S | N     | CMY |         | 2 | 0 R | R |
| S | CTX-M | N   |         | 1 | 0 R | S |
| S | SHV   | N   |         | 1 | 0 R | S |
| S | CTX-M | N   |         | 1 | 0 R | S |
| S | CTX-M | N   |         | 1 | 0 R | S |
| S | CTX-M | DHA | CTX-M,E | 3 | 0 R | S |
| S | SHV   | DHA | SHV,DH, | 3 | 0 R | S |

|   |         |         |         |         |     |   |
|---|---------|---------|---------|---------|-----|---|
| S | CTX-M   | DHA     | CTX-M,E | 3       | 0 R | S |
| S | N       | CMY     |         | 2       | 0 R | R |
| S | N       | DHA     |         | 2       | 0 R | R |
| S | N       | CMY     |         | 2       | 0 R | R |
| S | N       | CMY     |         | 2       | 0 R | R |
| S | N       | N       |         | 0       | 0 R | S |
| S | N       | N       |         | 0       | 0 R | S |
| S | N       | N       |         | 0       | 0 R | S |
| S | N       | N       |         | 0       | 0 R | S |
| S | N       | MIR     |         | 2       | 0 R | S |
| S | N       | N       |         | 0       | 0 R | S |
| S | N       | MIR     |         | 2       | 0 R | R |
| S | N       | N       |         | 0       | 0 R | S |
| S | N       | N       |         | 0       | 0 R | S |
| S | N       | N       |         | 0       | 0 R | R |
| R | N       | N       |         | 0       | 0 R | S |
| S | CTX-M   | N       |         | 1       | 0 R | S |
| S | CTX-M   | CMY     | CTX-M,C | 3       | 0 R | S |
| S | SHV     | DHA     | SHV,DH, | 3       | 0 R | S |
| S | CTX-M   | DHA     | CTX-M,E | 3       | 0 R | S |
| S | CTX-M & | DHA     | CTX-M&  | 3       | 0 R | S |
| S | CTX-M   | DHA     | CTX-M,E | 3       | 0 R | S |
| S | CTX-M   | DHA     | CTX-M,E | 3       | 0 R | R |
| S | CTX-M   | DHA     | CTX-M,E | 3       | 0 R | S |
| S | N       | DHA     |         | 2       | 0 R | R |
| S | N       | DHA     |         | 2       | 0 R | S |
| S | N       | DHA     |         | 2       | 0 R | S |
| S | CTX-M   | DHA     | CTX-M,E | 3       | 0 R | S |
| S | CTX-M & | N       |         | 1 VIM-1 | 0 R | R |
| S | N       | DHA     |         | 2       | 0 R | S |
| S | N       | DHA, CM |         | 2       | 0 R | S |
| S | N       | N       |         | 0       | 0 R | S |
| S | N       | N       |         | 0       | 0 R | S |
| S | N       | ACT     |         | 2       | 0 R | S |
| R | N       | N       |         | 0       | 0 R | S |
| S | N       | N       |         | 0       | 0 R | S |
| S | CTX-M   | N       |         | 1       | 0 R | S |
| S | CTX-M   | CMY     | CTX-M,C | 3       | 0 R | S |
| S | N       | N       |         | 0       | 0 R | S |
| S | N       | DHA     |         | 2       | 0 R | S |
| S | N       | DHA     |         | 2       | 0 R | S |
| S | N       | DHA     |         | 2       | 0 R | S |
| S | N       | DHA     |         | 2       | 0 R | S |
| S | N       | CMY     |         | 2       | 0 R | S |
| S | CTX-M   | DHA     | CTX-M,E | 3       | 0 R | R |
| S | N       | N       |         | 0       | 0 R | S |

|   |       |     |         |   |       |     |   |
|---|-------|-----|---------|---|-------|-----|---|
| S | N     | N   |         | 0 |       | 0 R | S |
| S | N     | N   |         | 0 |       | 0 R | S |
| S | N     | N   |         | 0 |       | 0 R | R |
| S | N     | N   |         | 0 |       | 0 R | S |
| S | N     | ACT |         | 2 |       | 0 R | S |
| S | N     | CMY |         | 2 |       | 0 R | S |
| S | CTX-M | DHA | CTX-M,E | 3 |       | 0 R | R |
| S | N     | MIR |         | 2 |       | 0 R | R |
| S | N     | N   |         | 0 |       | 0 R | R |
| S | CTX-M | DHA | CTX-M,E | 3 |       | 0 R | S |
| S | CTX-M | DHA | CTX-M,E | 3 |       | 0 R | S |
| S | CTX-M | DHA | CTX-M,E | 3 |       | 0 R | S |
| S | CTX-M | DHA | CTX-M,E | 3 |       | 0 R | S |
| S | N     | MIR |         | 2 |       | 0 R | S |
| S | N     | N   |         | 0 |       | 0 R | S |
| S | CTX-M | N   |         | 1 |       | 0 R | S |
| S | N     | N   |         | 0 |       | 0 R | S |
| S | N     | N   |         | 0 |       | 0 R | S |
| S | CTX-M | CMY | CTX-M,C | 3 |       | 0 R | R |
| S | N     | N   |         | 0 | IMP-8 | 0 R | S |
| S | CTX-M | CMY | CTX-M,C | 3 | IMP-8 | 0 R | R |
| S | SHV   | DHA | SHV,DH/ | 3 |       | 0 R | R |
| S | N     | N   |         | 0 |       | 0 R | S |
| S | N     | N   |         | 0 |       | 0 R | S |
| S | N     | DHA |         | 2 |       | 0 S | R |
| S | N     | DHA |         | 2 |       | 0 R | S |
| S | SHV   | N   |         | 1 |       | 0 R | S |
| S | N     | N   |         | 0 |       | 0 R | S |
| S | SHV   | DHA | SHV,DH/ | 3 |       | 0 R | S |
| S | CTX-M | DHA | CTX-M,E | 3 |       | 0 R | S |
| S | CTX-M | CMY | CTX-M,C | 3 |       | 0 R | R |
| S | N     | CMY |         | 2 |       | 0 R | S |
| S | CTX-M | DHA | CTX-M,E | 3 |       | 0 R | S |
| S | CTX-M | DHA | CTX-M,E | 3 |       | 1 R | S |
| S | CTX-M | DHA | CTX-M,E | 3 |       | 1 R | S |
| S | CTX-M | DHA | CTX-M,E | 3 |       | 1 R | R |
| S | N     | CMY |         | 2 |       | 1 R | S |
| S | CTX-M | CMY | CTX-M&  | 3 |       | 1 R | S |
| S | CTX-M | DHA | CTX-M,E | 3 |       | 1 R | S |
| S | CTX-M | DHA | CTX-M,E | 3 |       | 1 R | S |
| S | N     | CMY |         | 2 |       | 1 R | S |
| S | CTX-M | DHA | CTX-M,E | 3 |       | 1 R | S |
| S | N     | CMY |         | 2 |       | 1 R | S |
| S | N     | DHA |         | 2 |       | 1 R | S |
| S | N     | DHA |         | 2 |       | 1 R | R |
| S | CTX-M | CMY | CTX-M,C | 3 |       | 1 R | S |

|   |             |     |         |         |     |   |
|---|-------------|-----|---------|---------|-----|---|
| S | N           | N   |         | 0       | 1 R | R |
| S | CTX-M       | DHA | CTX-M,E | 3       | 1 R | S |
| S | CTX-M       | DHA | CTX-M,E | 3       | 1 R | S |
| S | N           | N   |         | 0       | 1 R | S |
| S | SHV         | ACT | SHV,ACT | 3 IMP-8 | 1 R | R |
| S | N           | CMY |         | 2       | 1 R | R |
| R | N           | N   |         | 0 IMP-8 | 1 R | R |
| S | N           | CMY |         | 2       | 1 R | S |
| S | N           | DHA |         | 2       | 1 R | S |
| S | CTX-M       | DHA | CTX-M,E | 3       | 1 R | S |
| S | CTX-M       | DHA | CTX-M,E | 3       | 1 R | S |
| S | N           | DHA |         | 2       | 1 R | S |
| S | N           | DHA |         | 2       | 1 R | S |
| S | CTX-M       | DHA | CTX-M,E | 3       | 1 R | S |
| S | CTX-M       | N   |         | 1       | 1 R | S |
| S | CTX-M       | DHA | CTX-M,E | 3       | 1 R | S |
| S | SHV         | DHA | SHV,DH/ | 3       | 1 R | S |
| S | N           | DHA |         | 2       | 1 R | S |
| S | SHV         | DHA | SHV,DH/ | 3       | 1 R | S |
| S | SHV         | DHA | SHV,DH/ | 3       | 1 R | S |
| S | CTX-M & N   |     |         | 1       | 1 R | S |
| R | N           | DHA |         | 2       | 1 R | S |
| S | CTX-M       | DHA | CTX-M,E | 3       | 1 R | S |
| R | SHV         | DHA | SHV,DH/ | 3       | 1 R | S |
| S | N           | DHA |         | 2       | 1 R | S |
| S | CTX-M       | DHA | CTX-M,E | 3       | 1 R | S |
| S | N           | DHA |         | 2       | 1 R | S |
| S | SHV         | DHA | SHV,DH/ | 3       | 1 R | S |
| S | N           | N   |         | 0       | 1 R | S |
| S | CTX-M       | N   |         | 1       | 1 R | S |
| S | CTX-M       | CMY | CTX-M,C | 3       | 1 R | S |
| S | SHV         | DHA | SHV,DH/ | 3       | 1 R | S |
| S | SHV         | DHA | SHV,DH/ | 3       | 1 R | S |
| S | N           | DHA |         | 2       | 1 R | R |
| S | CTX-M       | DHA | CTX-M,E | 3       | 1 R | S |
| S | CTX-M       | DHA | CTX-M,E | 3       | 1 R | S |
| S | N           | DHA |         | 2       | 1 R | R |
| S | N           | DHA |         | 2       | 1 R | S |
| S | N           | DHA |         | 2       | 1 R | S |
| S | CTX-M & DHA |     | CTX-M&  | 3       | 1 R | R |
| S | CTX-M       | DHA | CTX-M,E | 3       | 1 R | R |
| S | N           | DHA |         | 2       | 1 R | S |
| S | CTX-M       | DHA | CTX-M,E | 3       | 1 R | S |
| S | CTX-M       | DHA | CTX-M,E | 3       | 1 R | S |
| S | N           | DHA |         | 2       | 1 R | S |
| S | CTX-M       | CMY | CTX-M,C | 3       | 1 R | S |

|   |       |     |         |         |     |   |
|---|-------|-----|---------|---------|-----|---|
| S | CTX-M | DHA | CTX-M,E | 3       | 1 R | S |
| S | CTX-M | DHA | CTX-M,E | 3       | 1 R | S |
| S | CTX-M | CMY | CTX-M,C | 3       | 1 R | S |
| S | CTX-M | DHA | CTX-M,E | 3       | 1 R | S |
| S | SHV   | DHA | SHV,DH/ | 3       | 1 R | S |
| S | CTX-M | DHA | CTX-M,E | 3       | 1 R | S |
| S | CTX-M | DHA | CTX-M,E | 3       | 1 R | S |
| S | CTX-M | DHA | CTX-M,E | 3       | 1 R | S |
| S | CTX-M | DHA | CTX-M,E | 3       | 1 R | S |
| S | CTX-M | DHA | CTX-M,E | 3       | 1 R | S |
| S | N     | N   |         | 0 IMP-8 | 1 R | S |
| S | N     | N   |         | 0 IMP-8 | 1 R | R |
| S | CTX-M | CMY | CTX-M,C | 3       | 1 R | S |
| S | N     | N   |         | 0       | 1 R | S |
| S | CTX-M | CMY | CTX-M,C | 3       | 1 R | S |
| S | CTX-M | N   |         | 1       | 1 R | R |
| S | N     | N   |         | 0 IMP-8 | 1 R | S |
| S | CTX-M | DHA | CTX-M,E | 3       | 1 R | S |
| S | CTX-M | N   |         | 1       | 1 R | S |
| S | SHV   | N   |         | 1 IMP-8 | 1 R | R |
| S | CTX-M | CMY | CTX-M,C | 3       | 1 R | S |
| R | N     | N   |         | 0 IMP-8 | 1 R | S |
| S | CTX-M | DHA | CTX-M,E | 3       | 1 R | S |
| S | CTX-M | DHA | CTX-M,E | 3       | 1 R | S |
| S | CTX-M | CMY | CTX-M,C | 3       | 1 R | S |
| S | N     | N   |         | 0       | 1 R | R |
| S | N     | DHA |         | 2       | 1 R | R |
| S | N     | N   |         | 0       | 0 R | S |
| S | N     | N   |         | 0       | 0 R | S |
| S | CTX-M | CMY | CTX-M,C | 3       | 0 R | S |
| S | SHV   | DHA | SHV,DH/ | 3       | 0 R | S |
| S | SHV   | N   |         | 1       | 0 R | S |
| S | CTX-M | DHA | CTX-M,E | 3       | 0 R | S |
| S | CTX-M | DHA | CTX-M,E | 3       | 0 R | S |
| S | SHV   | DHA | SHV,DH/ | 3       | 0 R | S |
| S | CTX-M | DHA | CTX-M,E | 3       | 0 R | S |
| S | CTX-M | N   |         | 1       | 0 R | S |
| S | N     | DHA |         | 2       | 0 R | S |
| S | CTX-M | N   |         | 1 KPC-2 | 0 R | R |
| S | N     | N   |         | 0 IMP-8 | 0 R | S |
| S | N     | DHA |         | 2       | 0 R | R |
| S | N     | DHA |         | 2       | 0 R | S |
| S | CTX-M | N   |         | 1       | 0 R | S |
| S | N     | N   |         | 0       | 0 R | R |
| S | N     | N   |         | 0       | 0 R | S |
| S | N     | N   |         | 0       | 0 R | S |

|   |       |     |         |         |     |   |
|---|-------|-----|---------|---------|-----|---|
| S | N     | N   |         | 0       | 0 R | S |
| S | N     | N   |         | 0       | 0 R | S |
| S | CTX-M | DHA | CTX-M,E | 3       | 0 R | S |
| S | N     | DHA |         | 2       | 0 R | S |
| S | CTX-M | &N  |         | 1 KPC-2 | 0 R | R |
| S | SHV   | DHA | SHV,DH, | 3       | 0 R | S |
| S | CTX-M | CMY | CTX-M,C | 3       | 0 R | R |
| S | N     | DHA |         | 2       | 0 R | S |
| S | N     | DHA |         | 2       | 0 R | S |
| S | N     | DHA |         | 2       | 0 R | R |
| S | N     | MIR |         | 2       | 0 R | R |
| S | N     | N   |         | 0       | 0 R | S |
| S | N     | N   |         | 0       | 0 R | R |
| S | N     | N   |         | 0       | 0 R | S |
| S | N     | N   |         | 0       | 0 R | S |
| S | N     | N   |         | 0       | 0 R | S |
| S | N     | CMY |         | 2       | 0 R | S |
| S | N     | CMY |         | 2       | 0 R | S |
| S | CTX-M | DHA | CTX-M,E | 3       | 0 R | S |
| S | CTX-M | DHA | CTX-M,E | 3       | 0 R | S |
| S | N     | DHA |         | 2       | 0 R | S |
| S | N     | N   |         | 0       | 0 R | S |
| S | N     | N   |         | 0       | 0 R | S |
| S | CTX-M | N   |         | 1       | 0 R | S |
| S | CTX-M | CMY | CTX-M,C | 3       | 0 R | S |
| S | N     | N   |         | 0       | 0 R | S |
| S | N     | DHA |         | 2       | 0 R | R |
| S | CTX-M | N   |         | 1       | 0 R | S |
| S | CTX-M | DHA | CTX-M,E | 3       | 0 R | S |
| S | N     | N   |         | 0       | 0 R | R |
| S | N     | MIR |         | 2       | 0 R | S |
| S | N     | MIR |         | 2       | 0 R | S |
| S | N     | N   |         | 0       | 0 R | S |
| S | N     | N   |         | 0       | 0 R | S |
| S | N     | N   |         | 0       | 0 R | S |
| S | N     | N   |         | 0       | 0 R | S |
| S | N     | DHA |         | 2       | 1 R | S |
| S | CTX-M | DHA | CTX-M,E | 3       | 1 R | R |
| R | N     | N   |         | 0       | 1 S | R |
| R | CTX-M | DHA | CTX-M,E | 3       | 1 R | S |
| S | N     | N   |         | 0       | 1 R | S |
| S | N     | DHA |         | 2       | 1 R | R |
| S | N     | DHA |         | 2       | 1 R | S |
| S | N     | CMY |         | 2       | 1 R | S |
| S | SHV   | CMY | SHV,CM' | 3 IMP-8 | 1 R | R |
| S | N     | N   |         | 0       | 1 R | S |

|   |             |     |         |   |       |     |   |
|---|-------------|-----|---------|---|-------|-----|---|
| S | SHV         | N   |         | 1 |       | 0 R | S |
| S | N           | N   |         | 0 |       | 0 R | S |
| S | CTX-M       | CMY | CTX-M,C | 3 |       | 0 R | S |
| S | SHV         | N   |         | 1 |       | 0 R | R |
| S | SHV         | N   |         | 1 |       | 0 R | S |
| S | CTX-M       | DHA | CTX-M,E | 3 |       | 0 R | S |
| S | SHV         | N   |         | 1 |       | 0 R | S |
| S | N           | DHA |         | 2 |       | 0 R | S |
| S | N           | N   |         | 0 |       | 0 R | S |
| S | SHV         | N   |         | 1 |       | 0 R | S |
| S | CTX-M       | DHA | CTX-M,E | 3 |       | 0 R | S |
| S | SHV         | N   |         | 1 |       | 0 R | S |
| S | CTX-M & N   |     |         | 1 | KPC-2 | 0 R | R |
| S | CTX-M       | DHA | CTX-M,E | 3 |       | 0 R | S |
| R | CTX-M       | DHA | CTX-M,E | 3 | KPC-2 | 0 R | R |
| S | N           | N   |         | 0 |       | 0 R | S |
| S | N           | N   |         | 0 |       | 0 R | S |
| S | CTX-M & DHA |     | CTX-M&  | 3 |       | 0 R | S |
| S | CTX-M       | N   |         | 1 |       | 0 R | R |
| S | SHV         | N   |         | 1 |       | 0 R | S |
| S | CTX-M       | DHA | CTX-M,E | 3 |       | 0 R | S |
| S | N           | N   |         | 0 |       | 0 R | R |
| S | N           | DHA |         | 2 |       | 0 R | R |
| S | CTX-M       | CMY | CTX-M,C | 3 |       | 0 R | S |
| S | N           | DHA |         | 2 |       | 0 R | S |
| S | CTX-M       | DHA | CTX-M,E | 3 |       | 0 R | S |
| S | SHV         | CMY | SHV,CM' | 3 |       | 0 R | R |
| S | CTX-M       | DHA | CTX-M,E | 3 |       | 0 R | S |
| S | CTX-M       | DHA | CTX-M,E | 3 |       | 0 R | S |
| S | CTX-M       | DHA | CTX-M,E | 3 |       | 0 R | S |
| S | CTX-M       | DHA | CTX-M,E | 3 |       | 0 R | R |
| S | CTX-M       | DHA | CTX-M,E | 3 |       | 0 R | R |
| S | N           | ACT |         | 2 |       | 0 R | S |
| S | N           | ACT |         | 2 |       | 0 R | S |
| S | CTX-M & N   |     |         | 1 | KPC-2 | 0 R | R |
| S | SHV         | N   |         | 1 |       | 0 R | S |
| S | N           | DHA |         | 2 |       | 0 R | R |
| S | CTX-M       | DHA | CTX-M,E | 3 |       | 0 R | S |
| S | CTX-M       | DHA | CTX-M,E | 3 |       | 0 R | S |
| S | N           | N   |         | 0 |       | 0 R | R |
| S | SHV         | ACT | SHV,ACT | 3 |       | 0 R | S |
| S | N           | N   |         | 0 |       | 0 R | S |
| S | CTX-M       | DHA | CTX-M,E | 3 |       | 0 R | S |
| R | N           | N   |         | 0 |       | 0 R | R |
| S | CTX-M       | N   |         | 1 |       | 0 R | S |
| S | CTX-M       | CMY | CTX-M,C | 3 |       | 0 R | S |

|   |       |     |         |         |     |   |
|---|-------|-----|---------|---------|-----|---|
| S | SHV   | N   |         | 1 IMP-8 | 0 S | R |
| S | N     | CMY |         | 2       | 0 R | S |
| R | N     | DHA |         | 2       | 0 R | R |
| S | CTX-M | DHA | CTX-M&  | 3       | 0 R | S |
| S | CTX-M | DHA | CTX-M,E | 3       | 0 R | S |
| S | CTX-M | DHA | CTX-M,E | 3       | 0 R | S |
| S | SHV   | N   |         | 1       | 0 R | S |
| S | CTX-M | DHA | CTX-M,E | 3       | 0 R | S |
| S | CTX-M | DHA | CTX-M,E | 3       | 0 R | S |
| S | SHV   | N   |         | 1       | 0 R | R |
| S | CTX-M | DHA | CTX-M,E | 3       | 0 R | S |
| S | N     | CMY |         | 2       | 0 R | S |
| S | CTX-M | DHA | CTX-M,E | 3       | 0 R | R |
| S | N     | N   |         | 0       | 0 R | S |
| S | N     | DHA |         | 2       | 1 R | S |
| S | CTX-M | DHA | CTX-M&  | 3       | 1 R | S |
| S | CTX-M | N   |         | 1       | 1 R | S |
| S | CTX-M | DHA | CTX-M,E | 3       | 1 R | S |
| S | SHV   | DHA | SHV,DH/ | 3       | 1 R | S |
| R | N     | N   |         | 0 IMP-8 | 1 R | S |
| S | CTX-M | DHA | CTX-M&  | 3       | 1 R | S |
| S | CTX-M | DHA | CTX-M,E | 3       | 1 R | S |
| S | N     | N   |         | 0       | 1 R | S |
| S | CTX-M | CMY | CTX-M,C | 3 IMP-8 | 1 R | R |
| S | CTX-M | DHA | CTX-M,E | 3       | 1 R | S |
| R | N     | ACT |         | 2 IMP-8 | 1 R | S |
| S | CTX-M | DHA | CTX-M,E | 3       | 1 R | S |
| S | CTX-M | DHA | CTX-M,E | 3       | 1 R | S |
| S | N     | DHA |         | 2       | 1 R | R |
| S | CTX-M | DHA | CTX-M,E | 3       | 1 R | S |
| S | N     | CMY |         | 2       | 1 R | S |
| S | SHV   | DHA | SHV,DH/ | 3       | 1 R | S |
| S | CTX-M | DHA | CTX-M&  | 3       | 1 R | S |
| S | SHV   | DHA | SHV,DH/ | 3       | 1 R | S |
| S | SHV   | N   |         | 1       | 1 R | R |
| S | CTX-M | DHA | CTX-M,E | 3       | 1 R | S |
| R | N     | DHA |         | 2       | 1 R | S |
| S | N     | N   |         | 0       | 1 R | S |
| S | N     | ACT |         | 2 IMP-8 | 1 R | R |
| S | N     | N   |         | 0       | 1 R | S |
| R | N     | N   |         | 0 IMP-8 | 1 R | S |
| S | CTX-M | DHA | CTX-M,E | 3       | 1 R | S |
| S | SHV   | DHA | SHV,DH/ | 3       | 1 R | S |
| S | CTX-M | DHA | CTX-M,E | 3       | 1 R | S |
| S | CTX-M | DHA | CTX-M,E | 3       | 1 R | S |
| S | N     | CMY |         | 2       | 1 R | R |



|   |       |         |         |         |     |   |
|---|-------|---------|---------|---------|-----|---|
| R | N     | ACT     |         | 2 IMP-8 | 1 R | S |
| S | CTX-M | DHA     | CTX-M,E | 3       | 1 R | S |
| R | N     | ACT     |         | 2 IMP-8 | 1 R | S |
| S | CTX-M | N       |         | 1       | 1 R | S |
| S | CTX-M | DHA     | CTX-M&  | 3       | 1 R | S |
| S | N     | CMY     |         | 2       | 1 R | R |
| S | CTX-M | DHA     | CTX-M,E | 3       | 1 R | S |
| S | N     | N       |         | 0       | 1 R | R |
| S | N     | N       |         | 0       | 1 R | S |
| S | N     | DHA     |         | 2       | 1 R | S |
| S | CTX-M | DHA     | CTX-M,E | 3       | 1 R | S |
| S | SHV   | DHA     | SHV,DH/ | 3       | 1 R | S |
| S | SHV   | DHA     | SHV,DH/ | 3       | 1 R | S |
| S | SHV   | DHA     | SHV,DH/ | 3       | 1 R | R |
| S | CTX-M | DHA     | CTX-M,E | 3       | 1 R | S |
| S | CTX-M | DHA     | CTX-M,E | 3       | 1 R | S |
| S | N     | N       |         | 0       | 1 R | S |
| S | N     | ACT     |         | 2 IMP-8 | 1 R | R |
| S | CTX-M | DHA     | CTX-M,E | 3       | 1 R | S |
| S | N     | DHA     |         | 2       | 1 R | S |
| R | SHV   | ACT     | SHV,ACT | 3       | 1 R | S |
| S | CTX-M | DHA     | CTX-M,E | 3       | 1 R | S |
| S | N     | DHA     |         | 2       | 1 R | R |
| S | CTX-M | DHA     | CTX-M,E | 3       | 1 R | S |
| S | CTX-M | N       |         | 1       | 1 R | S |
| S | CTX-M | CMY     | CTX-M,C | 3       | 1 R | R |
| S | N     | MIR     |         | 2       | 0 R | S |
| S | SHV   | ACT     | SHV,ACT | 3 IMP-8 | 0 R | R |
| S | CTX-M | N       |         | 1       | 0 R | S |
| S | CTX-M | N       |         | 1       | 0 R | S |
| S | CTX-M | DHA     | CTX-M,E | 3       | 0 R | S |
| S | CTX-M | DHA     | CTX-M,E | 3       | 0 R | S |
| R | CTX-M | N       |         | 1       | 0 R | S |
| R | N     | N       |         | 0       | 0 R | S |
| S | SHV   | DHA     | SHV,DH/ | 3       | 0 R | R |
| S | CTX-M | DHA     | CTX-M,E | 3       | 0 R | S |
| S | CTX-M | DHA     | CTX-M,E | 3       | 0 R | S |
| S | CTX-M | DHA     | CTX-M,E | 3       | 0 R | S |
| R | N     | DHA, CM |         | 2       | 0 R | R |
| S | CTX-M | DHA     | CTX-M,E | 3       | 0 R | S |
| S | N     | N       |         | 0       | 0 R | S |
| S | CTX-M | DHA     | CTX-M,E | 3       | 0 R | S |
| S | CTX-M | DHA     | CTX-M,E | 3       | 0 R | S |
| R | N     | N       |         | 0       | 0 R | S |
| S | N     | N       |         | 0       | 0 R | S |
| S | N     | N       |         | 0       | 0 R | S |

|   |         |         |         |   |     |   |
|---|---------|---------|---------|---|-----|---|
| S | N       | N       |         | 0 | 0 R | S |
| S | N       | N       |         | 0 | 0 R | S |
| S | CTX-M   | CMY     | CTX-M,C | 3 | 0 R | S |
| S | CTX-M   | CMY     | CTX-M,C | 3 | 0 R | S |
| S | CTX-M   | DHA     | CTX-M,E | 3 | 0 R | R |
| S | SHV     | DHA     | SHV,DH, | 3 | 0 R | R |
| R | N       | DHA     |         | 2 | 0 R | S |
| S | N       | DHA     |         | 2 | 0 R | S |
| S | CTX-M   | DHA     | CTX-M,E | 3 | 0 R | R |
| S | N       | DHA     |         | 2 | 0 R | S |
| R | N       | DHA, CM |         | 2 | 0 R | S |
| R | N       | CMY     |         | 2 | 0 R | S |
| R | N       | N       |         | 0 | 0 R | S |
| S | N       | N       |         | 0 | 0 R | S |
| S | N       | MIR     |         | 2 | 0 R | S |
| S | N       | N       |         | 0 | 0 R | S |
| S | CTX-M   | CMY     | CTX-M,C | 3 | 0 R | S |
| S | N       | CMY     |         | 2 | 0 R | S |
| S | CTX-M & | DHA     | CTX-M&  | 3 | 0 R | S |
| S | CTX-M   | N       |         | 1 | 0 R | S |
| S | N       | CMY     |         | 2 | 0 R | S |
| S | N       | DHA, CM |         | 2 | 0 R | S |
| S | N       | DHA     |         | 2 | 0 R | S |
| S | CTX-M   | DHA     | CTX-M,E | 3 | 0 R | S |
| S | N       | DHA     |         | 2 | 0 R | S |
| S | N       | N       |         | 0 | 0 R | S |
| S | N       | N       |         | 0 | 0 R | S |
| S | CTX-M   | DHA     | CTX-M,E | 3 | 0 R | S |
| R | N       | N       |         | 0 | 0 R | S |
| S | N       | CMY     |         | 2 | 0 R | S |
| S | CTX-M   | N       |         | 1 | 0 R | S |
| S | CTX-M   | DHA     | CTX-M,E | 3 | 0 R | S |
| S | CTX-M   | DHA     | CTX-M,E | 3 | 0 R | S |
| S | CTX-M   | N       |         | 1 | 0 R | S |
| S | CTX-M & | DHA     | CTX-M&  | 3 | 0 R | R |
| S | N       | DHA     |         | 2 | 0 R | S |
| S | CTX-M   | DHA     | CTX-M,E | 3 | 0 R | S |
| S | N       | DHA, CM |         | 2 | 0 R | S |
| S | CTX-M   | DHA     | CTX-M,E | 3 | 0 R | S |
| S | N       | DHA, CM |         | 2 | 0 R | S |
| S | CTX-M   | DHA     | CTX-M,E | 3 | 0 R | S |
| S | N       | DHA     |         | 2 | 0 R | S |
| S | N       | N       |         | 0 | 0 R | S |
| S | N       | N       |         | 0 | 0 R | S |
| S | N       | N       |         | 0 | 0 R | R |
| S | N       | N       |         | 0 | 0 R | S |

|   |       |     |         |         |     |   |
|---|-------|-----|---------|---------|-----|---|
| S | N     | N   |         | 0       | 0 R | R |
| S | N     | N   |         | 0       | 0 R | S |
| S | N     | N   |         | 0       | 0 R | R |
| S | N     | N   |         | 0       | 0 R | S |
| S | N     | MIR |         | 2       | 0 R | S |
| S | CTX-M | N   |         | 1       | 0 R | R |
| S | N     | CMY |         | 2       | 0 R | R |
| S | N     | CMY |         | 2       | 0 R | S |
| S | CTX-M | DHA | CTX-M&  | 3       | 0 R | R |
| S | CTX-M | DHA | CTX-M,E | 3       | 0 R | S |
| S | SHV   | N   |         | 1       | 0 R | S |
| S | CTX-M | N   |         | 1 KPC-2 | 0 R | R |
| S | N     | DHA |         | 2       | 0 R | S |
| R | CTX-M | DHA | CTX-M,E | 3       | 0 R | S |
| S | CTX-M | DHA | CTX-M,E | 3       | 0 R | S |
| S | CTX-M | DHA | CTX-M,E | 3       | 0 R | S |
| S | N     | N   |         | 0       | 0 R | S |
| S | CTX-M | DHA | CTX-M,E | 3       | 0 R | R |
| S | N     | DHA |         | 2       | 0 R | S |
| S | CTX-M | CMY | CTX-M,C | 3       | 0 R | S |
| S | N     | N   |         | 0       | 0 R | S |
| R | N     | N   |         | 0       | 0 R | R |
| S | N     | N   |         | 0       | 0 R | S |
| S | N     | MIR |         | 2       | 0 R | S |
| S | CTX-M | N   |         | 1       | 0 R | S |
| S | N     | CMY |         | 2       | 0 R | S |
| S | N     | CMY |         | 2       | 0 R | R |
| S | CTX-M | DHA | CTX-M,E | 3       | 0 R | S |
| S | CTX-M | DHA | CTX-M,E | 3       | 0 R | S |
| S | CTX-M | DHA | CTX-M,E | 3       | 0 R | S |
| S | N     | DHA |         | 2       | 0 R | S |
| S | N     | CMY |         | 2       | 0 R | R |
| S | CTX-M | DHA | CTX-M,E | 3       | 0 R | R |
| S | N     | DHA |         | 2       | 0 R | S |
| S | N     | N   |         | 0       | 0 R | R |
| S | N     | N   |         | 0       | 0 S | R |
| S | CTX-M | CMY | CTX-M&  | 3       | 0 R | S |
| S | N     | N   |         | 0       | 0 R | R |
| S | N     | N   |         | 0       | 0 R | S |
| S | N     | N   |         | 0       | 0 R | S |
| S | N     | CMY |         | 2       | 0 R | S |
| S | N     | CMY |         | 2       | 0 R | S |
| S | N     | CMY |         | 2       | 0 R | S |
| R | CTX-M | DHA | CTX-M,E | 3       | 0 R | S |
| S | CTX-M | DHA | CTX-M,E | 3       | 0 R | S |
| S | CTX-M | DHA | CTX-M,E | 3       | 0 R | S |

|   |       |      |         |   |     |   |
|---|-------|------|---------|---|-----|---|
| S | CTX-M | DHA  | CTX-M,E | 3 | 0 R | S |
| S | CTX-M | DHA  | CTX-M,E | 3 | 0 R | S |
| S | CTX-M | DHA  | CTX-M,E | 3 | 0 R | R |
| S | CTX-M | DHA  | CTX-M,E | 3 | 0 R | S |
| R | N     | DHA  |         | 2 | 0 R | S |
| R | N     | N    |         | 0 | 0 R | S |
| S | N     | N    |         | 0 | 0 R | S |
| S | N     | MIR  |         | 2 | 0 R | S |
| S | N     | N    |         | 0 | 0 R | S |
| S | N     | N    |         | 0 | 0 R | S |
| S | CTX-M | CMY  | CTX-M,C | 3 | 0 R | S |
| S | N     | CMY  |         | 2 | 0 R | R |
| S | N     | CMY  |         | 2 | 0 R | S |
| S | CTX-M | DHA  | CTX-M,E | 3 | 0 R | S |
| S | CTX-M | &DHA | CTX-M&  | 3 | 0 R | S |
| S | CTX-M | N    |         | 1 | 0 R | S |
| S | CTX-M | &DHA | CTX-M&  | 3 | 0 R | S |
| S | CTX-M | DHA  | CTX-M,E | 3 | 0 R | S |
| S | CTX-M | DHA  | CTX-M,E | 3 | 0 R | S |
| S | CTX-M | DHA  | CTX-M,E | 3 | 0 R | S |
| S | N     | DHA  |         | 2 | 0 R | S |
| S | N     | ACT  |         | 2 | 0 R | R |
| R | SHV   | N    |         | 1 | 0 R | S |
| S | N     | ACT  |         | 2 | 0 R | R |
| R | N     | N    |         | 0 | 0 R | S |
| S | CTX-M | CMY  | CTX-M,C | 3 | 0 R | S |
| S | CTX-M | DHA  | CTX-M,E | 3 | 0 R | S |
| S | CTX-M | DHA  | CTX-M,E | 3 | 0 R | S |
| S | CTX-M | DHA  | CTX-M,E | 3 | 0 R | S |
| S | N     | DHA  |         | 2 | 0 R | S |
| S | N     | DHA  |         | 2 | 0 R | S |
| S | N     | DHA  |         | 2 | 0 R | S |





|   |       |          |
|---|-------|----------|
| S | N     |          |
| S | N     |          |
| S | N     |          |
| S | N     |          |
| S | N     |          |
| S | N     |          |
| S | N     |          |
| R | N     |          |
| S | N     |          |
| S | N     |          |
| R | NDM-1 | negative |
| S | N     |          |
| S | N     |          |
| S | N     |          |
| R | N     |          |
| S | N     |          |
| S | N     |          |
| S | N     |          |
| S | N     |          |
| R | N     |          |
| S | N     |          |
| S | N     |          |
| S | N     |          |
| S | N     |          |
| S | N     |          |
| S | N     |          |
| S | N     |          |
| R | IMP-8 | A/C      |
| S | N     |          |
| R | N     |          |
| S | N     |          |
| S | N     |          |
| S | N     |          |
| S | N     |          |
| S | N     |          |
| S | N     |          |
| R | N     |          |
| S | N     |          |
| S | N     |          |
| S | N     |          |
| S | N     |          |
| R | N     |          |
| S | N     |          |
| S | N     |          |
| S | N     |          |
| R | N     |          |
| S | N     |          |











|   |       |      |          |
|---|-------|------|----------|
| S | N     |      |          |
| S | N     |      |          |
| S | N     |      |          |
| S | N     |      |          |
| S | N     |      |          |
| S | N     |      |          |
| S | N     |      |          |
| S | N     |      |          |
| S | N     |      |          |
| R | IMP-8 |      | negative |
| S | N     |      |          |
| S | N     |      |          |
| S | IMP-8 |      | F        |
| S | N     |      |          |
| S | N     |      |          |
| S | N     |      |          |
| S | N     |      |          |
| S | N     |      |          |
| S | N     |      |          |
| R | N     |      |          |
| S | N     |      |          |
| S | N     |      |          |
| R | N     |      |          |
| S | N     |      |          |
| R | VIM-1 |      | negative |
| S | N     |      |          |
| R | KPC-2 | ST11 | FIA, F   |
| S | N     |      |          |
| S | N     |      |          |
| S | N     |      |          |
| S | N     |      |          |
| S | N     |      |          |
| S | N     |      |          |
| S | N     |      |          |
| S | N     |      |          |
| S | N     |      |          |
| S | N     |      |          |
| S | N     |      |          |
| S | N     |      |          |
| R | KPC-2 | ST11 | F        |
| R | KPC-2 | ST11 | F        |
| R | KPC-2 | ST11 | F        |





|   |       |      |          |
|---|-------|------|----------|
| S | N     |      |          |
| S | N     |      |          |
| S | N     |      |          |
| S | N     |      |          |
| S | N     |      |          |
| S | N     |      |          |
| S | N     |      |          |
| S | N     |      |          |
| S | N     |      |          |
| S | N     |      |          |
| S | N     |      |          |
| S | N     |      |          |
| R | KPC-2 | ST11 | N, F     |
| S | N     |      |          |
| S | N     |      |          |
| S | N     |      |          |
| S | N     |      |          |
| S | N     |      |          |
| S | N     |      |          |
| R | N     |      |          |
| S | N     |      |          |
| S | N     |      |          |
| S | N     |      |          |
| S | N     |      |          |
| S | N     |      |          |
| S | N     |      |          |
| S | N     |      |          |
| S | N     |      |          |
| S | N     |      |          |
| S | N     |      |          |
| S | N     |      |          |
| R | KPC-2 | ST11 | F        |
| S | N     |      |          |
| S | N     |      |          |
| S | N     |      |          |
| S | N     |      |          |
| R | N     |      |          |
| S | N     |      |          |
| S | N     |      |          |
| S | N     |      |          |
| S | N     |      |          |
| S | N     |      |          |
| S | N     |      |          |
| S | N     |      |          |
| S | N     |      |          |
| S | IMP-8 |      | negative |
| R | N     |      |          |
| S | N     |      |          |























|   |       |          |
|---|-------|----------|
| S | IMP-8 | negative |
| S | N     |          |
| R | N     |          |
| S | N     |          |
| S | N     |          |
| S | N     |          |
| S | N     |          |
| S | N     |          |
| S | N     |          |
| S | N     |          |
| S | N     |          |
| S | N     |          |
| S | N     |          |
| S | N     |          |
| S | N     |          |
| S | N     |          |
| S | N     |          |
| S | N     |          |
| S | N     |          |
| S | N     |          |
| S | N     |          |
| S | IMP-8 | negative |
| S | N     |          |
| S | N     |          |
| S | N     |          |
| S | IMP-8 | negative |
| S | N     |          |
| S | IMP-8 | negative |
| S | N     |          |
| S | N     |          |
| S | N     |          |
| S | N     |          |
| S | N     |          |
| S | N     |          |
| S | N     |          |
| S | N     |          |
| R | N     |          |
| S | N     |          |
| S | N     |          |
| S | N     |          |
| S | IMP-8 | negative |
| S | N     |          |
| S | IMP-8 | negative |
| S | N     |          |
| S | N     |          |
| S | N     |          |
| S | N     |          |
| R | N     |          |
